# Supplementary material for: ATF4 and ATF6 produce diverse transcriptional signatures affecting metabolic genes and cell death under glucose deprivation
Source: Research Square preprint supplement (doi:10.21203/rs.3.rs-7829324/v1), 2025-11-03
Supplement: Supplementary file 1 [file 194150afaf4d31fc7c67b0de.xlsx]

## Sheet: 16h
Gene_ID	log2FoldChange_0_glc	fdr_padj_0_glc	log2FoldChange_atf4_0_glc	fdr_padj_atf4_0_glc	log2FoldChange_atf6_0_glc	fdr_padj_atf6_0_glc
A1BG	0.215033	0.422466	0.401674	0.507278	-0.158503	0.586127
A1CF	-1.15191	0.0433749	-1.01114	0.360312	-0.602715	0.503467
A4GALT	-0.380679	0.00786957	-0.428308	0.289283	-1.06196	8.74125e-08
A4GNT	0.517806	0.573855	-0.892335	0.620643	-1.31682	1
AAAS	-0.188824	0.0193917	0.513013	0.111284	0.2379	0.00293934
AACS	0.440448	3.05046e-10	0.138725	0.630999	0.454583	4.7776e-08
AADAC	1.51698	9.4225e-07	-0.0775401	0.868006	-0.198473	0.201361
AADAT	-0.159674	0.366817	-0.0269656	0.955437	-0.04158	0.870996
AAGAB	0.084897	0.393511	0.0359745	0.917084	-0.0320484	0.78025
AAK1	1.34079	4.36276e-65	-1.09637	0.0058271	0.0829615	0.480456
AAMDC	-0.171648	0.535445	0.51962	0.43533	-0.375028	0.216887
AAMP	-0.0781583	0.364963	0.337803	0.313668	0.236182	0.00093633
AANAT	-0.278766	0.824235	1.58664	0.258603	-0.617067	1
AAR2	-0.363274	1.64232e-06	0.274331	0.414577	0.21671	0.0179191
AARD	0.140875	0.910583	-1.82852	1	-1.14357	1
AARS1	1.86984	1.09771e-85	0.287368	0.312856	0.289085	7.08113e-05
AARS2	-0.492635	1.7302e-05	0.254686	0.46316	0.289122	0.0330666
AARSD1	0.359983	0.00429467	0.791275	0.0487741	0.447011	1.7464e-06
AASDH	0.0565257	0.761231	-0.178593	0.665345	0.0736996	0.735864
AASDHPPT	0.0129296	0.924257	-0.144185	0.715276	0.168717	0.118295
TMEM26	1.86178	0.0149004	-2.66855	0.0340053	-2.98256	0.00192102
AATF	-0.24591	0.000137951	0.351731	0.289283	0.193934	0.0366073
AATK	0.273587	0.332164	-0.310398	0.550668	-0.493541	0.0917821
ABAT	-0.440825	0.269805	-1.47284	0.0530546	-1.44478	0.00145967
ABCA1	1.68384	2.91739e-47	-0.730579	0.266814	0.246087	0.0433242
ABCA10	1.78946	7.5666e-09	-1.44614	0.00365576	-0.168463	0.627412
ABCA12	0.281842	0.27441	-0.816703	0.183115	-1.77533	7.28512e-09
ABCA13	0.0343906	0.982932	-1.64119	1	-2.20612	1
ABCA2	-0.40488	6.89312e-07	-0.185388	0.627038	-0.597512	1.69457e-07
ABCA3	-0.421243	9.52429e-06	-0.0427615	0.904932	0.0808281	0.498934
ABCA4	-0.335133	0.697403	-0.539892	0.705445	-0.527455	0.64784
FILIP1L	2.65242	0.0014678	-1.14818	0.261133	-2.83373	0.00478737
ABCA6	2.01917	1	-1.82024	1	-2.82137	1
ABCA7	-0.0669803	0.586261	-0.0930055	0.804589	0.171925	0.175107
ABCA8	-0.617172	0.599186	-0.345313	0.890723	-1.57459	1
ABCA9	2.92648	1	-2.73148	1	-1.54533	1
ABCB1	1.12084	0.282924	-1.40149	0.356262	-0.565787	1
ABCB10	-0.574926	1.9872e-07	-0.237283	0.615497	-0.161168	0.140887
ABCB11	-0.360459	1	-0.662799	1	-1.44092	1
ABCB4	0.0630713	0.977124	-2.53359	1	0.651613	1
ABCB5		1		1	1.00649	1
ABCB6	1.06336	5.02186e-38	0.0834264	0.827255	0.0153855	0.911397
ABCB7	0.0799911	0.454077	-0.0584311	0.867196	-0.101669	0.436331
ABCB8	0.211172	0.00275841	0.442255	0.211533	0.112105	0.18053
ABCB9	-0.788392	2.31881e-08	-0.107465	0.800006	-0.0426347	0.867627
ABCC1	0.0686035	0.44272	-0.681424	0.102419	-0.264397	0.00395448
ABCC10	0.842954	2.51683e-14	0.181125	0.565372	0.257796	0.0366769
ABCC11	0.900553	0.191384	-0.383249	0.714736	-0.212508	0.799282
ABCC12	-2.34849	0.078059	-2.51708	1	0.83761	1
ATF6	1.01457	1.18361e-51	-0.440418	0.147665	-2.6218	9.79291e-28
ABCC3	0.754971	3.56898e-25	-0.0258534	0.949113	0.103329	0.162544
ABCC4	-0.574157	2.66641e-07	-0.00725306	0.990675	0.00509405	0.968864
ABCC5	-0.409896	0.000106431	-0.597397	0.123296	-0.50198	1.46854e-05
ABCC6	-0.630243	0.0379065	-0.196402	0.803421	-1.17249	0.0051116
ABCC8	0.303408	0.22389	0.131331	0.775217	-0.0888123	0.787909
ABCC9	1.88976	0.0155107	-1.01692	0.407004	-0.831735	0.30503
ABCD1	-0.726937	2.10899e-05	0.00554211	0.993377	0.165908	0.488996
ABCD2	-3.02469	1		1		1
ABCD3	-0.632134	3.30358e-13	-0.236535	0.495872	-0.317062	0.000842487
ABCD4	0.478821	7.10499e-05	0.178179	0.619081	0.145063	0.179361
ABCE1	-0.316761	0.00107721	0.189972	0.645733	0.0984302	0.333978
ABCF1	-0.2304	0.000618299	0.244142	0.357974	0.264463	0.000891782
ABCF2	-0.420929	1.80789e-07	0.56961	0.085108	0.367998	1.89793e-06
ABCF3	0.0437881	0.684288	0.325769	0.284024	0.35823	0.000215643
ABCG1	1.24731	5.16687e-16	-1.13368	0.0117884	-0.120469	0.536155
ABCG2	-0.298577	0.00245422	-0.374864	0.22342	-0.486669	3.61353e-07
ABCG4	-0.439435	0.460802	-0.574214	0.608443	-0.810037	0.324434
ABCG5	-1.28146	1	1.15521	1		1
ABCG8	1.00126	1	-2.46108	1	-1.60314	1
ABHD1	-0.650441	0.161745	0.638075	0.418469	-0.550112	0.420971
ABHD10	0.17651	0.0739999	-0.0194613	0.962394	0.223644	0.0391011
ABHD11	-0.00905359	0.957162	0.295073	0.563182	-0.253806	0.0693149
ABHD12	-0.220509	0.000672354	0.279861	0.453969	-0.270088	0.000239919
ABHD12B	-0.764224	0.589379	-0.304836	1	-0.69967	1
ABHD13	0.0319486	0.814187	-0.127554	0.753039	0.0042863	0.980303
ABHD14A	-0.377078	0.0215257	0.426982	0.426828	-0.208681	0.318915
ABHD14A-ACY1	0.651256	0.114509	0.388048	0.465507	0.0974127	0.838495
ABHD14B	0.260634	0.00752644	0.701038	0.0520123	0.505948	2.583e-08
ABHD15	-0.623981	1.80647e-15	-0.239585	0.425462	-0.172821	0.142794
ABHD16A	0.517167	1.76396e-07	0.1444	0.704925	-0.0672123	0.596492
ABHD16B	0.22861	0.765811	1.72427	0.183609	-0.525423	0.3522
ABHD17A	-0.457533	8.68586e-10	0.349032	0.416006	0.21927	0.0215206
ABHD17B	-0.153291	0.261325	-0.125389	0.743394	-0.0133371	0.94371
ABHD17C	-0.333013	0.00359181	-0.278097	0.359889	0.406735	0.000299961
ABHD18	-0.0689602	0.735098	-0.472107	0.238977	-0.0504633	0.83945
ABHD2	-0.0513115	0.502305	-0.139039	0.823972	0.00206613	0.989015
TTBK1	1.11611	0.00838856	-1.58183	0.00533807	-2.71008	2.81555e-08
ABHD4	0.534223	5.57851e-12	-0.499614	0.109188	0.0621939	0.552736
ABHD5	0.156017	0.292946	-0.259428	0.468315	0.202439	0.173242
ABHD6	-0.339366	0.0392876	-0.568471	0.073556	-0.26299	0.112514
ABHD8	0.279587	0.0880319	6.0324e-05	0.99993	0.263681	0.111034
ABI1	0.307908	0.00033684	-0.184446	0.607275	-0.0341111	0.762412
ABI2	-0.060432	0.494665	-0.233007	0.438302	-0.0571991	0.551686
ABI3	0.468469	1	0.092649	1	-2.04885	1
ABI3BP	-0.0070226	0.989933	-0.0993298	0.909888	-0.611575	0.25167
ABITRAM	0.244029	0.050038	0.238975	0.441375	0.210422	0.114862
ABL1	-0.280677	4.41977e-05	0.00436534	0.993479	-0.125153	0.275042
ABL2	0.618047	5.25426e-05	-0.0884449	0.863669	0.297856	0.00159603
ABLIM1	0.256514	0.000152442	-0.517821	0.296152	-0.00645357	0.95606
ABLIM2	-0.195239	0.849014	-0.0143589	0.993479	-0.110884	1
ABLIM3	1.70098	9.04712e-52	-0.375519	0.207049	0.197026	0.154534
ABR	-0.255031	0.000951781	-0.223035	0.43664	-0.200252	0.0208105
ABRACL	-0.00717195	0.967356	-0.098699	0.828058	-0.172541	0.244303
ABRAXAS1	0.407835	0.00710988	-0.0624279	0.916317	0.107901	0.588261
ABRAXAS2	0.272981	0.0101118	0.173044	0.658757	0.116309	0.325147
ABT1	-0.157827	0.153928	0.650735	0.0204473	0.388351	0.000649106
ABTB1	0.540961	9.28205e-05	-0.135992	0.725976	0.0437947	0.773293
ABTB2	0.00478293	0.970216	-0.523319	0.16037	-0.803269	4.71001e-09
RNF103-CHMP3	1.65749	0.00163168	-0.961844	0.294162	-2.58122	4.52738e-06
AC000120.4	-0.614304	0.234689	-0.577328	0.734504	-0.787736	0.73086
AC001226.2	0.289306	0.829258	-2.38656	1	-0.805048	1
AC002310.4	4.62963	0.26265	-4.34851	0.485201	-6.06827	1
AC002316.1	-0.00586014	0.975241	-0.631191	0.153242	-0.721105	4.4576e-08
AC002985.1	0.940388	1	-0.797009	1	-1.81909	1
AC002996.1	-4.92801	0.235542	3.06387	1	-2.06129	1
AC003002.3	0.991631	0.558654	-0.0852402	0.978796	-0.28587	1
AC003005.1	1.9389	8.33802e-05	0.404344	0.590883	0.649612	0.0874318
AC003006.1	-2.1447	1	0.406746	1	1.62569	1
AC004076.1	1.30215	1	2.3514	1	-0.30387	1
AC004080.3	2.45592	1	-1.67549	1	0.435668	1
AC004151.1	-1.14458	3.93823e-12	0.390783	0.462308	0.159662	0.523003
AC004223.3	0.0217092	0.996633	-3.37305	1	-3.64039	1
AC004593.2	0.776894	1	-1.88519	1	-3.50973	1
AC004687.2	2.36137	0.00567368	-1.20393	0.165549	-0.887533	0.177157
AC004691.2	-1.69379	1	1.962	1	-0.917064	1
AC004706.3	-0.806873	0.00768364	-0.457653	0.69321	0.314502	0.444365
AC004832.3	-1.28945	1	-1.98332	1	-0.456164	1
AC004922.1	0.150343	0.764684	-0.33083	0.476897	0.383292	0.252459
AC004997.1	-0.216221	0.719768	1.19164	0.0641027	0.220544	0.769441
AC005020.2	1.72519	0.223449	1.05123	0.43533	-1.12238	1
AC005041.1	-1.18062	0.297476	0.74633	1	1.45014	1
AC005261.1	0.0486833	0.792246	-0.16932	0.72492	0.0697283	0.730241
TSPAN2	0.826745	0.0173113	0.443843	0.371272	-2.43909	8.70187e-07
AC005324.4	1.55285	0.346267	-0.117976	0.959182	-1.20221	1
AC005520.3	-0.365601	0.477851	0.105216	0.916317	0.134987	0.849551
AC005670.2	0.924224	0.269805	-0.593298	0.609376	-1.16068	0.180908
AC005702.1	-2.10627	1		1		1
AC005726.1	-0.422607	0.374383	-0.16488	0.867479	0.0748553	0.90454
AC005747.1	-0.302907	0.432285	-0.583152	0.350656	-0.842157	0.0686164
AC005832.4	-2.85503	0.000185811	0.966202	0.603782	1.09485	0.778183
AC005833.1	-0.0516184	0.781246	0.217811	0.595819	0.208192	0.272822
AC005943.1	-0.326295	0.636285	-1.41249	0.437262	0.244711	0.933457
AC006030.1	-1.95965	0.280749	-2.68392	1	-0.0346503	1
AC006059.2	2.1859	1	-0.666379	1	-3.03645	1
AC006064.6	-4.04779	0.389145	-1.94733	1	-1.76705	1
AC006254.1	0.0800022	0.925183	-0.819187	0.399021	-0.639666	0.435592
AC006486.1	0.442742	0.613683	-1.26786	0.305004	-0.635031	0.463479
AC006538.2	-0.492716	0.165232	-0.323804	0.708373	-0.266448	0.634817
AC007040.2	-1.90448	0.0980107	0.936509	1	0.179787	1
AC007192.1	-1.45447	0.636773	-1.31175	0.860116	-3.39136	1
AC007244.1	1.79457	1	-1.58762	1	-0.651336	1
AC007326.4	-0.0815972	0.937358	0.38441	0.790981	-0.334508	1
AC007731.5	-0.945717	1	0.188428	1	-0.30387	1
AC007906.2	0.249236	0.599352	-0.356249	0.643922	-0.114323	0.850382
AC007998.2	1.51025	0.457779	0.116141	1	-1.55976	1
AC008012.1	-0.200065	0.971197	0.815964	0.917921	3.06272	0.562375
AC008073.3	0.604323	0.727707	-3.25036	1	-1.29832	1
AC008397.2	0.0096163	0.995364	1.85708	0.14869	0.419906	1
AC008581.2	3.46017	1	-2.85255	1	-3.5098	1
AC008676.3	-1.3496	0.285478	0.972021	1	-0.319395	1
AC008687.1	0.760721	0.667829	1.44988	0.332982	-1.95456	1
AC008687.4	-0.363737	0.788047	-0.705245	1	0.724998	1
AC008687.8	-1.26348	0.483499	0.34744	1	-0.0389725	1
AC008750.8	-1.55333	0.0128477	0.15202	0.928497	0.249081	0.830256
AC008758.1	2.08008	1	-3.17959	1	0.178028	1
AC008758.5	-1.41052	0.363187	-2.01768	1	-1.1346	1
AC008763.2	1.072	0.645464	-0.309468	1	0.946501	1
AC008764.4	0.446108	0.149454	-0.242883	0.673088	0.362632	0.353846
AC008870.1	-0.000126396	1	-0.699009	1	0.068397	1
AC008878.1	0.125278	0.943315	-0.566222	1	-4.23657	1
AC008878.2	-3.80056	1		1	1.69572	1
AC008982.1	0.37645	0.82467	-4.77958	1	-4.90471	1
AC009070.1	-0.827991	1	0.121665	1	1.16637	1
AC009133.6	-0.949562	1.55844e-07	1.51065	8.31055e-07	0.393531	0.118657
AC009163.3	-0.506517	0.792246	1.23304	0.489831	-1.36196	1
AC009163.5	1.23702	0.324728	-0.234124	0.903887	0.390488	1
AC009412.1	0.513599	0.15728	0.450938	0.235872	0.0621356	0.784166
AC009690.1	-0.569131	0.679772	-0.0924931	0.978376	1.10326	1
AC009690.3	1.30215	1	-1.10799	1	0.466169	1
AC009779.4	-1.30403	3.06464e-08	-0.213212	0.7494	-0.446158	0.262763
AC009879.3	-0.393829	1	0.798929	1	2.63349	1
AC010132.3	0.106864	0.669195	0.784377	0.177553	0.285875	0.200932
AC010197.2	0.343165	0.871778	-0.51279	1	-0.568038	1
AC010323.1	-6.54786	0.148625	6.14871	0.333057	6.56702	0.183563
AC010326.1	-0.217327	0.530587	-0.0246183	0.975576	0.128223	0.771982
AC010326.3	1.96513	1	0.0202349	1	-0.776884	1
AC010422.3	0.721888	0.114709	2.49758	0.261257	-0.475332	0.375014
AC010422.6	1.85614	0.591952	-6.90093	0.270805	-0.713499	0.868219
AC010422.8	-0.360306	0.0606879	0.242128	0.697884	0.0497521	0.858352
AC010463.1		1		1	1.00649	1
AC010522.1	-0.432511	0.358535	0.449568	0.656962	0.988004	0.010041
AC010531.1	1.59939	0.0788605	-1.56098	0.244426	-1.86808	0.12445
AC010547.4	0.435743	0.227852	-1.31754	0.208566	-0.730301	0.105302
AC010616.1		1		1	1.76008	1
AC011005.1	-0.364056	1	-0.51025	1	-0.925706	1
AC011330.3		1	1.71338	1		1
AC011448.1	-0.636801	0.102758	0.182096	0.8249	-0.0128378	0.985188
AC011455.2		1		1		1
AC011462.1	1.52063	1	-0.520511	1	-1.56649	1
AC011479.2	-1.14447	1	1.25616	1	0.563366	1
AC011498.4	-0.953869	1	1.0722	1	0.949785	1
AC011499.1		1	2.89557	1	2.42231	1
AC011511.1	0.188042	0.746925	0.143618	0.867196	-0.494988	0.451388
AC011511.4	-4.6875	0.320698	11.4025	0.00365576	7.78559	0.106239
AC011530.1	-2.60304	1		1	1.87327	1
AC012184.2	-0.533699	0.124091	-0.184899	0.85872	0.159191	0.652014
AC012254.2	-4.13837	0.176708		1		1
AC012309.1	0.599412	1	-1.71667	1	-0.0294179	1
AC012488.2	-1.59767	1	1.47583	1	1.69487	1
AC012531.3	-1.55593	1		1	2.43711	1
AC012651.1	-0.811622	0.652333	-1.77854	1	-1.24059	1
AC013394.1	0.568383	0.480651	-0.20969	0.887836	0.0180735	0.986335
AC013470.2		1		1		1
AC013489.1	-0.0175995	0.970816	0.665101	0.317545	-0.13623	0.777353
AC013717.1	5.56287	0.00178136	0.994239	0.623686	-2.97966	1
AC015802.6	0.167074	0.857908	0.974141	0.554382	-0.142619	0.905877
AC015813.2	-0.217965	0.199957	0.140816	0.842959	0.121433	0.640416
AC017083.3	-0.289756	0.592963	0.370113	0.657268	0.569411	0.277306
AC018362.3	4.41388	0.00320317	-5.64708	0.0133741	-0.195587	0.869657
AC018512.1	0.00927762	1	-1.10799	1	3.17959	1
AC018523.2	0.997301	0.292215	-0.226638	0.89202	0.207532	0.866297
AC018630.2	0.376036	0.15025	-0.0862759	0.872511	-0.906744	0.00147629
AC018809.3	0.545957	0.567931	2.08785	0.544214	-1.64808	0.135455
AC019117.4	1.55337	1	-1.32506	1	-1.61996	1
AC019257.8	6.79617	0.125297	-0.0787672	0.989644	0.615862	0.829467
AC020909.1	-3.35346	1	3.37827	1	2.13958	1
AC020915.5	1.07307	0.00969378	-1.5184	0.048839	-0.128291	0.837822
AC020922.1	-1.44254	1	0.493742	1	-1.11046	1
AC020929.1	-0.681266	0.000300575	0.555353	0.245214	-0.0785006	0.807896
AC021066.1	0.0652559	0.802403	1.10488	0.0179913	0.187807	0.474555
AC021087.5	0.800668	0.0244581	0.585519	0.256488	0.464834	0.165056
AC021092.2	0.53927	0.00290536	-0.675633	0.0723009	0.0154179	0.957407
AC022137.3	0.422564	0.246454	0.148315	0.818759	-0.583895	0.142455
AC022335.1	0.584708	1	0.121931	1	0.116908	1
AC022384.1	-0.3094	0.348327	-1.65528	0.159141	-0.613342	0.116183
AC022400.7	-0.0321722	0.930055	-0.561676	0.270629	-0.010039	0.979241
AC022414.1	1.47185	1	-1.24685	1	1.35779	1
AC022506.1	0.969684	1	1.76839	1	0.088825	1
AC022826.2	0.580019	0.0947081	-1.09719	0.295565	-0.125745	0.795653
AC022966.1	0.441563	1.36342e-10	0.180655	0.59536	0.35995	8.77919e-08
AC023055.1	-3.64999	0.0590733	3.81701	0.0747158	3.15756	1
AC024592.3	0.529844	0.537041	1.03521	0.318865	0.431229	0.564825
AC025165.3	-0.074528	0.893326	-1.22109	0.209232	0.0581844	0.925943
AC025165.6	0.853443	0.869816	1.19774	0.547757	0.155397	1
AC025283.2	0.194554	0.889865	0.153178	0.90337	-0.233045	0.87676
AC026464.4	-0.195513	0.17755	0.182374	0.545558	0.272298	0.0193467
AC026464.6	-1.47211	1	22.1214	4.73034e-06		1
AC026740.3	-1.12147	0.444339	-3.58991	1	-2.30125	1
AC026954.2	0.0580023	0.981293	0.865199	0.569807	-0.450573	0.763859
AC027644.4	0.733953	0.0825055	0.0411566	0.975327	0.0603644	0.898108
AC027796.3	-1.25678	0.552496	-2.51486	1	-2.15546	1
AC034102.2	4.43257	0.340142	-4.26392	1	-4.59371	1
AC034228.3		1		1		1
AC036214.3	-0.962825	0.604314	1.02559	1	-1.84499	1
AC037459.1	-2.05247	0.218255	0.301889	1	0.813104	1
AC040160.1	0.853329	1.68288e-09	0.214353	0.515638	0.0486333	0.72597
AC040162.1	-0.608068	0.00169875	0.496645	0.301967	-0.167375	0.511496
AC048338.1	-4.02859	0.202047		1		1
AC048338.2	2.79005	0.0846287	-1.06735	0.570166	-0.770884	1
AC055811.2	0.0342123	0.985812	1.50627	0.525828	2.13611	1
AC055839.2	0.324008	0.154903	-0.382631	0.378963	-1.70233	6.97703e-08
AC058822.1	-0.953869	1		1	0.949785	1
AC067968.1	-0.45868	0.578079	-4.02749	0.0356531	0.94277	0.298052
AC068234.1	-1.44331	0.237629	-0.778425	1	-0.633108	1
AC068533.4	-1.81439	0.32938	-2.70819	1	-2.497	1
AC068547.1	-0.0452999	0.803827	-0.187506	0.652975	-0.087112	0.626181
AC068580.4	0.388871	0.0146819	0.125171	0.764403	-0.274161	0.0525752
AC068631.3	0.939013	0.682726	2.46069	0.384134	-1.0891	0.0121087
AC068775.1	0.745996	0.65471	-0.23616	1	-0.394247	1
AC068831.8	-1.00254	8.89341e-08	-0.390711	0.479433	-0.266876	0.199666
AC068896.3	-1.18127	0.0531306	-0.843607	0.68607	-2.08694	1
AC068946.1	0.362875	0.77966	-2.20759	0.271026	-1.21273	1
AC068946.2	0.34789	0.057087	0.0232135	0.960392	0.0488555	0.831737
AC069257.4	0.835352	1	-2.33281	1	-2.50777	1
AC069288.1	-0.672127	0.00587609	0.385435	0.425876	0.232111	0.463943
AC069368.1	-0.580492	0.650531	-4.16513	1	-0.0599686	1
AC069444.2	4.09119	1	-1.90344	1	-4.04391	1
AC069503.2	0.657355	0.61018	0.534113	0.73293	0.755434	1
AC073111.4	-0.759455	0.00214321	0.082546	0.917921	-0.140267	0.719001
AC073508.2	-0.290331	0.526362	0.180793	0.82778	0.746922	0.00603761
AC073585.2	0.375735	0.487365	-0.748003	0.641689	-0.0606006	0.927657
AC073610.2	0.502271	0.384271	-0.769112	0.353922	-0.652414	0.329099
AC073612.1	-4.32297	0.103497		1	1.00649	1
AC073896.1	0.42055	0.000589467	0.451817	0.250662	0.0850439	0.633518
AC074143.1	-0.354966	0.191296	-1.04719	0.0290051	-0.392193	0.158443
AC078927.1		1		1		1
AC079447.1	0.556472	0.647314	0.228226	0.886542	-0.176627	1
AC079594.2	-0.234077	0.770326	-0.830303	0.562538	-1.151	0.189963
AC084337.2	1.47264	0.279963	-2.92263	0.163673	-0.129242	1
AC087289.3	-0.722704	0.117337	0.786192	0.299032	0.458906	0.404417
AC087632.2	-0.522055	0.000175006	-0.113486	0.840867	-0.23677	0.21172
AC087721.2	0.208263	0.653733	-1.08818	0.218138	-0.47599	0.304276
AC090360.1	2.40439	1	0.7392	1	-1.73843	1
AC090517.4	0.657623	0.435298	0.133441	0.9297	0.82701	0.273219
AC090527.3	0.402135	0.571176	-1.55635	0.269574	-0.498567	0.542809
AC091167.2	0.986541	0.0133419	0.230998	0.712394	0.0761593	0.886244
AC091167.7	0.389372	0.500001	0.396973	0.67424	-0.166654	0.79499
AC091230.1	0.26616	0.00190115	0.327202	0.306008	0.20769	0.0215584
AC091551.1	1.17214	0.267462	0.10687	0.943424	0.15686	0.893828
AC091959.3	-0.137302	0.56877	-0.842811	0.690102	-0.467108	0.440589
AC092073.1	0.19516	1	-1.24685	1	-1.46115	1
AC092143.1	1.94258e-05	0.999977	-0.790282	0.702433	-6.70473	1
AC092279.1	-0.171797	0.339848	-0.423272	0.413566	-0.40348	0.0199706
AC092587.1	0.526984	0.519678	-0.323164	0.809274	-0.522306	0.589319
AC092647.5	0.357384	0.871566	-0.923604	0.567912	-0.445647	0.599783
AC092718.3	0.762096	0.00069004	0.00379726	0.994637	0.325852	0.162371
AC092718.8	0.977437	0.437554	-0.361704	0.840853	0.53746	0.616731
AC092835.1	0.501037	0.386255	-1.05388	0.274503	-0.44883	0.483554
AC093012.1	0.401679	0.00039236	-0.403968	0.160449	-0.153886	0.267591
AC093323.1	-0.763344	1.8329e-10	0.193158	0.606464	0.244956	0.0954202
AC093512.2	0.0814498	0.457051	0.37335	0.182912	0.069194	0.514931
AC093525.1	1.88052	1	-1.19599	1	-2.2678	1
AC093525.2	-0.682903	0.297152	-0.734227	0.578875	-2.19358	0.0990622
AC093668.1	-2.63915	1		1	2.67485	1
AC093827.5	0.66457	0.540598	0.374179	0.81681	1.26626	0.144234
AC093884.1	-0.142964	0.87212	-1.52791	0.260543	-1.01533	0.447491
AC093899.2	-2.98694	1		1	1.56324	1
AC097104.1	-0.547515	0.751423	-0.0432209	1	-1.91418	1
AC097625.2	-2.40477	1	3.60868	1	1.69487	1
AC097634.4	-0.36246	0.751678	-2.04313	1	-2.03763	1
AC097637.1	0.702471	0.741231	0.221671	1	0.122241	1
AC098484.3	0.324833	0.411112	0.952066	0.185303	0.467892	0.287478
AC098582.1	-0.681127	0.84526	-5.38818	1	-5.51801	1
AC098588.2	-0.295684	0.790871	1.045	0.423153	0.449232	1
AC098650.1	1.40387	1	-0.71858	1	0.186075	1
AC098850.3	1.81536	0.0122749	0.559529	0.542884	0.414917	0.67409
AC099489.1	-0.305383	0.777946	-0.559796	0.735121	-0.926902	1
AC099811.2	-0.444521	1	0.0343377	1	-1.08589	1
AC099850.3	2.30771	1	3.00995	0.662899	-2.2678	1
AC104109.3	0.163647	0.871327	-0.630755	0.656022	-0.0373952	0.977595
AC104389.5	1.91093	1	-1.71538	1	-0.947531	1
AC104452.1	1.78971	3.59241e-14	-1.47482	0.000361796	-0.414181	0.0891766
AC104472.3	0.730443	0.458015	-0.324893	0.875195	0.232338	0.831572
AC104532.1	1.42121	1	-1.19923	1	-1.59059	1
AC105052.1	-3.00497	0.0423859	2.30488	1	-0.266885	1
AC105052.3	0.15025	0.465085	0.164	0.6589	-0.311874	0.0261507
AC106886.6	-0.410718	3.40541e-07	0.476929	0.129332	0.282828	0.00159603
AC107871.1	-1.35398	1.71706e-13	0.144558	0.788769	-0.669507	0.0179915
AC107959.5	-2.01404	0.345982	1.53071	1	2.09946	1
AC108488.2	0.315836	0.182798	0.366311	0.448582	0.575056	0.00627001
AC112128.1	-0.851049	0.0107309	-0.76088	0.501554	0.0854029	0.84981
AC113348.2	-0.875831	1	1.0722	1		1
AC114490.2	-0.511327	0.0577447	-0.49025	0.722526	0.266342	0.430595
AC114490.3	0.910201	0.308173	0.259631	0.828241	-0.484789	0.500848
AC116366.3	1.81503	0.595376	3.17131	0.159448	0.33307	0.65991
AC117378.1	-0.323471	1	-2.10289	1	-0.571016	1
AC118281.1	0.143225	0.670153	0.869046	0.183721	0.661061	0.00283349
AC118549.1	0.610505	3.08892e-09	0.0472056	0.920706	0.0769821	0.513213
AC118553.2	-0.407878	0.279963	-0.376198	0.704217	0.0618824	0.926192
AC119674.2	0.733809	0.655112	-2.23909	1	-1.28032	1
AC120057.2	-1.70717	0.744129	2.29156	1		1
AC120114.4	-0.648631	0.341124	1.11634	0.578609	-0.341417	0.800934
AC124312.1	-0.953869	1	1.0722	1		1
AC126283.2	-2.0363	0.518931	2.46354	1	1.56324	1
AC129492.3	1.01768	2.65332e-05	-0.518888	0.306255	0.0587275	0.868163
AC131160.1	0.0765234	1	-2.51486	1	0.948421	1
AC134669.1	0.895142	1	0.90955	1	-0.823051	1
AC135050.2	-0.726978	0.0940774	0.720172	0.481567	1.4326	0.000109356
AC135068.1	-0.138908	1	-1.68233	1	-0.228064	1
AC135178.3	0.303329	0.719493	-0.971038	0.412194	-0.428462	0.618828
AC137834.1	-1.01532	0.847217	-3.25879	1	0.232591	1
AC138696.1	0.939391	0.645125	-0.585332	0.466764	-0.255065	0.698694
AC138811.2	-0.45507	0.567931	-1.42082	0.298577	-0.923518	0.343105
AC138894.1	1.00134	0.045121	-0.146839	0.869892	-0.410278	0.480338
AC138969.1	0.175751	0.171787	-0.592027	0.136936	-0.303726	0.000153273
AC139491.7	-0.41701	0.634231	-0.357233	0.8249	-0.388519	1
AC140504.1	0.463257	0.285266	-0.782948	0.398366	-0.147747	0.774891
AC231657.3	-0.329754	0.78718	-0.472629	1	-0.341351	1
AC233723.1	-0.296992	0.782712	0.658841	0.665345	0.233897	1
AC233992.2	0.727731	0.310845	0.289369	0.811822	-0.00469667	0.996994
AC242842.3	7.97772	0.0671392	2.36652	0.0100394	0.405776	0.941726
IL2RB	4.60724	3.0547e-05	-1.2179	0.244679	-2.18408	0.00709632
AC245033.1	-0.175542	0.794971	-0.301078	0.79046	0.75869	0.189089
ACAA1	0.0355523	0.712657	0.25705	0.518001	-0.071488	0.498469
ACAA2	-0.00110546	0.993647	0.348619	0.312038	0.0348441	0.755807
ACACA	-0.567947	2.756e-06	-0.338068	0.48427	-0.369246	0.00114645
ACACB	-0.0238328	0.856105	-0.733279	0.0616112	-0.309668	0.0110292
ACAD10	0.0763013	0.550233	-0.0624451	0.873306	-0.135278	0.292814
ACAD11	1.28877	2.85187e-24	0.160191	0.641393	0.132318	0.344399
ACAD8	0.134892	0.402631	-0.133021	0.705445	-0.0378236	0.834234
ACAD9	-0.0828197	0.442596	0.294912	0.293506	-0.031573	0.810068
ACADL	-0.316904	0.839758	1.02704	0.578173	0.0395357	1
ACADM	-0.0628732	0.595092	0.0422942	0.918874	0.254355	0.026384
ACADS	0.332366	0.00438455	0.297356	0.557704	-0.0930862	0.491491
ACADSB	-0.245753	0.0139449	-0.499603	0.19906	-0.536948	8.66562e-06
ACADVL	0.202866	0.00537308	0.21181	0.556516	0.182258	0.0269929
ACAN	1.59992	0.191748	-0.151258	0.932926	-1.5726	1
ACAP1	1.3208	0.00698867	0.0347736	0.974681	0.217135	0.635213
DERL3	5.23595	1.2032e-42	0.159883	0.770487	-1.95133	1.99488e-10
ACAP3	-1.2008	8.62805e-34	0.341977	0.38044	0.0151026	0.93419
ACAT1	-0.0672598	0.489264	0.290195	0.359666	-0.420033	1.9851e-06
ACAT2	-0.827845	1.84473e-11	0.294704	0.444742	-0.515688	2.89684e-05
ACBD3	0.594356	2.3026e-15	-0.187917	0.708874	0.134004	0.0859578
ACBD4	0.406608	0.000112796	0.413618	0.269201	0.138197	0.288247
ACBD5	-0.125356	0.190551	-0.393767	0.325578	-0.164224	0.156939
ACBD6	0.274081	0.00021549	0.365338	0.283113	0.189389	0.0336176
ACBD7	-0.379357	0.248667	-0.4242	0.467739	-0.603961	0.0589651
SLC16A12	3.39987	1.93945e-11	0.263612	0.680469	-1.83151	2.11343e-05
ACD	-0.411689	4.64771e-05	0.449452	0.291964	0.333124	0.00305606
ACE	0.0754965	0.882308	-0.0052137	0.995373	-0.827061	0.134551
ACE2	-0.624679	1	1.07426	1	0.522326	1
ACER2	0.239788	0.37931	-0.48878	0.569807	-0.234349	0.549738
ACER3	-0.477321	3.45703e-09	-0.0286066	0.944356	0.0540276	0.659909
ACHE	0.243662	0.532448	0.589079	0.365449	-0.0293077	0.953623
ACIN1	0.0324104	0.735343	-0.134486	0.63994	-0.00830515	0.941495
ACKR2	-2.1513	1	1.9539	1	0.0724177	1
ACKR3	-0.00228165	0.991881	0.204024	0.589609	-1.29341	4.14184e-11
ACKR4	1.99104	0.120844	-1.29977	0.456124	-0.390391	1
ACLY	-0.804172	4.74685e-24	-0.041239	0.941922	-0.0990764	0.187769
ACMSD	-2.76532	1	2.48318	1	0.068397	1
ACO1	-0.300079	0.000289695	-0.156873	0.675964	0.0521122	0.637526
ACO2	-0.0871392	0.277651	0.114812	0.758801	0.279064	0.000726597
ACOT1	0.0596541	0.718563	0.140719	0.811488	-0.0073134	0.97413
ACOT11	-0.638942	0.00374525	-0.234321	0.644477	-0.442089	0.146583
ACOT12	0.661561	0.650813	1.24764	0.40436	0.681642	1
ACOT13	0.435515	0.000110397	-0.0288615	0.95576	0.0985854	0.404269
ACOT2	-0.0743368	0.401627	0.290017	0.37003	0.0530805	0.610739
ACOT4	0.433862	0.116971	0.456028	0.366465	-0.328603	0.216894
ACOT7	-0.199416	0.0477013	0.168555	0.70062	-0.233134	0.0109831
ACOT8	0.303078	0.0218682	0.25963	0.6094	0.0799238	0.596592
ACOT9	0.283483	0.000462171	0.294684	0.333473	0.243086	0.00898662
ACOX1	0.209174	0.0142934	-0.126666	0.690476	0.145856	0.117186
ACOX2	-1.03362	5.16181e-07	-0.216352	0.731003	0.609883	0.0299615
ACOX3	-0.235923	0.0659778	0.0519967	0.909572	-0.110638	0.532627
ACOXL	0.18842	1	-0.78993	1	-2.3091	1
ACP1	0.10701	0.248119	0.421742	0.170922	0.066241	0.487165
ACP5	0.710925	0.510302	0.42618	0.792832	0.534984	0.610732
ACP6	0.447604	1.59801e-05	0.32532	0.285489	0.140271	0.270831
ACP7	0.866936	0.335684	0.430259	0.688785	1.82594	0.000294037
ACPP	-2.83228	1	-0.699009	1	-0.823051	1
ACR	-0.327578	1	-0.150737	1	-1.60484	1
ACRBP	1.68565	0.300104	-1.71745	1	-1.02371	1
ACRV1	1.98008	1	-0.0559905	1	-1.17602	1
ACSBG1	0.302503	0.823426	-0.597123	0.716366	-0.54048	1
ACSF2	-0.500054	9.02903e-05	0.181805	0.664978	-0.888401	1.58221e-07
ACSF3	0.00481676	0.968676	0.180946	0.648031	0.112242	0.320472
ACSL1	0.0079443	0.959316	-0.30997	0.42702	-0.0222705	0.878331
ACSL3	0.0543815	0.445846	-0.508402	0.135191	-0.313056	1.16954e-05
CDH15	7.42968	1.69811e-70	0.628137	0.196023	-1.82665	9.79291e-28
ACSL5	-0.176622	0.86106	-1.21187	0.430102	-0.3303	0.792008
ACSL6	0.320923	0.736829	-0.807082	0.561125	-2.3944	1
ACSM3	-0.546343	0.000611103	-0.760815	0.0395345	-0.667032	0.00175139
ACSM5	-0.953869	1		1	1.70953	1
ACSM6	-0.925031	1	0.190495	1	0.982393	1
ACSS1	0.119787	0.19569	0.0867644	0.794103	0.210776	0.0364651
ACSS2	-0.39133	0.000542667	-0.515539	0.0678324	0.12025	0.395928
ACSS3	0.394285	0.575096	-1.17495	0.276697	-0.518458	0.50349
ACTA1	-1.40503	0.459657	1.32622	1	-0.449631	1
ACTA2	0.088989	0.713978	0.581798	0.145304	-0.58724	0.00655238
ACTB	-0.36662	6.07911e-11	0.310461	0.322482	-0.00374826	0.974135
ACTBL2	-3.63255	1	2.26617	1	1.00649	1
ACTC1	-2.76051	1	2.87491	1	1.72799	1
ACTG1	0.486235	5.83175e-14	0.20404	0.484366	-0.00569234	0.953894
ACTG2	-2.10456	0.222572	1.06207	1	0.402962	1
ACTL10	1.09587	0.351655	-0.0362458	0.984388	-0.0276616	0.984438
ACTL6A	-0.254518	0.013707	0.334484	0.253691	0.229776	0.029761
ACTL6B	0.969684	1	1.03771	1	1.00074	1
ACTL8	-1.28938	0.0129407	1.12762	0.110518	0.733825	0.174442
ACTN1	0.0271249	0.736264	-0.0715392	0.846393	0.018551	0.861167
ACTN2	4.88365	0.0133616	-2.13603	1	-0.474075	1
ACTN3	-1.7356	1	-1.10799	1	-1.22193	1
ACTN4	-0.50825	8.77725e-13	0.124378	0.668211	0.0148768	0.886244
ACTR10	0.256784	0.00804141	0.106144	0.773706	0.157759	0.126316
ACTR1A	-0.516649	1.64487e-15	0.215214	0.500372	0.105871	0.204535
ACTR1B	0.255332	0.0149838	0.491311	0.166041	0.236356	0.023516
ACTR2	-0.151963	0.0298578	-0.0430811	0.934601	0.0826713	0.262582
ACTR3	0.0451227	0.559974	-0.095879	0.754075	0.0109211	0.927261
ACTR3B	-0.586598	5.1774e-05	-0.211972	0.606656	-0.378623	0.0427736
ACTR3C	1.96009	0.179683	-0.207743	0.938517	-1.73771	1
ACTR5	-0.394476	0.00415781	0.332916	0.323959	0.130095	0.394355
ACTR6	0.103589	0.408026	0.0492526	0.893551	0.133602	0.323051
ACTR8	0.47907	8.2076e-06	0.132057	0.673647	0.133256	0.241159
ACTRT3	0.0598773	0.857825	-0.262645	0.658733	-0.138513	0.724962
SLC22A31	2.8952	1.3326e-77	0.425509	0.429785	-1.69946	6.32033e-31
ACVR1B	0.135943	0.129909	-0.478238	0.161201	-0.0919166	0.398105
ACVR1C	0.407631	1	0.763309	1	1.36457	1
ACVR2A	0.844687	1.48005e-10	-0.122897	0.732396	0.138258	0.407336
ACVR2B	0.366956	0.00291048	-0.549836	0.255451	-0.101649	0.519015
ACVRL1	-0.245294	0.729744	-1.18456	0.297599	-1.07418	0.318369
ACY1	0.756206	8.03562e-16	0.750039	0.0563061	0.410327	0.000277518
ACY3	-0.822958	0.0362862	-0.450977	0.672714	-1.23997	0.0553445
ACYP1	-1.12259	9.71746e-07	0.197572	0.801446	0.305588	0.346879
AP000646.1	1.78094	0.00667877	-0.365755	0.691194	-1.69049	0.0130731
AD000671.1	-0.449486	0.458273	-0.0371343	0.979086	0.0858766	0.931911
AD000671.2	1.95824	2.21817e-05	0.511815	0.434302	0.327539	0.433369
ADA	-0.279596	0.00856748	0.788562	0.0328761	-0.0174854	0.907203
ADA2	0.621675	0.678141	-1.7026	1	-2.16944	1
ADAL	0.432058	0.00651413	0.126382	0.74403	0.359254	0.0215736
ADAM10	-0.0698864	0.540193	-0.530719	0.229898	-0.444976	7.96239e-08
ADAM11	-1.03534	1.84307e-11	-0.185686	0.664464	-0.428486	0.0618251
ADAM12	-0.755708	7.36264e-05	0.0920125	0.866831	-0.525704	0.0553445
ADAM15	-0.320064	3.0547e-05	0.295087	0.429917	-0.128857	0.127028
ADAM17	1.44811	1.34017e-73	-0.738836	0.25126	0.0238438	0.812036
ADAM19	-0.450754	0.000332531	-0.433962	0.378694	-0.955131	4.02606e-12
ADAM20	0.804086	0.65974	-0.384264	1	-0.269592	1
ADAM21	1.16774	1	0.375596	1	-0.0935988	1
ADAM22	-0.829771	0.00852066	-0.795167	0.267793	-0.725649	0.099421
ADAM23	-0.723048	9.79936e-07	-1.03306	0.00297141	-1.23624	7.38365e-14
ADAM28	-0.034649	0.976672	-0.416323	0.802129	-1.74469	1
ADAM32	0.305959	0.627919	-1.01631	0.263782	-0.883866	0.187393
ADAM33	0.649253	1	1.32736	1	-0.25316	1
ADAM8	0.147021	0.551848	0.047984	0.937011	-0.0751862	0.81414
ADAM9	0.267788	0.000425085	-0.198173	0.720802	-0.0853648	0.287773
ADAMTS1	1.48797	0.011781	-0.951724	0.283786	-0.219167	0.692755
ADAMTS10	-0.557218	1.09703e-05	-0.223126	0.51879	-0.327728	0.00364386
ADAMTS12	-0.815614	1.38837e-07	-0.0530389	0.908892	-0.260959	0.199948
ADAMTS13	-0.275638	0.335684	-0.276175	0.623122	-0.286015	0.419128
ADAMTS14	2.85693	9.90715e-05	-1.18838	0.226647	-0.919066	0.150693
ADAMTS15	-0.125269	0.525151	-0.495119	0.227029	-1.28396	7.66857e-11
CLDN7	1.71952	2.06042e-05	-1.23011	0.0730417	-1.65594	9.82094e-06
ADAMTS17	0.91948	0.317331	0.566989	0.610271	-0.31129	0.779953
ADAMTS18	-1.64596	0.457779	0.453307	1	1.77464	1
ADAMTS2	0.0833355	1	1.99405	1	0.359359	1
ADAMTS3	-0.993383	1	-2.20053	1	-0.767312	1
ADAMTS4	-0.0756928	1	0.937022	1	-0.925447	1
ADAMTS6	0.577169	0.371411	-0.450838	0.653698	-0.680347	0.306277
ADAMTS7	0.0667067	0.599186	0.0101935	0.982137	-0.71449	1.30504e-06
ADAMTS8	-1.42089	0.0048119	0.987172	0.24314	-0.616719	0.497164
ADAMTS9	-1.71478	2.36497e-05	0.0380078	0.978253	-0.034419	0.970174
ADAMTSL1	-2.33276	1	0.0825931	1	-0.917064	1
ADAMTSL3	0.33365	0.709621	0.134937	0.917921	-0.326845	0.756984
ADAMTSL4	0.0126168	0.964334	0.522308	0.181036	0.440021	0.0486056
ADAMTSL5	0.00997094	0.977322	0.431053	0.420549	0.291259	0.29694
ADAP1	-0.379977	0.0454469	0.0330348	0.955771	-0.251337	0.319992
ADAP2	0.391254	0.0159902	0.295712	0.360984	-0.0666008	0.768397
ADAR	-0.102344	0.138538	-0.46641	0.345843	0.023751	0.841931
ADARB1	0.201104	0.297162	0.0596535	0.900686	-0.297087	0.157991
ADAT1	0.089831	0.401432	-0.243482	0.694592	0.223413	0.075617
ADAT2	-0.381327	0.0299457	0.372183	0.279874	-0.157808	0.494185
ADAT3	-1.02917	6.1402e-07	0.944582	0.122364	0.540299	0.0311444
ADCK1	0.417434	0.00599337	0.319442	0.474466	-0.192185	0.31518
ADCK2	-0.0239483	0.855659	0.0375154	0.934236	-0.0660236	0.615564
ADCK5	0.589756	9.69015e-06	0.411711	0.428663	-0.0379088	0.817153
ADCY1	-1.38876	4.2468e-15	-0.194822	0.775888	-0.327425	0.277306
ADCY10	-0.137922	0.950128	0.818254	1	0.552062	1
ADCY3	-0.649838	1.60248e-21	-0.125825	0.730268	-0.484244	1.9602e-06
ADCY4	0.00865588	1	-0.699009	1	0.974625	1
ADCY5	0.238453	0.510103	-0.712213	0.164359	-0.588706	0.0882528
ADCY6	-0.658006	3.41504e-16	-0.592452	0.100012	-0.626198	9.44159e-08
FHIT	1.09856	0.0329875	0.244841	0.787163	-1.61918	0.00849767
ADCY8	0.00865588	1	0.225022	1	2.92635	1
ADCY9	-0.992224	7.90593e-23	-0.355936	0.356262	-0.664356	0.00278548
ADCYAP1R1	-0.981914	1	-0.678562	1	0.605903	1
ADD1	-0.272856	8.10803e-05	0.0399399	0.908481	-0.0044758	0.969267
ADD2	-0.754535	1.79777e-20	0.0181083	0.966982	-0.195833	0.0310137
ADD3	-0.420294	9.46028e-05	-0.815369	0.0453906	-0.759674	2.52664e-08
ADGRA1	2.44185	0.0805836	-0.369037	0.83252	-1.4175	1
F7	1.28605	0.00742195	-2.23228	0.00320842	-2.36369	3.93995e-05
ADGRA3	-0.935531	5.20889e-30	-0.48793	0.146927	-0.33571	0.00400245
ADGRB1	0.444814	0.0554961	-0.456791	0.271291	-0.570316	0.0325378
ADGRB2	-0.844112	3.23112e-12	-0.0402465	0.929433	-0.649641	0.000290531
ADGRB3		1	1.47583	1	1.00649	1
ADGRD1	-0.74943	0.0900484	-0.874813	0.342239	-0.757867	0.258582
ADGRD2	0.0927509	0.891996	0.430383	0.618616	0.28032	0.701496
ADGRE1	-0.359446	0.0298861	0.28431	0.575717	0.0135025	0.961214
ADGRE2	0.250456	0.50362	0.0560881	0.946593	0.554833	0.0803272
ADGRE5	-0.28556	0.00051353	0.379774	0.161201	0.419845	1.97719e-08
ADGRF1	1.63834	1	0.209286	1	-0.252186	1
ADGRF2	-1.5222	1	1.71338	1	1.00649	1
ADGRF3	-0.276073	0.632476	-0.642817	0.556627	-1.53096	0.0501432
ADGRF4	1.80256	1.35338e-52	-1.15099	6.49046e-06	-0.13295	0.291081
ADGRF5		1	2.12678	1	1.00649	1
ADGRG1	0.461056	3.99503e-05	-0.286355	0.371198	0.0470976	0.741842
PDGFB	0.814026	6.43993e-11	-0.488622	0.0867239	-1.59389	6.32033e-31
ADGRG3	-0.175347	0.910583	-1.90454	1	-0.335803	1
ADGRG5	-1.68953	0.260811	1.00272	1	-0.499572	1
ADGRG6	0.0797183	0.801771	-0.457299	0.377608	-0.33033	1.40679e-05
ADGRG7		1	1.15521	1		1
ADGRL1	-1.54929	1.95817e-39	0.033226	0.944658	-0.059964	0.801075
ADGRL2	-0.763964	2.67862e-18	-0.570739	0.242217	-0.627536	9.08265e-07
ADGRL3	-2.1488	0.126175	-1.05955	1	-2.15305	1
ADGRV1	-0.45277	0.466285	-0.465553	0.673088	-0.658875	0.445477
ADH1C	-1.53953	1	-0.768346	1	-0.917064	1
ADH5	-0.232985	0.0142555	0.274778	0.354121	0.139743	0.17811
ADH6	-5.03122	0.00245414	-0.768346	1	1.92537	1
ADHFE1	0.878891	0.0465584	-0.421383	0.607827	-0.114942	0.836986
ADI1	0.263786	0.00306158	0.678528	0.0407625	0.246171	0.0106762
ADIPOR1	0.137534	0.0892765	-0.128956	0.662511	-0.0364153	0.751317
ADIPOR2	-0.164149	0.0381268	-0.286688	0.376359	-0.00831779	0.939056
ADK	0.351542	1.33609e-05	0.0378368	0.92252	-0.11513	0.314056
ADM	0.536685	0.104692	0.508409	0.317342	-0.089075	0.304477
ADM2	4.80718	1.08361e-19	-1.57606	4.89279e-09	0.319269	0.033889
ADM5	-1.30479	3.58187e-13	0.368631	0.575557	0.540524	0.0528918
ADNP	-0.17199	0.0242318	-0.132661	0.782177	0.0627563	0.499689
ADNP2	0.0803769	0.368875	-0.149851	0.792348	0.119513	0.210844
ADO	0.0197114	0.855478	0.080856	0.834749	0.137684	0.136262
ADORA1	-1.57489	0.00160068	0.186755	0.887388	-0.889361	0.383001
ADORA2A	0.069683	0.88308	-0.130835	0.838975	-0.684135	0.0893584
ADORA2B	0.28503	0.0273199	-0.437071	0.245214	-0.165321	0.267533
ADPGK	-0.166822	0.0262435	-0.00715692	0.983444	0.121933	0.130795
ADPRH	0.142193	0.476054	-0.0509593	0.922174	-0.293093	0.157348
ADPRHL1	0.345001	0.0166335	0.436866	0.182162	0.250153	0.0470656
ADPRHL2	-0.274898	0.0147034	0.754705	0.0527861	0.46764	2.55581e-05
ADPRM	1.40422	8.34926e-23	0.45851	0.138413	0.610334	3.97851e-07
ADRA1A		1		1		1
ADRA1B	-0.675479	4.85837e-12	-0.528476	0.0836745	-1.37506	3.30608e-24
ADRA1D	-0.760369	1.05013e-05	-0.745246	0.0390162	-0.960647	5.871e-06
ADRA2A	1.53624	1	-0.957889	1	-1.11975	1
ADRA2B	-1.44954	0.428834	-1.04916	1	-0.381742	1
ADRA2C	-0.365136	0.021327	0.903601	0.0775724	0.203978	0.235971
ADRB1	0.284775	0.27066	-0.250208	0.607275	-0.93266	0.0036153
ADRB2	1.2899	0.000208033	0.620904	0.320052	0.210948	0.562171
ADRM1	0.0205924	0.850907	0.528277	0.232213	0.294327	0.000256344
ADSL	0.144804	0.111851	0.640416	0.0274748	0.162601	0.0497803
ADSS1	-0.0733856	0.733138	0.0249862	0.966242	-0.955253	5.76571e-07
ANXA6	1.48591	1.09798e-67	-0.0986372	0.769433	-1.56645	3.68613e-37
ADTRP	1.81337	0.0739999	0.51389	0.674961	0.642446	0.468674
AEBP1	0.820509	1	0.573487	1	-1.38219	1
AEBP2	-0.25635	0.0308897	-0.269862	0.52595	0.0123536	0.938879
AEN	0.0141241	0.878199	0.396068	0.116334	0.318155	4.12043e-05
AF196969.1	1.75606	1	-0.771464	1	-1.6983	1
AFAP1	0.292113	0.000478874	-0.282966	0.608828	-0.100987	0.354653
AFAP1L1	0.217567	0.147175	-0.0673558	0.856191	0.00456164	0.979023
AFAP1L2	-0.42896	2.83394e-06	0.0266404	0.950332	-0.830764	6.37153e-13
AFDN	0.167106	0.0644691	-0.435581	0.469046	-0.262981	0.012442
AFF1	0.332268	7.69681e-05	-0.86265	0.158037	-0.212069	0.0986851
AFF2	-2.06808	1	1.0722	1		1
AFF3	3.41932	1	-1.51876	1	-0.406127	1
SYS1-DBNDD2	1.35116	0.00881743	-0.0722929	0.936843	-1.54348	0.000542379
AFG1L	0.094083	0.751579	0.266628	0.57963	-0.0507863	0.888482
AFG3L2	-0.35674	6.55725e-07	0.145872	0.612559	0.193725	0.0265807
AFMID	0.0389221	0.82928	0.591796	0.135115	0.0533428	0.765755
AFP	0.0974317	0.919558	0.398641	0.735428	-0.571084	0.559539
AFTPH	0.667033	7.88321e-12	-0.20631	0.636298	0.228323	0.00848127
AGA	0.340927	0.00400552	-0.141845	0.677187	0.0144798	0.932753
AGAP1	-0.259531	0.0171904	-0.320096	0.405066	-0.264144	0.0119306
AGAP2	0.0472986	0.93665	0.361202	0.679014	0.219975	0.72298
AGAP3	-0.338833	1.71522e-05	0.429739	0.197469	0.128785	0.174125
AGAP4	-0.0549019	0.83584	0.150232	0.787067	0.0186456	0.947988
AGAP5	0.283153	0.391238	0.0920759	0.865908	0.511577	0.079248
AGAP6	0.0783079	0.787949	0.173028	0.735592	-0.0885635	0.706955
AGAP9	0.295608	0.0981873	0.195158	0.575557	-0.179084	0.2665
AGBL2	-0.0333815	0.943484	-0.376363	0.638486	-0.151078	0.772983
AGBL3	0.186822	0.658859	-0.398518	0.555576	0.184704	0.703401
AGBL4	0.0545609	1	0.0825931	1	0.651177	1
AGBL5	-0.0264404	0.837488	0.184276	0.554892	0.092338	0.358231
AGER	-0.106434	0.80352	0.498571	0.450918	0.0595103	0.911397
AGFG1	0.0384391	0.703574	0.0796089	0.808461	0.239496	0.000896284
AGFG2	-0.0151484	0.912537	-0.276873	0.361138	-0.591137	0.000182579
AGGF1	-0.121027	0.222863	-0.149676	0.705445	0.0965552	0.374479
AGK	-0.137998	0.19756	0.239709	0.456269	0.0639743	0.606332
AGL	-0.285811	0.0602753	-0.512616	0.285489	-0.415323	0.00272293
AGMAT	-0.259175	0.0373102	0.418738	0.181165	-0.198159	0.226201
AGMO	-0.378581	0.183336	-0.554595	0.327554	-1.39969	0.000185698
AGO1	-0.531369	2.90875e-09	-0.156497	0.681879	0.107498	0.407452
AGO2	0.249509	0.0128543	-0.43034	0.266814	0.261064	0.00769291
AGO3	0.262774	0.0534558	-0.0534099	0.907942	0.048342	0.776214
AGO4	0.50327	0.000648463	-0.622153	0.117101	-0.0767849	0.701462
AGPAT1	-0.152359	0.0583751	0.226122	0.523892	0.0477506	0.66174
AGPAT2	-0.395484	0.000633814	0.390258	0.451673	-0.189977	0.0614845
AGPAT3	-0.199577	0.0169812	-0.110062	0.732662	-0.178324	0.0753028
AGPAT4	0.315739	0.0805135	-0.613802	0.0748052	-0.542126	0.00883955
AGPAT5	-0.350592	0.000271579	0.0769523	0.838383	0.0593807	0.604684
AGPS	-0.0304314	0.791267	-0.287895	0.464546	-0.118023	0.171575
AGR2	2.37147	1.95521e-20	-0.344247	0.314465	0.0644547	0.576031
AGR3	0.271206	1	-1.55758	1	-0.559641	1
AGRN	0.0148967	0.878199	0.0744635	0.824884	-0.322339	5.39484e-05
AGT	-0.728151	0.486221	0.175912	0.928955	0.339753	1
AGTPBP1	0.321902	0.00032383	-0.159736	0.640206	0.0558278	0.640502
SYT11	1.02009	2.4587e-07	-1.34379	8.58011e-05	-2.27244	4.02707e-21
AGTRAP	0.00825004	0.952486	0.546269	0.249482	0.196324	0.0313022
AHCTF1	-0.1268	0.136141	-0.136812	0.830601	-0.0821363	0.351919
AHCY	0.225819	0.00130052	0.285081	0.30439	0.269973	2.54817e-05
AHCYL1	0.139581	0.0417786	-0.172474	0.66431	-0.00987354	0.932753
AHCYL2	0.09287	0.365773	-0.388135	0.453057	-0.320832	0.00429331
AHDC1	-0.896093	4.31565e-12	-0.292696	0.46533	-0.43593	0.00533135
AHI1	0.0308692	0.809978	-0.264482	0.527075	-0.00219701	0.99193
AHNAK	-0.117762	0.199646	0.255268	0.63994	0.473536	1.37974e-06
AHNAK2	-0.0416386	0.653478	-0.101265	0.886573	-0.0343268	0.828752
AC000093.1	1.51953	1.13142e-24	-0.266719	0.548005	-1.54271	3.13981e-22
AHRR	-0.184939	0.269606	-0.606918	0.137637	-0.964755	1.97488e-07
AHSA1	-0.673135	0.00823137	0.128087	0.80816	0.161752	0.152787
AHSG	-0.356193	1	-0.178045	1	0.331419	1
AICDA	0.455574	0.7146	-1.1684	0.53977	-0.737823	1
AIDA	0.144141	0.0518533	0.16262	0.624493	0.227893	0.00271372
AIF1L	-0.609212	0.00168283	-0.204971	0.684952	-0.503761	0.0687793
AIFM1	-0.0422606	0.653365	0.0523694	0.875195	-0.00288777	0.979058
AIFM2	0.580834	1.77829e-17	-0.0259158	0.95662	0.11057	0.155574
AIFM3	-0.236558	0.370753	-0.562918	0.341234	-0.140987	0.680236
AIG1	0.458417	3.9047e-05	-0.371425	0.254202	-0.14224	0.315633
AIMP1	0.206485	0.0484417	0.224509	0.466881	0.133266	0.228158
AIMP2	0.23935	0.0145048	0.657986	0.0541262	0.336217	7.85561e-05
AIP	0.348107	0.000685172	0.228497	0.63994	0.0829285	0.434231
AJM1	-0.4248	0.0046902	0.0442125	0.938912	0.200179	0.222868
AJUBA	0.561163	8.31907e-10	0.0986808	0.771998	-0.129222	0.0909009
AK1	-0.111343	0.385252	0.587605	0.172584	0.075138	0.55483
AK2	0.393396	2.24543e-06	0.25654	0.379943	0.249461	0.00895433
AK3	0.318821	0.000936553	-0.0971155	0.812924	-0.0500435	0.685716
AK4	-0.196231	0.0654202	0.100457	0.772766	-0.467101	0.000143286
AK5	-0.021168	0.933168	0.0946502	0.865806	-0.211205	0.383229
AK6	0.0695804	0.595754	0.451493	0.246236	0.243961	0.10189
AK7	-0.455877	0.0224901	-0.623879	0.166319	-1.25853	1.06056e-06
AK8	0.119919	0.813658	0.488236	0.461134	0.143486	0.815339
AK9	0.0420601	0.908002	-0.254061	0.653698	-0.255815	0.501212
AKAP1	-0.425697	1.01657e-06	0.127293	0.734504	-0.03301	0.76629
AKAP10	0.458246	4.3882e-10	-0.186271	0.663712	0.0548601	0.592796
AKAP11	0.1142	0.222422	-0.434666	0.506886	-0.370429	0.000129455
GRID1	0.868428	0.00224897	-0.312941	0.532238	-1.51765	3.46262e-05
AKAP13	0.174149	0.0510415	-0.452566	0.407004	-0.262539	0.033124
AKAP14	1.80553	1	-0.769705	1	-1.74324	1
AKAP17A	1.09445	1.87282e-31	-0.0993164	0.775056	0.0150885	0.916165
AKAP3	-1.46472	0.185994	0.314762	1	-0.552807	1
AKAP5	-1.25894	5.61642e-06	-0.874121	0.182673	-1.15124	0.00809387
AKAP6	-0.292014	0.304356	-0.429563	0.529039	-0.412007	0.256672
AKAP7	-0.158329	0.495746	-0.119696	0.797025	0.0744251	0.798454
AKAP8	-0.109089	0.25635	0.0879418	0.783137	0.0830746	0.466612
AKAP8L	0.0689601	0.560181	0.286244	0.513142	0.119514	0.340237
AKAP9	0.458108	1.03594e-07	-0.502072	0.431792	0.0200155	0.903609
AKIP1	0.579177	2.15329e-08	0.279344	0.422377	0.0376963	0.781622
AKIRIN1	-0.0459138	0.603223	0.245524	0.412615	0.348988	1.62423e-05
AKIRIN2	0.635972	2.89431e-14	-0.0396227	0.90711	-0.128126	0.185545
AKNA	2.56044	5.77839e-204	-1.36886	1.643e-07	0.236919	0.0157582
AKNAD1	1.8462	0.00171388	0.0814677	0.932971	-0.137915	0.844216
AKR1A1	0.597113	1.51112e-14	0.587366	0.130779	0.366297	1.18897e-05
AKR1B1	0.24246	0.000142029	0.143786	0.702128	0.115587	0.191056
AKR1B10	-0.507676	8.1126e-05	-0.0491939	0.900514	-0.257147	0.00347769
AKR1B15	0.17836	0.413093	-0.161055	0.765641	-0.41645	0.0462408
AKR1C1	0.41114	2.20036e-05	-0.80481	0.0164154	-0.103776	0.139092
AKR1C2	0.0685923	0.533723	-0.0184677	0.972087	-0.165075	0.0442304
AKR1C3	-0.314427	0.00025561	0.0282595	0.954247	-0.26438	0.000203174
AKR1C4	-1.27339	0.0556803	-0.18993	0.907185	-0.0515715	1
AKR1C8P	-0.745881	0.618186	-1.07968	1	-0.759865	1
AKR1D1	2.27833	1	-3.14539	1	-3.31743	1
AKR1E2	0.353306	0.0391283	-0.110804	0.802593	-0.326167	0.0549625
AKR7A2	-0.147883	0.24804	0.644763	0.147124	0.28493	0.00826009
AKR7A3	0.589515	0.730741	-0.884907	1	-0.467116	1
AKT1	-0.478629	1.74631e-10	0.0194929	0.957088	-0.0377371	0.737614
AKT1S1	-0.093313	0.269299	0.324095	0.477779	0.216655	0.00683721
AKT2	-0.33579	6.61439e-06	0.246181	0.340103	0.194888	0.00559967
DSCAML1	0.834931	0.00381743	-0.094778	0.872511	-1.5101	1.37327e-05
AKTIP	0.310089	0.00348819	0.10408	0.760774	0.00780938	0.960795
AL020996.2	0.890463	1	-3.10981	1	-1.5594	1
AL021546.1	-2.05314	1	0.121665	1	0.8195	1
AL021997.3	0.286515	1	-1.68233	1	-0.228064	1
AL022238.4	0.371591	0.390753	-0.725327	0.835678	0.191255	0.687976
AL022318.4	-1.22411	0.569884	0.472435	1	0.543182	1
AL024498.2	2.7259	1	-2.51486	1	-2.74027	1
AL031315.1	1.14437	0.43369	-0.125085	0.95662	-2.79473	1
AL031708.1	0.0519987	0.919514	-0.61442	0.57752	-0.292866	0.565645
AL031777.2	0.760229	0.288605	-0.580081	0.674107	-0.115466	0.907203
AL033529.1	-4.25767	1		1		1
AL034430.1	0.237205	0.0818765	0.695047	0.184016	0.290782	0.0230535
AL034430.2	-0.516242	0.574636	0.317616	0.836078	0.918195	0.296675
AL035460.1	-3.58207	0.0842054	3.36091	1	2.17752	1
AL035461.4	-2.7674	0.00394968	0.531226	1	0.518351	1
AL049629.2	-1.09745	0.1225	0.956546	0.391141	0.243631	0.794525
AL049650.2	0.939186	0.371659	1.74497	0.0754596	1.18592	0.0934952
AL049697.1		1		1		1
AL049779.1	-2.08161	1	1.47583	1	1.72402	1
GP1BB	1.50325	3.04044e-09	0.161738	0.845304	-1.47974	6.57084e-07
AL049839.2	1.28087	0.289652	-1.80797	0.367247	-2.83147	1
AL096711.2	-0.998492	7.21135e-18	-0.39991	0.338988	-0.341276	0.0254124
AL109827.1	-1.65061	1	1.47583	1		1
AL110118.2	0.0690242	0.961908	-4.92596	1	-2.62627	1
AL117339.5	0.8502	0.0282927	-1.49042	0.283757	-0.698643	0.0923775
AL117348.2	3.75165	1	-3.54907	1	-3.71062	1
AL121594.1	-1.37777	1.99754e-15	-0.299241	0.610209	0.338978	0.175107
AL121753.1	0.296362	1	-1.68233	1	-1.81909	1
AL121758.1	-4.95211	0.227722	3.4862	1	3.76015	1
AL121845.2	-4.92148	0.294506	4.67757	1	4.52523	1
AL121845.3	-0.195898	0.247854	0.0461928	0.955639	-0.307184	0.159444
AL121900.1	2.01201	1	0.98525	1	0.395656	1
AL132780.3	-0.0592149	0.989334	2.42823	0.471586	-1.01204	0.816569
AL133352.1	0.151327	0.802019	-0.22098	0.853326	-0.487203	0.45786
AL133353.2	0.128238	0.88308	-0.170013	0.88404	0.629909	0.333325
AL133500.1	-4.43353	0.000245935	-0.289499	1	-0.573767	1
AL135905.2	0.282997	0.048283	0.222136	0.637557	0.639902	3.21059e-08
AL136295.1	-5.52082	0.0188064	3.56097	0.101829	0.404809	1
AL136295.3	-1.49658	1	-0.581418	1	-1.55332	1
AL136295.4	0.141887	0.676625	-0.616019	0.855277	0.445529	0.19565
AL136295.5	-1.22063	3.81717e-15	-1.2866	0.00814681	0.0861452	0.764947
AL136454.1	0.555833	0.30799	0.379222	0.650986	0.275985	0.603743
AL136531.2	0.106441	0.962513	0.247436	1	-2.3864	1
AL138752.2	1.69398	0.746211	-2.15175	0.572385	0.645331	0.923582
AL139011.2	7.57387	0.00193517	-0.500081	0.892675	-0.0567141	0.920154
AL139142.2	0.895142	1	1.69558	1	0.410145	1
AL139260.3	-5.72797	0.000916137		1		1
AL139300.1	0.425315	0.000321675	0.10985	0.81681	0.0965514	0.506289
AL139353.1	0.520098	0.371659	0.626447	0.432612	-0.0181288	0.984999
AL157392.5	2.59513	1	-1.74413	1	-0.591657	1
AL157935.3	-0.247106	0.758897	-1.16138	0.177553	0.0814665	0.939502
NYAP1	0.898316	0.000112927	-0.698197	0.0799651	-1.46857	9.85059e-07
AL159163.1	-1.08064	1	3.59143	1	1.52255	1
AL160269.1	1.58571	0.308128	-3.43833	1	-2.20216	1
AL162231.1	-0.283973	0.383946	0.545709	0.483059	0.33966	0.293296
AL162231.3		1	1.69627	1		1
AL162417.1	3.46017	1	-3.22811	1	-3.5098	1
AL163636.3	1.12939	0.00943102	0.0763358	0.948557	0.0483814	0.935984
AL353579.1		1	2.76553	1	2.1092	1
AL353588.1	-1.80578	0.374973	0.659288	1	0.295733	1
AL355102.2	0.525595	0.587519	-2.1684	0.196791	-1.44727	1
AL355312.6	-2.42041	0.216125	-0.0481985	1	-1.35139	1
AL355385.2	3.46557	1	-2.04112	1	-2.18124	1
AL355987.3	-0.536867	1	2.10298	1	-0.0353532	1
AL357075.4		1		1		1
AL357673.1	0.879991	1	-0.0144991	1	-2.31326	1
AL358113.1	0.0397143	0.962518	-2.18472	0.0538898	-0.972333	0.287801
AL358472.6	0.483186	0.0324522	-0.0499581	0.933327	0.0719613	0.789983
AL359736.1	-0.561701	0.801584	-3.80073	1	-1.90205	1
AL359922.1	0.354547	0.0878696	-0.0936656	0.831151	-0.0635455	0.805158
AL360181.3	-0.16613	0.521606	-0.271489	0.634259	0.0595175	0.878629
AL365205.1	-1.51262	1.52042e-22	-0.417964	0.414859	-0.102977	0.733973
AL365214.2		1		1	0.949785	1
AL365232.1	1.59805	1	-1.39449	1	-0.560205	1
AL391650.1	-0.177044	0.824707	0.378133	0.739067	0.695441	0.353706
AL391987.2		1		1		1
AL441992.3	-0.834719	0.0954892	0.118271	0.942993	-0.637844	0.3909
AL445423.3	-1.18637	6.39897e-05	1.02505	0.0415575	0.0591008	0.924549
AL451007.3	-0.199321	1	2.54941	1	1.35109	1
AL451062.4		1		1		1
AL451136.1	-0.723289	0.699979	0.588237	1	0.675885	1
AL512506.3	1.59805	1	-1.39449	1	-0.534446	1
AL512785.2	-0.431138	0.62429	-1.01936	0.579186	-0.521772	1
AL513165.2	0.0876171	0.974841	-1.0271	0.891752	-4.3462	0.341367
AL589666.1	-0.390569	0.66267	-0.719317	0.647226	-0.460929	1
AL590132.1	1.39451	0.200537	-1.28486	0.410227	-2.87199	0.0094819
AL590560.2	0.906513	0.00300217	-0.847138	0.0727184	0.121512	0.740116
AL591806.4	0.298992	0.0543093	-0.636056	0.874569	-0.115554	0.690468
AL603832.3	-1.16063	1	1.38537	1	0.0269623	1
AL627230.1	-0.192897	1	-0.576217	1	1.34946	1
AL662884.4	2.03094	1	-0.742093	1	-2.46546	1
AL662899.4	-0.168103	0.510472	0.326502	0.656962	-0.306926	0.321365
AL669918.1	-0.188053	0.461526	-0.383665	0.72513	0.391595	0.0786518
AL691442.2	1.76835	1	-1.56303	1	-1.73431	1
AL713999.1	2.51871	1	1.42943	0.515003	-0.155333	1
AL807752.6	-2.08161	1	1.74825	1		1
AL928654.3	-1.84422	0.113405	0.469193	1	-0.55751	1
ALAD	-0.650081	8.96045e-10	-0.0773433	0.843176	-0.0746944	0.691226
ALAS1	0.0709388	0.541233	-0.102272	0.793297	0.0756679	0.429615
ALB	1.57451	1	-2.16989	1	0.0814665	1
TXK	2.66043	0.000136399	-1.01727	0.227358	-1.46135	0.0259795
ALDH16A1	0.271078	0.00321744	0.605278	0.12067	0.530174	1.12281e-13
ALDH18A1	-0.29222	0.000543532	0.296531	0.26293	0.285756	0.000182245
ALDH1A1	-0.0837148	0.808345	0.276133	0.44637	-0.470331	0.112524
ALDH1A2	-0.511504	1	-1.37087	1	-2.43424	1
ALDH1A3	-0.691637	8.961e-12	-0.582163	0.19906	-0.608049	3.75733e-08
ALDH1B1	-0.595787	2.68545e-15	0.268523	0.39935	-0.20865	0.0262375
ALDH1L1	0.932656	0.0818265	-0.193896	0.817038	-0.348933	0.567538
ALDH1L2	2.42579	1.25893e-157	-1.69089	0.00024041	-0.0262986	0.836447
C7orf57	3.08773	2.69088e-06	-1.122	0.14302	-1.44862	0.0173372
ALDH3A1	-0.596284	3.54414e-10	0.312173	0.475875	0.108202	0.366002
ALDH3A2	-0.832009	5.86433e-43	-0.0259012	0.938714	-0.113475	0.13138
ALDH3B1	0.165057	0.112748	0.380764	0.191449	0.0562156	0.596713
ALDH3B2	0.617333	1	-1.39449	1	-1.55332	1
CDH4	1.31818	3.62326e-72	-0.0995061	0.770714	-1.42955	1.68303e-09
ALDH5A1	0.01661	0.90889	-0.736457	0.0176652	-0.456341	0.000247724
PRKN	1.80438	0.0338048	-2.80367	0.0197238	-2.16577	0.0113783
ALDH7A1	-0.135559	0.239195	0.284872	0.324866	-0.180012	0.0456234
ALDH8A1	-0.188036	0.921822	0.328154	1	0.379115	1
ALDH9A1	-0.041449	0.655446	-0.310466	0.296124	0.0115565	0.92648
ALDOA	-0.096899	0.135971	0.419371	0.340057	0.085473	0.2499
ALDOB	1.05554	1	-1.38994	1	-2.0659	1
ALDOC	-0.434349	0.0986445	-0.999798	0.0402929	-0.606613	0.0418357
ALG1	0.119809	0.220817	0.37177	0.212906	-0.0774082	0.457734
ALG10	-0.449301	0.00392652	0.0418582	0.935398	0.284012	0.119096
ALG10B	-0.136383	0.425505	-0.415106	0.414361	-0.183324	0.306638
ALG11	0.227811	0.00570884	-0.689822	0.274166	-0.0303664	0.835468
CRELD2	4.19731	0	0.189699	0.647407	-1.3814	5.60286e-70
ALG13	0.333637	0.000659258	0.10588	0.745218	0.0373547	0.783607
ALG14	0.0860462	0.591271	0.164796	0.711562	-0.0550655	0.793452
ALG1L	-0.267446	0.846315	0.868578	0.595607	-0.218358	1
ALG2	0.594008	1.00495e-11	-0.0612906	0.857086	0.723456	8.41178e-15
ALG3	0.1667	0.0528308	0.505617	0.197469	0.131566	0.136151
ALG5	1.03839	7.05662e-25	0.295527	0.416874	-0.113701	0.333642
ALG6	-0.23956	0.131359	0.0437708	0.920099	0.082505	0.701462
ALG8	-0.173516	0.0464101	0.149171	0.650781	0.0170125	0.897234
ALG9	0.0864198	0.477473	0.2252	0.453969	0.213813	0.0700749
ALK	1.80024	1	-1.47388	1	0.333286	1
ALKAL1	0.308577	0.8033	0.217568	0.901059	-0.326038	1
ALKAL2	-1.66906	1		1		1
ALKBH1	-0.170844	0.188127	0.235722	0.448076	0.112532	0.460043
ALKBH2	0.177147	0.152795	0.714578	0.0963488	0.29981	0.00185159
ALKBH3	0.683464	1.3723e-11	0.595448	0.139692	0.171069	0.126438
ALKBH4	-0.530438	3.99937e-05	0.506572	0.2389	0.0818595	0.68295
ALKBH5	-0.21018	0.0171992	0.0684277	0.829983	0.160566	0.0497127
ALKBH6	-0.342112	0.00536463	0.409176	0.434341	0.102216	0.441107
ALKBH7	0.643343	9.15881e-11	0.304655	0.603276	0.105548	0.36307
ALKBH8	0.231135	0.0562707	-0.0403146	0.934452	0.0676232	0.661101
ALMS1	-0.361316	0.000401138	-0.431053	0.582404	0.0827177	0.653865
ALOX12	1.20479	1	-2.74302	1	0.562638	1
ALOX12B	1.63252	2.11785e-05	0.143474	0.820229	0.384219	0.216865
ALOX15	-2.27681	0.207328	-1.31679	1	-1.46452	1
ALOX15B	0.363731	1	0.110616	1	-1.22193	1
SEPTIN5	2.11224	4.3271e-85	-0.133716	0.794194	-1.36341	2.4297e-39
ALOX5AP	1.23892	0.00214874	0.131008	0.876773	-0.254704	0.567574
ALOXE3	0.932199	6.40483e-07	0.109906	0.826501	0.479028	0.0165704
ALPG	1.11238	0.330815	-1.0733	0.496555	-1.30977	1
ALPI	0.0545609	1	2.03369	1	-0.917064	1
TRIM31	1.60355	7.41572e-09	-1.57073	0.00024041	-1.95139	2.29437e-11
ALPK2	-0.762355	3.16316e-17	-0.228353	0.623963	-0.29574	0.0177003
ALPK3	-0.504061	0.535796	-1.22628	0.385768	-1.83764	1
ALPL	0.166881	0.793968	0.255407	0.814846	-0.887375	0.20945
ALPP	1.51088	0.0347637	0.1728	0.872751	-0.899069	0.207098
ALS2	0.27037	0.00101714	-0.35686	0.359889	-0.0076213	0.953623
MAP2	1.09292	5.91426e-11	-1.88145	4.59994e-08	-1.87294	4.52316e-18
ALX1	-0.169806	0.512563	-0.258609	0.614805	-0.290162	0.362257
ALX4	-0.382716	0.0578886	-0.766885	0.136397	-0.779955	0.00227472
ALYREF	-0.634203	7.34253e-19	0.613865	0.187758	0.0791766	0.346025
AMACR	-0.358153	0.000778345	0.0626471	0.859335	-0.0456681	0.778182
AMBP	0.0750111	0.76275	0.043528	0.949321	-0.405623	0.116499
AMBRA1	0.0674809	0.495873	-0.309569	0.299032	-0.128818	0.242129
AMDHD1	0.391734	0.0540218	0.189303	0.638888	0.117164	0.649514
AMDHD2	0.560257	8.54536e-08	0.276569	0.555803	0.0721797	0.557596
AMER1	-0.855009	4.81084e-08	-0.0493652	0.949217	0.0309478	0.917236
AMFR	0.265531	0.000901284	0.0176008	0.962457	0.107781	0.178028
AMH	-1.04564	8.35877e-27	0.442169	0.487376	0.364176	0.0205212
AMHR2	-0.546545	0.419738	1.11114	0.222253	0.575102	0.422211
AMIGO1	-0.492607	0.0378749	-0.20407	0.698508	-0.209126	0.541612
ESAM	0.311217	0.0302421	-0.35137	0.303935	-1.29196	2.70996e-15
AMIGO3	-0.721985	0.0580791	-1.87219	0.508945	-0.00740228	0.990592
AMMECR1	-0.546568	4.72489e-10	-0.404457	0.335469	0.188079	0.140476
AMMECR1L	0.676763	4.87759e-19	-0.162421	0.680562	0.126732	0.151576
AMN	-0.528115	0.324728	0.684042	0.371378	-0.703308	0.306638
AMN1	0.581006	0.00010247	0.0930488	0.822147	-0.138459	0.387827
AMOT	-0.0567356	1	-0.906685	1	-0.65483	1
AMOTL1	-0.775017	9.94402e-19	-0.64259	0.145669	0.0142428	0.922865
AMOTL2	0.22785	0.00200633	0.168476	0.698327	0.279268	0.000405309
AMPD1	3.26401	1	-1.53799	1	-0.369572	1
AMPD2	-0.374536	1.18008e-05	0.310532	0.251378	0.159601	0.109444
AMPD3	0.550532	0.000568548	-0.617158	0.137719	0.436567	0.00320343
AMPH	-1.71352	1	1.96809	1	2.21938	1
AMT	0.756025	0.138374	0.350432	0.633868	0.745118	0.0916882
AMTN	1.9819	0.276756	0.2938	0.89301	-3.12791	1
AMY2B	0.0579792	0.937303	0.114323	0.925529	-0.0476013	0.955319
AMZ1	2.91205	0.164352	-1.65224	1	-1.23057	1
AMZ2	0.297004	0.00322673	0.319032	0.305767	0.0259258	0.807221
ANAPC1	-0.66204	6.6718e-12	0.187918	0.690377	0.133212	0.137666
ANAPC10	0.320931	0.130096	0.488074	0.226928	0.182667	0.43549
ANAPC11	-0.0601556	0.542446	0.714257	0.17326	0.201516	0.00831999
ANAPC13	-0.0235567	0.840018	0.470153	0.124743	0.203365	0.0522469
ANAPC15	-0.13098	0.269539	0.595614	0.221336	0.0275162	0.859974
ANAPC16	0.341476	0.000105498	0.24094	0.51879	0.215369	0.0293755
ANAPC2	-0.518985	1.34901e-10	0.316099	0.389455	0.156895	0.092844
ANAPC4	-0.236096	0.0393116	0.021175	0.962394	-0.131064	0.358322
ANAPC5	-0.352951	6.58756e-09	0.184987	0.532648	0.204351	0.00956581
ANAPC7	-0.737995	2.12815e-16	0.0767739	0.838303	0.218453	0.0331325
ANG	0.746306	3.47984e-05	-0.130029	0.817108	-0.0237197	0.927261
ANGEL1	-0.587539	1.17065e-08	-0.269523	0.518038	0.238479	0.0314508
ANGEL2	-0.0735087	0.473955	-0.421848	0.213209	0.117085	0.286985
ANGPT1	-1.8702	9.3209e-05	-1.14707	0.402418	-0.821914	0.426713
ANGPT2	0.433278	0.730372	0.505824	0.727188	1.70908	0.0240051
ANGPT4	0.862119	1	0.063351	1	-0.0148437	1
ANGPTL1	1.4295	1	-1.92753	1	1.51381	1
ANGPTL3	1.75606	1	-2.53907	1	-1.69808	1
ANGPTL4	0.256037	0.147782	0.293183	0.615658	-0.050422	0.908278
ANGPTL5	-0.919078	1	-0.768346	1	0.75113	1
ANGPTL6	2.03933	1	-0.152648	1	0.0448343	1
ANGPTL8	2.58782	1	-2.19772	1	-2.52859	1
ANK1	-1.42071	8.66713e-23	-0.315038	0.48115	-1.32581	1.12178e-06
RBFOX3	2.14349	6.02773e-43	-1.26936	5.3908e-05	-1.79565	1.83631e-06
ANK3	-1.80228	2.09014e-12	-1.54923	0.0632516	-1.45893	0.00176677
ANKAR	0.896462	0.00835083	0.0744289	0.90849	-0.0775672	0.861372
ANKDD1A	0.0489647	0.879709	-0.411574	0.350371	-0.588683	0.043192
ANKDD1B	0.0972173	1	0.977047	1	0.366769	1
ANKEF1	-0.0481707	0.661171	-0.242589	0.5583	0.229523	0.0187724
ANKFN1	2.04028	0.0267049	-1.92928	0.184607	-0.825756	0.376013
ANKFY1	-0.297733	2.85982e-05	-0.144737	0.816335	-0.0260882	0.812733
ANKH	-0.263255	0.00711744	-0.143687	0.673088	-0.0656378	0.635967
ANKHD1	0.430596	9.48578e-08	-0.376504	0.465798	0.118296	0.309841
ANKHD1-EIF4EBP3	0.177497	0.0814744	-0.428196	0.124904	-0.075103	0.552687
ANKIB1	0.110118	0.253943	-0.38522	0.527313	-0.0857722	0.379967
ANKK1	-1.2684	1	1.2708	1	0.982393	1
ANKLE1	-0.909972	0.169046	0.513924	0.634163	-0.0433075	0.967744
ANKLE2	-0.223703	0.00594332	0.00919354	0.980388	-0.0600574	0.562135
ANKMY1	0.769167	6.49339e-10	-0.121832	0.743394	0.0598626	0.643439
ANKMY2	0.580116	1.84277e-09	-0.291203	0.387441	-0.143953	0.276267
ANKRA2	0.680713	5.06903e-07	-0.362341	0.260543	-0.0817217	0.625969
FRMPD4	1.39122	0.00862165	-1.17383	0.135929	-1.28502	0.0246156
ANKRD10	-0.219243	0.0635569	-0.103831	0.764714	0.131408	0.391249
ANKRD11	0.430638	4.72629e-11	-0.669456	0.00742538	0.176998	0.0242382
ANKRD12	0.372472	0.000499716	-0.661851	0.320804	-0.0698779	0.624485
ANKRD13A	0.65692	2.66524e-14	-0.140585	0.752448	0.147514	0.170285
ANKRD13B	-1.1349	4.73646e-19	0.483552	0.22059	-0.174535	0.32355
ANKRD13C	-0.285988	0.0163643	-0.12087	0.793666	0.0404478	0.813257
ANKRD13D	-0.0669963	0.586667	0.311093	0.495804	0.21567	0.0634174
ANKRD16	-0.141506	0.487988	0.345805	0.378676	0.112113	0.488546
ANKRD17	-0.380624	3.42386e-07	-0.253193	0.698555	0.0352268	0.794922
SDC2	2.06096	2.22565e-05	-0.384489	0.550948	-1.25103	0.0230427
ANKRD18B	0.0864826	0.678732	-0.404532	0.33641	-0.506366	0.0114383
ANKRD2	-0.645134	0.0848607	1.69764	0.000233539	-0.361798	0.407309
ANKRD20A1	-0.574025	0.261897	-0.978424	0.486342	0.0561204	0.934963
ANKRD20A2	-0.315256	0.658389	-0.618981	0.727235	-0.0357907	0.97314
ANKRD20A3	0.0616019	0.979009	1.11005	0.720938	1.25535	1
ANKRD20A4	-0.58452	0.406228	-0.0905233	0.950524	0.0882806	0.935839
ANKRD22	-0.999796	0.0641169	-1.25079	0.269955	1.08914	0.0665135
ANKRD23	-0.309776	0.22276	0.28438	0.624507	0.146533	0.665306
ANKRD24	-0.469913	0.455658	0.616953	0.485936	0.805023	0.125528
ANKRD26	-0.242476	0.128199	-0.308361	0.592621	-0.138282	0.47888
ANKRD27	0.549343	1.36936e-15	-0.189966	0.653456	0.254241	0.000864167
ANKRD28	0.42035	4.02548e-09	-0.408677	0.371198	-0.00193367	0.986317
ANKRD29	0.062742	0.681208	-0.189682	0.586013	0.145277	0.39389
ANKRD30A	0.0973438	0.821779	0.235298	0.719429	-0.68115	0.0675492
ANKRD31	0.883916	0.101033	-0.558152	0.543571	-0.576673	0.318143
ANKRD33B	0.0480491	0.718297	-0.410009	0.532659	-0.282685	0.0145732
ANKRD34A	-1.67621	0.021117	-0.224188	0.921521	0.509321	0.662255
ANKRD34B	3.57778	0.0116558	0.720928	0.529865	-1.66782	1
ANKRD35		1		1	0.949785	1
ANKRD36	0.337984	0.0254097	-0.382707	0.351994	-0.151977	0.427568
ANKRD36B	0.292595	0.180106	0.215194	0.587823	0.013876	0.966721
ANKRD36C	0.48903	0.100437	-0.163668	0.76036	-0.343428	0.282177
ANKRD37	0.337917	0.493769	0.183664	0.8261	0.38164	0.382156
ANKRD39	-0.0289674	0.860021	0.244007	0.606485	-0.0749115	0.648509
ANKRD40	-0.0246577	0.807533	0.00357982	0.994227	0.0679907	0.457695
ANKRD40CL	-0.600451	1	0.0825931	1	0.00222301	1
ANKRD42	0.488703	2.10856e-06	-0.420331	0.344505	-0.0708421	0.604342
ANKRD44	0.0769164	0.801342	-0.597196	0.259322	0.120741	0.696451
ANKRD45	-2.39341	0.00711979	-3.0014	1	-1.07693	1
ANKRD46	0.2247	0.211367	0.0779341	0.88305	0.316018	0.0561794
ANKRD49	0.562622	0.000253574	-0.381773	0.274602	-0.18446	0.332755
ANKRD50	0.0789278	0.448627	-0.357148	0.555945	0.105802	0.326144
ANKRD52	-0.761636	3.94122e-27	0.168009	0.730429	0.175725	0.0584091
ANKRD53	-0.817645	1	2.86727	1	2.75492	1
ANKRD54	-0.694548	1.50486e-12	0.328398	0.401203	0.18865	0.129563
ANKRD55	-0.410602	1	-1.8896	1	1.85198	1
ANKRD6	-0.295088	0.106232	-0.771273	0.155547	-0.549277	0.0194419
ANKRD61	-0.10494	0.867573	0.402188	0.630114	0.432464	0.474218
ANKRD62	-1.77477	1		1		1
ANKRD63	-1.57678	0.0401399	-0.0517482	0.979926	-0.167905	1
ANKRD65	2.53795	1	-0.396995	1	-2.50777	1
ANKRD7	0.583258	0.478167	0.11595	0.928192	-0.112289	0.919149
ANKRD9	-1.2985	5.12488e-26	0.191792	0.768166	-0.266167	0.0768266
ANKS1A	-0.478629	7.94198e-06	-0.271092	0.561125	-0.101839	0.526281
ANKS1B	-0.927288	0.153701	0.460229	0.734504	-0.420958	0.701462
ANKS3	0.118829	0.226947	0.524279	0.203443	0.0536931	0.697284
ANKS4B	-3.58586	3.44845e-10	0.886871	0.574682	-1.13074	1
ANKS6	-0.718159	2.54589e-19	-0.0414232	0.910227	-0.174263	0.101007
ANKUB1		1		1		1
ANKZF1	0.439671	5.68352e-05	-0.245152	0.465798	0.193174	0.105547
ANLN	-1.3929	3.03536e-75	0.0367533	0.953586	0.0171587	0.884777
ANO1	-0.764959	0.0123927	-0.362163	0.553947	-0.0503649	0.925602
ANO10	0.493522	4.30383e-09	-0.407609	0.182673	0.0898059	0.402753
ANO3	-0.272938	1	-1.99074	1	-3.03645	1
ANO4	-0.762254	0.658655	-1.72639	1	-0.26905	1
ANO5	-0.0913927	0.51309	-0.68437	0.0538898	-0.491177	0.000395138
ANO6	0.18044	0.0650641	-0.26217	0.648564	-0.333672	0.000310477
ANO7	-0.165974	0.533402	0.39317	0.441932	-0.00363012	0.994168
ANO8	0.060973	0.712281	-0.159311	0.682404	0.280614	0.0478968
ANO9	0.381098	0.173441	-0.470795	0.403363	-0.906455	0.000687013
ANOS1	-0.253211	0.887311	-0.546055	1	-0.328172	1
ANP32A	-0.463347	3.52193e-06	0.610736	0.0410498	0.0795529	0.46634
ANP32B	0.155173	0.0719191	0.297136	0.348081	0.282245	0.000878299
ANP32E	-0.469666	2.50698e-05	0.18798	0.609376	-0.0264807	0.841771
ANPEP	0.00444459	0.994599	-0.242495	0.699589	0.563317	0.290176
ANTKMT	0.345534	4.90108e-05	1.00649	0.0438095	0.361463	1.46854e-05
ANTXR1	-0.246664	0.0258058	0.63854	0.126774	0.111903	0.351346
ANTXR2	0.70821	0.000286436	-0.693009	0.0591467	0.631066	0.00072981
ANTXRL	-1.1861	0.547989	-0.116246	1	0.123732	1
ANXA1	0.586659	4.99999e-07	0.227083	0.5061	0.283381	0.00308023
ANXA10	0.366373	0.40704	-0.536678	0.387431	0.248274	0.588723
ANXA11	-0.40495	4.55884e-09	0.252017	0.486796	0.0268453	0.773735
ANXA13	-1.83836	2.19624e-11	0.741365	0.166086	-0.132839	0.753597
ANXA2	-0.162491	0.0219704	0.598462	0.0822875	0.41662	1.20791e-06
ANXA2R	-0.000660517	0.998527	-0.00986354	0.992295	0.359397	0.370955
ANXA3	0.867763	2.91887e-41	0.310716	0.305004	-0.0314519	0.78025
ANXA4	-0.282639	8.16951e-06	0.226952	0.385878	-0.209736	0.00469203
ANXA5	0.56295	2.55125e-07	0.137851	0.682385	0.424415	1.38353e-06
HDAC9	1.3007	0.000333093	-1.32545	0.0719537	-1.24072	0.00180876
ANXA7	0.303334	1.32136e-05	0.0138268	0.97012	0.184232	0.0254283
ANXA8	0.0293526	0.910583	0.956684	0.00779965	-0.30822	0.139197
ANXA8L1	-0.112222	0.461427	1.06371	0.00561532	-0.0857139	0.576034
ANXA9	-0.0346894	0.944485	-0.457567	0.47915	-0.460277	0.341703
AOAH	-0.953869	1		1	1.00649	1
AOC1	-0.818801	1	-1.80767	1	-1.97031	1
AOC2	-0.543311	0.0453597	-0.06102	0.926175	-0.199494	0.599314
AOC3	-1.00684	0.00866128	-0.212193	0.810447	0.250508	0.659909
AOPEP	-0.956814	2.23362e-12	0.442922	0.280372	-0.466246	2.77541e-06
AOX1	0.511146	0.00476805	0.405176	0.295868	0.456721	0.00512261
CRISPLD2	1.10303	2.87631e-07	-1.04197	0.00999164	-1.754	0.000140943
AP000311.1	-1.63603	0.15643	0.972032	1	0.30993	1
AP000350.4	0.173339	0.943812	-1.35469	1	-1.76554	1
SORCS2	0.973553	1.50613e-10	-0.185017	0.652418	-1.2359	1.02647e-12
AP000812.5	0.0476794	0.936274	0.201365	0.832033	-0.227464	0.7184
AP000944.5	-1.03288	0.186154	-0.641336	0.431792	0.291964	0.732506
AP001267.5	0.734122	0.612251	0.349753	0.830601	-1.19781	1
AP001273.2	1.98988	0.685649	-5.42279	1	-0.557575	1
AP001453.5	0.616131	0.00110277	0.479743	0.246236	0.200979	0.315099
AP001781.2	5.84534	0.00106088	-1.13066	0.622897	0.348567	0.779439
AP001931.1	0.556238	0.819832	-3.15795	0.111341	-6.31168	1
AP001931.2	-0.131626	0.869673	-0.483981	0.257417	-0.167546	0.577599
AP002373.1	1.49616	0.155836	-0.719206	0.645733	-0.809271	1
AP002495.1	-0.257851	0.593611	0.264101	0.732493	-0.0348834	0.960795
AP002748.5	-3.47363	0.468808	-1.55611	1	-1.96838	1
AP002884.2	-1.77477	1	1.0722	1	1.72402	1
AP002990.1	-0.270033	0.189821	0.0729917	0.870388	0.22252	0.282647
AP003071.5	0.931069	0.139596	-0.686857	0.453969	-1.2769	0.0557056
AP003108.2	-0.4521	0.00311859	-0.131856	0.72513	0.292798	0.0653661
AP003419.1	0.376938	0.00865644	0.602986	0.268357	0.265203	0.031306
AP006333.1	1.53761	4.347e-06	-1.6692	0.000700312	-0.0330182	0.943396
AP1AR	0.785508	4.05207e-21	-0.495347	0.246362	0.00982836	0.940458
AP1B1	-0.487276	2.02192e-13	0.255316	0.399423	-0.0236479	0.830276
AP1G1	-0.277906	1.78545e-05	-0.250782	0.593629	-0.0902343	0.297683
AP1G2	0.503403	4.64497e-08	0.109235	0.773596	-0.131453	0.219048
AP1M1	-0.624817	4.7923e-13	0.342996	0.355343	0.224251	0.0156617
AP1M2	-0.895137	4.76056e-06	0.422818	0.372415	-0.230608	0.277
AP1S1	-0.533784	1.77645e-14	0.260759	0.538773	0.120318	0.233862
AP1S2	0.297455	0.0140566	-0.0391084	0.913403	-0.0948444	0.467556
AP1S3	-0.419252	9.70787e-05	-0.0302051	0.940253	-0.21106	0.0699269
AP2A1	-0.29524	9.12433e-05	-0.133435	0.664464	-0.149792	0.140647
AP2A2	-0.495139	1.07836e-13	-0.0296437	0.944592	-0.108534	0.193433
AP2B1	-0.2658	1.71902e-05	-0.102503	0.790381	0.0159546	0.867595
AP2M1	-0.377278	3.50049e-08	0.485961	0.128324	0.185957	0.0113695
AP2S1	-0.363528	6.7029e-06	0.481315	0.38226	0.0995333	0.278104
AP3B1	-0.203893	0.00620737	-0.0735598	0.866169	0.188272	0.0436859
AP3B2	0.77649	0.0609114	0.358246	0.547188	-0.393524	0.412737
AP3D1	0.647077	4.07025e-14	0.166611	0.54491	0.170822	0.0232801
AP3M1	-0.219243	0.00474727	-0.134643	0.719151	0.193875	0.0238226
AP3M2	0.187223	0.0625456	-0.229419	0.413566	-0.128017	0.237172
AP3S1	0.558092	9.05281e-11	0.226014	0.519894	0.119918	0.287598
AP3S2	0.175197	0.0603805	0.149309	0.604732	0.14838	0.0829918
AP4B1	0.0250947	0.904	-0.174268	0.639936	0.281358	0.0579927
AP4E1	-0.0713283	0.473962	-0.577169	0.25126	-0.209417	0.0568973
AP4M1	-0.0236749	0.862365	0.325127	0.389698	0.235546	0.0486026
AP4S1	0.0816856	0.554026	0.106302	0.769224	0.304198	0.0180094
AP5B1	-0.521781	7.31978e-10	0.103894	0.741555	0.20194	0.0449127
AP5M1	-0.426099	9.12315e-06	-0.023685	0.963676	0.0908861	0.507758
AP5S1	0.0943892	0.343289	0.287008	0.299032	0.179027	0.0840534
AP5Z1	1.25857	7.47286e-31	-0.366126	0.342521	-0.142334	0.213052
APAF1	-0.849757	3.39681e-19	-0.657699	0.194112	-0.179405	0.181396
APBA1	-0.159537	0.729364	-0.834202	0.249988	-1.04235	0.0797958
APBA2	-0.418994	1.83813e-05	-0.113546	0.747048	-0.299358	0.0279335
APBA3	0.198249	0.145326	0.56373	0.15733	0.543057	1.27117e-05
APBB1	-0.209149	0.0554878	0.127969	0.764714	-0.299415	0.00853052
PLB1	1.58245	1.46354e-07	-0.474575	0.225391	-1.231	5.38911e-06
STAC	0.548618	0.00433853	-0.210601	0.621377	-1.2285	3.71057e-10
APBB3	0.606491	0.00202224	-0.416258	0.241428	0.146891	0.507084
APC	-0.115499	0.223416	-0.487945	0.439646	-0.0491386	0.7276
APC2	-0.637443	0.000620637	-1.16065	0.00107182	-0.756565	0.000400719
APCDD1	-2.26476	1	2.35783	1	-1.46115	1
APCDD1L	-0.875831	1		1		1
APEH	0.105897	0.25042	0.576359	0.0543955	0.407902	1.10821e-08
APEX1	0.268673	0.00366359	0.208834	0.538372	0.235113	0.00277046
APEX2	-0.736868	3.0909e-23	0.365748	0.206326	0.155279	0.120573
APH1A	-0.130221	0.105872	0.308607	0.270046	0.193282	0.010048
APH1B	0.912296	3.42478e-20	-0.0630205	0.851136	-0.176398	0.171395
API5	-0.364183	9.57579e-06	0.0207837	0.962353	0.133575	0.122705
APIP	-0.223979	0.0750226	0.354868	0.324416	0.179708	0.179023
APLF	0.554071	0.0253801	-0.22061	0.647664	0.358654	0.118627
APLN	-1.54845	4.16315e-06	1.56481	0.00197287	-0.261641	0.66174
APLNR	0.222034	1	0.378587	1	0.791638	1
APLP1	-0.107136	0.281499	-0.302708	0.348081	-0.998845	5.39885e-30
SLIT3	0.354903	0.00307346	-0.363922	0.282066	-1.22312	3.53984e-27
APMAP	-0.384375	1.35389e-10	-0.0597127	0.863364	-0.285034	8.5262e-05
APOA1	-1.56817	1	1.98931	1	1.15634	1
APOBEC2	-1.58721	1	-0.699009	1	-0.823051	1
APOBEC3A		1		1		1
APOBEC3B	-0.678736	2.68133e-08	0.0684808	0.860116	0.575804	1.48918e-06
APOBEC3C	-0.140508	0.149899	0.358746	0.208566	-0.0890425	0.415773
APOBEC3D	0.606893	0.708303	-1.22017	0.646722	-1.59939	1
APOBEC3F	-0.0906703	0.739322	-0.213507	0.658757	0.176289	0.545555
APOBEC3G	0.969684	1	0.982381	1	-0.0434698	1
APOBEC3H	0.00627995	0.996764	-1.98435	1	0.115518	1
APOBR	-1.07373	0.567428	1.33377	1	-0.130413	1
APOC1	-0.250673	0.0282873	0.723596	0.191449	0.0204814	0.908706
APOD	0.459609	0.345498	-1.18612	0.0830529	-0.928898	0.0439511
APOE	0.109978	0.676251	0.583818	0.331975	-0.334906	0.200672
APOH	-0.62833	0.00346958	-0.877676	0.0583932	-0.734749	0.0072012
APOL1	-0.535791	0.00131305	-0.0906576	0.850537	-0.444227	0.0437513
APOL2	-0.653896	4.91871e-09	0.145757	0.758239	0.173374	0.300967
APOL3	0.3043	0.860944	-0.244972	1	-3.37131	1
APOL6	0.698567	5.86963e-10	-1.38681	0.000548718	0.10419	0.454284
APOLD1	0.971122	0.00293935	-0.605035	0.285489	0.265181	0.462728
APOM	0.672285	0.132006	0.205338	0.793666	0.0255978	0.967744
APOO	-0.332776	0.016852	0.443841	0.310258	0.2241	0.211709
APOOL	0.298539	0.00306868	-0.377586	0.276415	-0.0714384	0.581916
TMEM50B	2.05138	1.22422e-117	-0.394125	0.123439	-1.20597	8.29062e-49
APPBP2	0.191129	0.0163152	-0.407278	0.265692	0.108426	0.277313
APPL1	-0.172436	0.0474564	-0.404873	0.427884	-0.166565	0.0765687
APPL2	0.0211551	0.852555	0.223541	0.484159	-0.252184	0.00519374
APRT	0.123997	0.163506	0.954151	0.0644107	0.32373	3.0081e-05
APTX	0.14237	0.0988089	0.348758	0.317558	0.287496	0.00178878
AQP1	-0.478244	0.432685	-0.247904	0.818504	-1.35085	0.112111
AQP11	0.564284	0.0415554	-0.351246	0.429212	-0.443781	0.136299
AQP3	-1.02666	0.000135524	-0.122683	0.816165	0.966254	5.01445e-07
AQP5	-2.62453	1		1		1
AQP6	-3.7586	0.025877	2.34538	1	1.59921	1
AQP7	-0.704165	0.219677	-0.72588	0.509486	-1.68713	0.0739091
AQP8	0.308042	1	-0.078465	1	-3.40336	1
AQP9	-1.47211	1	1.69627	1	1.42777	1
AQR	-0.21117	0.0253801	-0.100909	0.852235	-0.0315829	0.790296
AR	-0.0785923	0.574848	-1.2256	0.0129365	-0.913427	6.55826e-10
ARAF	0.265699	0.000298996	0.4622	0.225834	0.356382	1.13643e-06
ARAP1	0.11857	0.191767	-0.214051	0.454995	0.20658	0.0229405
ARAP2	0.566294	0.0306119	-0.710566	0.312194	-0.154484	0.603278
ARAP3	-0.205448	0.0749788	-0.100718	0.811693	-0.127156	0.363861
ARC	3.1744	0.00155702	-1.08436	0.142291	-0.403085	0.542519
ARCN1	0.334271	2.76815e-08	-0.0310641	0.948176	0.289235	1.17932e-05
AREG	1.54832	8.04415e-91	0.119512	0.717293	0.153913	0.0306291
AREL1	-0.156486	0.0605707	-0.596113	0.191121	-0.139344	0.213532
ARF1	0.396428	3.07601e-11	0.129215	0.727508	0.246892	0.000360494
ARF3	-0.597536	2.05543e-19	-0.0290331	0.93008	-0.0529212	0.601349
ARF4	1.11725	3.23878e-48	0.189537	0.51574	0.4199	8.6928e-06
ARF5	-0.155792	0.0528354	0.631464	0.193222	0.16816	0.0478781
ARF6	-0.229667	0.00115426	0.718403	0.00122234	0.293029	1.20701e-05
ARFGAP1	0.0359637	0.633513	0.3074	0.350656	0.0576646	0.55657
ARFGAP2	0.463895	2.36456e-06	0.340104	0.255982	0.255768	0.00182217
ARFGAP3	1.38743	3.67322e-65	-0.00823556	0.982137	0.502513	5.87496e-08
ARFGEF1	0.0794245	0.35446	-0.462605	0.387766	0.016031	0.887506
LHPP	0.651388	1.00524e-06	0.460216	0.218783	-1.20412	7.42487e-11
ARFGEF3	1.23729	1.2571e-40	-0.538022	0.314766	-0.118614	0.440589
ARFIP1	-0.0889015	0.523612	0.245949	0.513941	0.306842	0.0170742
ARFIP2	0.379906	8.91962e-08	0.439113	0.227029	0.425825	4.73724e-07
ARFRP1	0.316092	0.00382929	0.9616	0.0138622	0.484075	3.4744e-09
AASS	2.72731	1.13321e-05	-1.84077	0.019464	-1.65032	0.00341661
ARGLU1	-0.143174	0.254539	-0.41125	0.192888	-0.159327	0.170766
ARHGAP1	-0.31068	0.000392694	0.33454	0.227358	0.267534	0.00251974
ARHGAP10	0.311158	0.0080023	0.213933	0.516629	-0.0462261	0.779054
ARHGAP11A	-0.909129	0.00012776	0.127049	0.8227	0.134416	0.197688
ARHGAP11B	-0.673417	0.000356346	-0.0261071	0.974681	0.0286727	0.927029
TMEM59L	0.599469	0.0061899	-0.44036	0.340103	-1.19665	9.9234e-08
ARHGAP17	0.016197	0.879595	-0.36811	0.202479	-0.253601	0.00872182
ARHGAP18	-0.506202	2.27163e-05	-0.230474	0.655399	-0.0487712	0.816981
ARHGAP19	-0.27429	0.0312085	-0.144404	0.772435	-0.529775	4.02006e-05
ARHGAP19-SLIT1	1.12437	0.53504	-3.17148	1	-0.118349	1
ARHGAP20	1.56438	1	-1.50918	1	-0.542927	1
ARHGAP21	0.261506	0.000202237	-0.626929	0.181089	-0.0171091	0.894215
ARHGAP22	-0.785525	1.25958e-05	0.780035	0.0611439	-0.253906	0.372012
ARHGAP23	-0.486529	1.12291e-10	-0.332409	0.317805	-0.202275	0.0689798
ARHGAP24	-0.148508	0.489516	-0.559108	0.129681	-0.597663	0.00490033
ARHGAP25	0.307564	0.644551	-0.255089	0.811822	-0.0629124	0.940623
ARHGAP26	-0.585994	8.58526e-10	-0.589428	0.113724	0.141508	0.22703
ARHGAP27	-0.0295962	0.819941	-0.158907	0.606994	-0.0619341	0.641265
ARHGAP28	-0.0371117	0.979038	-1.4271	0.444918	-0.522971	1
ARHGAP29	0.558486	5.24955e-12	-0.351852	0.490799	-0.0474483	0.627412
ARHGAP30	1.11869	0.00341372	-0.337072	0.719147	-0.408649	0.313243
ARHGAP31	-0.221992	0.351948	-0.63645	0.3148	-0.970036	0.000979061
SLC22A17	0.670035	1.05717e-06	-0.366353	0.325114	-1.17724	8.98329e-17
ARHGAP33	-1.62969	1.74847e-23	-0.634869	0.117117	-0.588975	0.0134542
ARHGAP35	0.018282	0.848192	-0.389876	0.401203	0.0756617	0.494204
ARHGAP39	0.215046	0.0690077	0.0982361	0.774984	-0.0604824	0.577599
ARHGAP4	0.0501639	0.904098	0.558528	0.399794	0.0178587	0.97237
ARHGAP40	3.22419	1	-0.266934	1	0.281062	1
ARHGAP42	0.63159	1.88305e-05	-0.830136	0.0709786	-0.0882636	0.511496
ARHGAP44	-0.500428	0.000789873	-0.297497	0.385644	-0.426542	0.0150996
ARHGAP5	0.302497	2.82214e-05	-0.504444	0.54739	0.0397202	0.700063
ARHGAP6	-1.70152	1	-0.934784	1	-1.73431	1
ARHGAP8	-0.0964394	0.789579	0.402524	0.363315	-0.327976	0.321365
ARHGAP9	3.64434	1.88063e-10	-1.83249	0.0133741	0.16011	0.729556
ARHGDIA	-0.466031	9.39872e-08	0.63096	0.14869	0.449373	9.10533e-07
ARHGDIB	-0.501766	0.011836	-0.610663	0.227696	-1.32838	2.58573e-07
ARHGDIG	-0.88975	0.0124866	0.437057	0.648804	-0.949281	0.089211
ARHGEF1	-0.338218	1.15406e-06	0.298804	0.327684	0.519163	6.60094e-12
ARHGEF10	-0.226112	0.00308034	-0.103719	0.825662	-0.366149	1.46107e-05
ARHGEF10L	0.0144997	0.921899	-0.53194	0.0807923	-0.333691	0.0106232
ARHGEF11	-0.133983	0.170256	-0.402905	0.320052	-0.133198	0.207666
ARHGEF12	-0.0579048	0.471993	-0.762631	0.193271	-0.272399	0.00597775
ARHGEF16	-0.436939	0.00696776	-0.146056	0.762711	-0.300097	0.155606
ARHGEF17	-0.216143	0.0181394	-0.198232	0.636079	-0.336986	0.00231113
ARHGEF18	-0.0754169	0.424261	0.176698	0.563182	0.0506091	0.661624
ARHGEF19	0.29793	0.0294836	0.195697	0.630131	0.152114	0.395928
ARHGEF2	1.98992	3.51866e-110	-0.251534	0.374605	0.180868	0.0689406
ARHGEF25	-0.432588	0.000788975	-0.570983	0.095601	-0.230269	0.162668
ARHGEF26	-1.15812	9.45995e-13	-0.267761	0.646722	0.129521	0.596645
ARHGEF28	0.772539	1.75729e-22	-0.221186	0.539749	-0.0733299	0.464271
ALOX5	1.25765	0.00971019	-0.396159	0.648001	-1.15037	0.033661
ARHGEF33	0.102466	0.967896	0.974945	1	1.04503	1
ARHGEF35	1.11034	0.0165438	-0.0554049	0.93971	-0.200982	0.684854
COL5A1	0.460054	2.89108e-09	-0.352319	0.348825	-1.14396	2.66824e-20
ARHGEF38	0.879881	1	-1.22346	1	-2.48829	1
ARHGEF39	-1.00241	1.34222e-15	0.716353	0.0269837	0.0392406	0.844137
ARHGEF4	0.662073	0.0135291	-0.872307	0.04379	-0.20276	0.448864
ARHGEF40	-0.33393	0.00131939	-0.280861	0.451253	-0.68526	1.39268e-06
ARHGEF5	0.458386	0.0162999	-0.322822	0.43569	-0.164418	0.498552
ARHGEF6	-1.24459	0.041439	0.0381959	0.980741	0.0357808	0.976443
ARHGEF7	-0.107636	0.22276	-0.0344122	0.936366	0.0343332	0.769113
ARHGEF9	0.331737	0.0039319	-0.0146911	0.976662	-0.12597	0.396761
ARID1A	0.120716	0.234083	-0.75221	0.185323	-0.263018	0.0290011
ARID1B	-0.459881	2.52116e-08	-0.408532	0.434454	-0.20189	0.0550523
ARID2	-0.171724	0.102063	-0.42545	0.477885	-0.181076	0.129092
ARID3A	-0.0888066	0.521606	-0.248663	0.41226	-0.0127904	0.9426
ARID3B	0.484935	0.0239903	-0.23517	0.538007	0.214497	0.22974
ARID3C	-1.36034	0.371322	0.354237	1	-0.199022	1
ARID4A	0.272657	0.0211091	-0.733329	0.199446	-0.269357	0.0522469
ARID4B	-0.203624	0.0361767	-0.693074	0.176945	-0.155721	0.122162
ARID5A	-0.06468	0.716646	0.774646	0.0678324	0.0822327	0.705893
ARID5B	0.506307	0.106202	-0.179027	0.817275	0.292058	0.403248
ARIH1	0.295451	9.40567e-05	-0.177285	0.67424	-0.0127488	0.910693
ARIH2	0.118099	0.113797	0.0825173	0.787538	0.0273634	0.790296
ARIH2OS	1.20329	0.02101	-0.0793013	0.929433	0.218693	0.689432
ARL1	0.75094	1.05156e-25	0.0654316	0.839702	0.26837	0.00603761
ARL10	0.188854	0.801771	-0.161574	0.896956	-1.0866	0.172298
ARL11		1		1		1
ARL13A	0.267928	1	0.171891	1	0.726356	1
ARL13B	0.282802	0.0170922	-0.218816	0.682549	-0.00157482	0.993392
ARL14	-0.23456	0.714433	-0.0254297	0.982613	-0.270197	0.71928
ARL14EP	0.23496	0.0285364	-0.0128578	0.975376	0.290897	0.0197916
ARL14EPL	2.21202	0.0105136	-1.26437	0.38248	-1.14846	0.154513
ARL15	-0.526454	0.000653349	-0.279553	0.484387	-0.894853	1.12725e-05
ARL16	-0.279209	0.00156999	0.470273	0.265845	-0.0631299	0.607852
BDKRB1	0.717864	0.0425741	-0.756471	0.254188	-1.13848	0.00286414
ARL17B	0.316275	0.198882	-0.0423625	0.937498	-0.242209	0.363861
ARL2	-0.0915522	0.301272	1.07348	0.0225755	0.648441	5.83526e-14
ARL2BP	0.300195	0.00049384	0.275695	0.304675	0.251347	0.00262873
ARL2-SNX15	-0.540707	0.86372	-2.24053	1	-2.497	1
ARL3	-0.240837	0.0112285	0.344735	0.451598	-0.449396	1.84499e-05
ARL4A	0.154746	0.281302	0.356016	0.275785	0.0563048	0.689121
ARL4C	-0.760647	6.26137e-21	0.521457	0.0372086	-0.0176422	0.868339
ARL4D	0.100591	0.697975	-0.347624	0.376304	-0.161297	0.394181
ARL5A	-0.34023	0.000144192	-0.185974	0.646963	0.0949613	0.370486
ARL5B	0.860543	1.48906e-23	-0.525711	0.236013	-0.0855225	0.372174
ARL5C	2.84284	1	-1.62708	1	-2.74976	1
ARL6	-0.269779	0.161641	-0.123506	0.792832	-0.0568158	0.831996
ARL6IP1	-0.399545	5.1707e-06	0.00714942	0.984988	-0.0257954	0.82232
ARL6IP4	0.0753602	0.336376	0.729239	0.14946	0.343731	2.97266e-06
ARL6IP5	-0.0290424	0.81708	-0.162611	0.598198	0.0726244	0.563412
ARL6IP6	-0.0909718	0.486221	-0.131689	0.698562	0.225492	0.0577824
ELF3	0.23119	0.000501151	-0.341931	0.276418	-1.12922	2.04413e-25
ARL8B	0.296677	0.000117177	-0.0711748	0.82778	0.0790498	0.378289
ARL9	3.69366	0.0941387	-0.533648	1	-1.71471	1
ARMC1	-0.193814	0.0528983	0.0628281	0.896118	-0.0314712	0.812279
ARMC10	0.206864	0.0100866	0.185102	0.513142	0.198508	0.0217649
ARMC12	-0.529385	0.525151	0.590736	0.668044	0.410019	0.678562
ARMC2	0.493517	0.227856	0.224741	0.719297	-0.14124	0.77182
ARMC3	-0.249667	0.776206	-0.433295	0.771346	0.407003	0.676585
ARMC4	-2.14012	0.232496	0.135675	1	-0.30151	1
ARMC5	-0.133008	0.355345	0.0101959	0.987083	0.277221	0.0372841
ARMC6	-0.234587	0.0184933	0.813491	0.037428	0.456093	1.16838e-07
ARMC7	-0.724444	7.61719e-13	-0.326715	0.472416	-0.0882432	0.58268
ARMC8	-0.0363637	0.823712	0.0812218	0.847088	-0.0333415	0.85689
ARMC9	-0.143916	0.241836	-0.239607	0.452584	-0.242756	0.0604296
ARMCX1	0.985773	0.00465646	-0.188749	0.775925	0.29947	0.399344
ARMCX2	0.10129	0.964692	0.656264	1	-2.77961	1
ARMCX3	0.887164	9.67992e-20	0.0488874	0.894246	0.796971	1.97823e-16
ARMCX4	0.182088	0.657242	-0.147413	0.869452	-0.356834	0.429769
ARMCX5	0.686331	1.61098e-08	0.0138239	0.976662	0.402994	0.000380483
ARMCX5-GPRASP2	-0.637989	0.258416	-3.77002	0.0336208	-1.1028	0.182145
ARMCX6	0.491483	5.80766e-06	0.390297	0.302217	0.588474	7.87248e-06
ARMH1	-0.329103	0.635242	0.937395	0.379387	-0.568844	0.513213
ARMH3	-0.213461	0.0415941	0.000783391	0.998294	0.152381	0.195787
ARMH4	-0.663777	0.490493	-0.952558	0.601962	-0.352668	1
ARMS2	0.0527309	1	-0.361823	1	-1.02598	1
ARMT1	0.111531	0.377314	-0.0648918	0.874889	0.0232692	0.890189
ARNT	0.258671	0.00444996	-0.0941053	0.823585	-0.210665	0.0542916
ARNT2	-0.0088336	0.937358	-0.592957	0.164745	-0.298308	0.00094049
ARNTL	0.956165	1.85829e-11	-0.319233	0.302592	0.0106663	0.94749
ARNTL2	-0.000514762	0.996992	-0.0981081	0.818886	0.631361	4.66596e-06
ARPC1A	0.0714881	0.401107	-0.03153	0.950465	0.136211	0.135811
ARPC1B	0.204352	0.00534392	0.0546876	0.90711	0.187813	0.00822026
ARPC2	0.033914	0.675896	0.378568	0.293944	-0.0254487	0.786327
ARPC3	0.142974	0.084052	0.36508	0.367638	0.0485109	0.635202
ARPC4	-0.200863	0.00268746	0.299045	0.559245	0.135338	0.096508
ARPC4-TTLL3	-0.300652	0.537434	-0.963052	0.133177	-1.26585	0.00655597
ARPC5	-0.0317255	0.748073	-0.225257	0.419901	-0.039372	0.717421
ARPC5L	-0.651753	1.35035e-13	0.418507	0.27157	0.332879	0.00274773
ARPIN	-0.10304	0.321062	-0.232021	0.503732	-0.202391	0.134017
ARPIN-AP3S2	0.0112786	0.942099	0.302843	0.314556	0.0721262	0.583933
ARPP19	-0.309353	0.000284017	-0.0455376	0.928497	0.161513	0.0738099
ARPP21	0.45289	0.737495	0.412885	0.815148	-1.31882	1
ARRB1	-1.53959	5.95803e-33	-0.571167	0.132748	-1.15656	3.37487e-05
ARRB2	-0.0655137	0.592901	0.0488137	0.914031	-0.427289	0.000109479
ARRDC1	-0.0123141	0.935704	0.113773	0.823498	0.117017	0.352916
ARRDC2	0.0504498	0.748708	0.0813655	0.854578	0.0817777	0.467927
ARRDC3	0.300263	0.0376534	-0.136707	0.814066	0.21353	0.202642
ARRDC4	-0.00454606	0.99219	-0.837422	0.141758	-0.942658	0.026452
ARSA	0.525877	5.36196e-08	0.348428	0.448582	-0.0835309	0.526043
ARSB	-0.427056	1.11176e-06	-0.221394	0.462021	-0.387115	0.00100562
ARSD	0.859996	6.52681e-28	-0.261173	0.387174	-0.00113824	0.994744
ARSG	1.46862	2.6049e-11	0.0645856	0.901548	-0.304164	0.163043
ARSI	-0.405298	6.06412e-05	-0.14397	0.699638	-0.696144	6.23106e-09
ARSJ	-0.402704	8.53357e-05	-0.0721887	0.903567	0.114825	0.402254
ARSK	-0.222076	0.251635	-0.578069	0.268357	-0.129988	0.55146
ARSL	-0.137722	0.194939	0.290336	0.425203	0.0125513	0.930122
ART4	0.336212	1	-0.89299	1	-1.97031	1
ART5	-0.470841	0.692736	0.673859	0.688785	-0.859621	1
ARTN	-0.348641	0.73338	0.181737	0.910554	-1.2577	1
ARV1	-0.227399	0.0517484	0.194327	0.61857	0.176876	0.199924
ARVCF	0.303365	0.103759	-0.306722	0.416616	-0.539036	0.00812438
ARX	1.20238	7.42033e-05	-0.988839	0.0591467	-0.329239	0.326536
AS3MT	-1.29004	6.8162e-17	0.0987341	0.853326	-0.565516	0.0146891
TACR1	1.66534	0.000128049	-0.335395	0.59346	-1.12001	0.0149785
ASAH2	0.677983	0.0611588	-0.602942	0.446512	-0.350527	0.381021
ASAH2B	0.507193	0.000480607	-0.0409631	0.911588	0.187218	0.256915
ASAP1	0.00200057	0.983334	-0.541041	0.247284	-0.296019	0.000279829
CX3CL1	0.976886	0.0149544	-1.9285	0.00314822	-1.63833	0.000384673
ASAP3	-0.0616849	0.730682	-0.38142	0.300191	-0.624939	0.000647733
ASB1	0.541593	3.1105e-15	-0.135843	0.636298	0.129883	0.125557
ASB12	-2.82329	1	3.37108	1	1.35489	1
ASB13	-0.0877319	0.453134	0.160182	0.628956	-0.0466364	0.741967
ASB14	0.65974	0.476675	-0.731877	0.604143	-0.68739	1
ASB16	-0.0161606	0.97602	-0.549009	0.486342	0.028831	0.960462
ASB18	-1.6508	1	-0.157343	1	-0.226171	1
ASB2	1.7655	0.000335201	1.1145	0.0652678	0.197431	0.694615
ASB3	0.35061	0.00425894	-0.331261	0.335469	0.015034	0.932753
ASB4	-3.88736	1.13888e-06	-2.18871	1	0.958723	1
ASB5	-0.522425	1	-0.742724	1	-0.575653	1
ASB6	-0.403678	9.69359e-06	0.242282	0.470682	0.188865	0.0829026
ASB7	0.533991	5.93915e-08	-0.184468	0.657991	-0.0514618	0.715411
ASB8	0.367743	0.00155149	0.00144817	0.997239	0.134806	0.28728
ASB9	-0.83527	3.2193e-18	-0.0503768	0.912688	0.0261833	0.896428
ASCC1	-0.151716	0.108253	-0.236138	0.398366	-0.0921975	0.384505
ASCC2	0.152706	0.0862721	0.252467	0.464963	-0.00562233	0.965351
ASCC3	-0.255903	0.0135437	0.00157063	0.998294	-0.0924397	0.325851
ASCL1	-0.299651	1	-0.66961	1	-1.60173	1
ASCL2	-2.64684	1	0.568348	1	-0.171418	1
ASCL3	0.617333	1	-1.39449	1	-1.55332	1
ASCL5	0.749521	0.285823	-1.2677	0.253441	-0.222705	0.798518
ASDURF	1.57731	0.064823	0.062521	0.944922	0.291568	0.643675
ASF1A	0.402457	0.000231256	-0.521118	0.0473281	0.0243999	0.869812
ASF1B	-2.85317	4.42336e-95	0.566679	0.122748	0.273328	0.125773
ASGR1	0.344379	0.468269	0.142535	0.881094	0.0435524	0.942386
ASGR2	-3.00989	1		1		1
ASH1L	-0.302307	0.00321895	-0.575129	0.437262	-0.0426932	0.794739
ASH2L	0.584421	8.384e-10	0.0837205	0.831151	0.071516	0.537298
ASIC1	-1.5447	1.0501e-36	0.101303	0.811822	-0.441695	0.0484891
ASIC2	-0.366048	0.400001	0.332005	0.634897	-0.537652	0.29852
ASIC3	-0.397399	0.0461043	0.338635	0.466121	0.0771195	0.794739
ASIC4	2.55813	0.00215893	-0.545764	0.636079	-0.0999123	0.911133
ASIP	2.16916	1	-2.72885	1	-1.90927	1
ASL	0.736496	1.24312e-10	0.480735	0.325808	-0.020087	0.882858
ASMT	1.5768	0.256011	0.49916	0.775093	0.193407	1
ASMTL	-0.145838	0.188203	0.16413	0.703895	0.10932	0.415984
ASNS	1.43193	2.39181e-27	-1.28058	1.3834e-07	0.412873	0.000148756
ASNSD1	0.0401253	0.722562	0.227825	0.444175	0.251388	0.018273
ASPDH	1.43109	1	-2.07923	1	-2.19682	1
ASPG	-0.0187029	1	1.48129	1	-0.269216	1
ASPH	0.428534	3.05228e-09	-0.348668	0.31281	0.400177	5.86856e-08
ASPHD1	0.0885986	0.56544	0.437219	0.325421	-0.238851	0.0853542
ASPHD2	0.398374	0.0765293	0.238419	0.558746	0.350308	0.204953
ASPM	-1.34683	4.75422e-28	-0.0573846	0.93206	0.216872	0.0403156
ASPRV1	-1.34456	0.0243269	0.936971	0.333057	-0.140866	0.904961
ASPSCR1	0.231518	0.00555113	0.377853	0.43806	0.134572	0.22208
ASRGL1	-1.47192	5.26612e-30	0.502794	0.261248	-0.204379	0.361111
ASS1	0.625605	1.29125e-10	-0.0688857	0.876397	-0.153695	0.167736
ASTE1	-0.100516	0.665657	-0.076818	0.873759	-0.263254	0.30551
ASTN1	0.895142	1	-0.699009	1	0.068397	1
ASTN2	-0.190345	0.318579	0.339534	0.374605	-0.223972	0.296319
ASXL1	-0.131979	0.0783924	-0.131517	0.751878	-0.0212894	0.842817
ASXL2	0.196451	0.0162691	-0.40342	0.569807	0.0328523	0.819353
ATAD1	0.532294	9.73552e-08	0.149892	0.701354	0.084199	0.453983
ATAD2	-1.92383	1.10437e-116	-0.142197	0.810447	0.0678134	0.601301
ATAD2B	-0.215166	0.123215	-0.58419	0.277925	-0.0657148	0.675227
ATAD3A	-0.645709	6.42744e-12	0.826265	0.0370165	0.199433	0.0850111
ATAD3B	-0.344775	0.517295	1.35998	0.102396	-0.197692	0.782056
ATAD5	-1.76876	1.21896e-51	-0.219791	0.699589	-0.069396	0.759524
ATAT1	0.121158	0.569523	0.0763593	0.877864	0.0211466	0.940623
ATCAY	-0.594553	0.516399	-0.646586	0.699062	-1.90112	1
ATE1	0.281321	0.000849339	-0.287981	0.543232	-0.161731	0.0948735
ATF1	0.427699	8.11326e-06	-0.0656119	0.854429	0.332492	0.00104356
ATF2	0.855402	6.29889e-25	-0.112622	0.797871	-0.00632998	0.96157
ATF3	4.35078	6.13364e-42	-1.10995	8.92524e-06	-0.00755403	0.960189
ATF4	1.565	1.6796e-126	-1.27968	9.30228e-07	0.318463	0.000161927
ATF5	-0.838177	6.46584e-15	0.0604631	0.903261	0.523045	1.65534e-07
LCN12	2.33441	8.37979e-24	0.162016	0.809912	-1.11907	3.40389e-08
ATF6B	0.640512	6.87991e-16	-0.28125	0.298486	0.259767	0.00114307
ATF7	0.364384	3.84609e-05	-0.135465	0.763225	0.00411975	0.978492
ATF7IP	-0.435891	1.47204e-06	-0.547418	0.24314	-0.197924	0.182433
PAQR8	2.14472	8.7643e-34	-0.597141	0.201571	-1.11406	6.18172e-09
ATF7-NPFF	0.233327	0.651872	-0.0582887	0.95476	-0.257169	0.634073
ATG10	-0.239094	0.074651	0.19225	0.600562	-0.153127	0.399746
ATG101	0.413284	2.19667e-07	0.521277	0.229915	0.344806	7.08017e-05
ATG12	0.432046	1.43949e-05	0.274379	0.362435	0.267974	0.00623807
ATG13	1.15678	4.79393e-76	-0.0863837	0.776953	0.149735	0.0361776
ATG14	0.6067	2.7154e-09	-0.440706	0.300191	-0.163703	0.163042
ATG16L1	-0.208799	0.0051623	0.0587654	0.854429	-0.00976503	0.934581
ATG16L2	-0.321243	0.0936212	-0.348378	0.350117	0.0832254	0.701807
ATG2A	0.348554	0.000334704	-0.240169	0.454104	0.377781	9.19143e-06
ATG2B	-0.00234949	0.985089	-0.569437	0.305424	-0.0261214	0.860288
ATG3	0.250405	0.00599274	0.343719	0.291543	0.212787	0.0217983
ATG4A	0.353337	0.064823	-0.578237	0.0705905	-0.205565	0.180463
ATG4B	0.0719238	0.403499	0.436203	0.308806	0.171853	0.0746844
ATG4C	-0.189484	0.247046	0.0483417	0.912339	0.0778146	0.719001
ATG4D	0.329546	0.00440886	0.0667286	0.90224	-0.0376957	0.820069
ATG5	0.093268	0.47911	0.251418	0.495804	0.322476	0.00515963
ATG7	0.297566	0.0100542	0.34327	0.350656	0.53471	3.26071e-07
ATG9A	-0.111403	0.25649	0.127507	0.67424	0.280479	0.00046648
ATG9B	0.744784	0.191604	-0.6592	0.495518	-0.171562	0.810903
ATIC	-0.126029	0.154113	0.430283	0.131211	0.17435	0.0549625
ATL1	-0.0874482	0.653849	-0.147953	0.750619	-0.736278	0.000373402
ATL2	-0.455188	4.46112e-08	-0.0621234	0.900551	0.156002	0.107943
ATL3	-0.185384	0.0328489	0.061774	0.872511	0.344719	3.17608e-05
ATM	0.124	0.325233	-0.405869	0.545029	0.0789564	0.5516
ATMIN	0.184546	0.0282044	-0.105393	0.78349	0.0760056	0.412654
ATN1	-0.171328	0.035268	-0.0615923	0.853326	0.0722943	0.463256
ATOH7	0.0711893	0.967048	-0.180821	1	-0.445371	1
ATOH8	-0.278147	0.416765	0.506317	0.296097	-0.316149	0.266678
ATOX1	-0.362358	0.000851092	0.55504	0.291207	0.0273594	0.864038
ATP10A	-0.296484	0.00708006	0.248033	0.466978	-0.710216	1.57051e-07
ATP10D	0.0498569	0.8083	-0.308041	0.424021	-0.253143	0.205119
ATP11A	-0.738429	2.24769e-12	-0.407147	0.5078	-0.0414766	0.81414
ATP11B	0.253009	0.00569539	-0.476832	0.338016	-0.111301	0.331122
ATP11C	-0.522641	1.58445e-07	-0.491002	0.337476	-0.232495	0.0484891
ATP12A	0.148369	0.936282	-1.53681	1	-2.44942	1
ATP13A1	0.0654862	0.466285	0.201912	0.542748	-0.00722863	0.952756
ATP13A2	-0.188804	0.150859	0.110679	0.809358	-0.16975	0.203975
ATP13A3	-0.0769537	0.412181	-1.16762	0.0390487	-0.375823	2.71771e-05
ATP13A4	-0.0602395	1	0.651028	1	-0.301382	1
ATP1A1	0.023177	0.788148	-0.0698094	0.826501	-0.0930918	0.258582
ATP1A2	3.16763	1.59747e-08	-1.26572	0.0775724	-0.209816	0.698847
ATP1A3	-0.505379	0.00245341	-0.198841	0.621855	-0.629584	0.00458927
KCNT2	1.58887	0.000287432	-2.50478	0.000417942	-1.53237	0.00152555
ATP1B2	1.13522	0.325494	-2.7699	0.163787	-0.0354026	0.979515
ATP1B3	-0.0234596	0.865001	0.0405469	0.917084	0.00256262	0.985851
ATP23	-0.944484	1.6585e-06	0.171327	0.750619	-0.125578	0.726181
ATP2A1	-0.192597	0.608749	-0.582958	0.356858	-0.123749	0.791975
NECTIN4	0.84657	0.0267019	0.183411	0.774602	-1.10984	0.00890116
RGL1	1.90007	1.25893e-43	-1.54269	5.23267e-06	-1.45531	1.0459e-18
ATP2B1	1.17735	1.91199e-60	-0.736247	0.145281	0.0738992	0.325147
ATP2B2	-0.635898	1	1.74511	1	0.754262	1
ATP2B3	-1.64738	0.193488	0.873547	1	-2.67201	1
ATP2B4	-0.825127	2.00356e-14	-0.889467	0.0775724	-0.838187	1.17155e-05
ATP2C1	0.129864	0.0744477	-0.416604	0.254887	-0.14206	0.0860441
ATP2C2	0.426222	0.588462	-0.767286	0.538988	0.00712221	0.995112
ATP4A	2.36399	1	-2.15472	1	1.52326	1
ATP5F1A	-0.243933	0.00082603	0.219294	0.479104	0.060679	0.478295
ATP5F1B	-0.198556	0.00320317	0.44123	0.139692	0.142363	0.0533047
ATP5F1C	-0.15179	0.101781	0.377215	0.291295	0.0775015	0.447812
ATP5F1D	-0.0717821	0.378974	0.887428	0.141727	0.374649	3.29652e-06
ATP5F1E	0.108685	0.277409	0.517177	0.303854	0.0588031	0.630161
ATP5IF1	-0.391988	2.88226e-05	0.439902	0.361751	0.0977741	0.41498
ATP5MC1	-0.52037	3.21699e-07	0.687842	0.133796	0.29239	0.00171972
ATP5MC2	0.377546	1.73204e-06	0.647977	0.14302	0.287357	0.000369486
ATP5MC3	-0.683167	1.0665e-21	0.550972	0.157903	0.10319	0.299163
ATP5MD	-0.269003	0.0138131	0.421147	0.465179	0.198183	0.157096
ATP5ME	-0.0766794	0.579232	0.558839	0.35819	0.124062	0.467927
ATP5MF	-0.533088	1.43945e-09	0.500964	0.31755	0.0952736	0.423495
ATP5MF-PTCD1	-0.338722	0.0490587	-0.0979177	0.878402	0.156622	0.398383
ATP5MG	-0.233173	0.0280627	0.377607	0.404252	0.129144	0.296478
ATP5MPL	-0.169466	0.0328065	0.358048	0.492549	0.00817602	0.955452
ATP5PB	-0.125862	0.158661	0.460339	0.204316	0.110462	0.289872
ATP5PD	0.0116214	0.93162	0.542525	0.226779	0.2716	0.0162708
ATP5PF	-0.166096	0.0554424	0.51933	0.261912	0.151481	0.175639
ATP5PO	0.0192452	0.861697	0.635492	0.159574	0.174985	0.119236
TMEM225B	1.39974	0.00167247	0.296223	0.661288	-1.10405	0.00611262
ATP6AP1L	1.78612	0.00187211	0.0234212	0.982192	0.0242657	0.97413
ATP6AP2	0.456376	1.2534e-12	-0.227121	0.444175	-0.130778	0.0899036
DNAH11	0.985298	0.0172356	-0.774183	0.314556	-1.09832	0.0163176
PDIA4	3.05177	0	-0.0125569	0.975967	-1.09731	9.86427e-63
ATP6V0A4	1.26376	0.0285277	-0.651545	0.45501	-0.568768	0.400403
ATP6V0B	0.252917	0.00582981	0.306857	0.539749	0.140662	0.165072
ATP6V0C	0.0984605	0.386594	0.10282	0.856191	-0.205628	0.00841319
ATP6V0D1	0.0696323	0.575092	-0.0863393	0.841799	-0.0710922	0.505162
ATP6V0D2	5.5374	1.32025e-46	-2.4241	1.46355e-12	0.195938	0.362323
ATP6V0E1	-0.143708	0.150221	0.144784	0.786795	0.000255545	0.99919
ATP6V0E2	-0.544851	1.3404e-14	0.451348	0.302505	-0.220078	0.0120639
ATP6V1A	-0.113617	0.248225	-0.288724	0.463914	-0.0675031	0.52742
ATP6V1B1	0.199717	0.684288	0.305561	0.752353	-0.295925	0.62248
ATP6V1B2	-0.0553653	0.627057	-0.143115	0.638486	0.092475	0.313429
PTPRB	1.17895	3.51382e-05	-1.64708	0.0217577	-1.44659	2.71771e-05
ATP6V1C2	1.07515	5.50702e-07	0.585099	0.244192	-0.231314	0.345456
ATP6V1D	0.426022	1.03955e-05	0.0600991	0.882949	0.0631092	0.585951
ATP6V1E1	0.275734	0.00345619	0.167058	0.712412	0.112549	0.245692
ATP6V1E2	-0.352863	0.00881084	-0.0194252	0.965396	0.187527	0.195858
ATP6V1F	0.23089	0.00513892	0.367864	0.44705	0.0151352	0.896355
ATP6V1FNB	0.662352	0.148625	-0.873838	0.265692	-0.361289	0.517675
ATP6V1G1	0.447201	2.7678e-05	0.032929	0.938589	0.0129147	0.93591
ATP6V1G2	0.117906	0.85555	-0.461198	0.621863	-0.602898	0.423495
ATP6V1G2-DDX39B	0.207472	0.412874	-1.16536	0.0269382	-0.333694	0.165056
AC005324.3	0.992527	0.000561373	-0.846666	0.129769	-1.09694	4.71802e-05
ATP7A	-0.373637	2.789e-05	-1.01507	0.0440167	-0.422653	0.000204801
ATP7B	-0.250868	0.0959365	-0.64079	0.182673	-0.646853	8.97321e-05
ATP8A1	-0.481706	0.411561	-1.75981	0.122492	-0.686675	0.393785
ATP8A2	1.48755	1	-2.43944	1	-1.86204	1
ATP8B1	-0.0144119	0.935704	-0.268968	0.640124	-0.871629	1.45917e-11
ATP8B2	-0.18217	0.03771	-0.452517	0.203614	-0.367353	0.00302114
ATP8B3	-0.349355	0.0547442	-0.166592	0.722744	-0.0913583	0.680245
ATP8B4	-0.592661	0.308636	-1.3389	0.219541	-1.08509	0.129652
ADGRA2	0.612633	2.50156e-05	-0.776117	0.0377038	-1.42583	0.00118783
IL21R	2.69521	1.8605e-11	-3.42524	2.41496e-09	-1.40336	0.000462526
ATPAF1	-0.415268	2.85317e-07	0.0377807	0.914126	0.0255626	0.859246
ATPAF2	0.174725	0.0889314	0.316037	0.416874	-0.0429936	0.754512
ATPSCKMT	0.0709725	0.618983	-0.155943	0.66171	-0.284052	0.0614023
ATR	-0.365132	0.000352717	-0.241204	0.640817	0.14635	0.204626
ATRAID	0.14113	0.0958043	0.472859	0.250098	0.0878089	0.297304
ATRIP	-1.10228	1.06806e-16	0.403451	0.280795	0.217679	0.206989
ATRN	0.0794181	0.39729	-0.52642	0.208566	-0.206263	0.00910161
ATRNL1	-0.721989	0.191194	-0.41244	0.70561	-0.56446	0.483367
ATRX	-0.130715	0.109068	-0.33614	0.601962	0.0682031	0.455976
SYT1	1.81823	5.12896e-79	-1.16998	0.000753989	-1.34208	2.37865e-24
ATXN10	-0.0351724	0.740776	0.203701	0.491328	-0.2693	0.000908179
ATXN1L	-0.162025	0.0429981	-0.174641	0.806659	0.14679	0.160833
ATXN2	0.511701	2.80277e-12	-0.226282	0.543681	-0.0726797	0.491744
ATXN2L	0.612273	1.00432e-15	-0.423846	0.0976811	0.116785	0.180203
ATXN3	0.612254	9.90486e-08	0.00815812	0.984044	-0.165126	0.187005
ATXN7	0.257625	0.209287	-0.688775	0.302412	0.163352	0.383001
ATXN7L1	0.0738168	0.724589	-0.401843	0.407082	-0.55095	0.00330657
ATXN7L2	-0.158974	0.517624	0.540895	0.302592	0.253569	0.313716
ATXN7L3	-0.231899	0.00150408	-0.0284323	0.938517	0.140995	0.0962559
ATXN7L3B	0.0737761	0.452286	-0.0989496	0.846393	0.244968	0.00482415
DOCK2	0.473289	0.0206587	0.564378	0.117585	-1.07912	3.16796e-06
AUNIP	-1.30649	2.47421e-12	0.449113	0.296124	0.462508	0.0543305
AUP1	0.23822	0.000121266	0.641691	0.111284	0.187491	0.00744035
AURKA	-1.36904	1.89407e-33	0.384935	0.185283	0.234158	0.0239286
AURKAIP1	-0.284875	0.000455527	0.914301	0.0769993	0.284103	0.000171782
AURKB	-1.5122	1.65357e-45	1.18052	0.000361796	0.503476	1.2181e-05
AURKC	0.972319	0.183399	1.00485	0.295275	-0.322274	0.699307
AUTS2	-0.0841795	0.642125	-1.221	0.00491828	-1.04201	5.59217e-07
AVEN	0.996719	6.99371e-35	0.708535	0.029329	-0.0269557	0.814157
AVIL	0.0406504	0.96325	-0.658653	0.559588	-0.253192	0.786372
AVL9	0.373079	1.14292e-06	-0.324542	0.429663	0.13323	0.128794
AVPI1	-0.188978	0.0694019	0.447954	0.285489	0.413894	6.02408e-06
AVPR1A	-1.20119	0.383945	-0.0331727	1	-0.570454	1
AVPR2	0.860287	1	-2.0873	1	-1.33697	1
AWAT2		1		1		1
AXDND1	-0.837759	0.59162	-0.91985	1	1.38543	1
AXIN1	0.361635	1.32723e-05	0.13398	0.673339	0.0568473	0.592145
AXIN2	-2.62144	3.00454e-19	-1.64514	0.0207865	-1.05839	0.0394478
AXL	0.775586	4.1886e-30	0.345986	0.198926	0.359121	1.01618e-06
AZGP1	1.86283	0.278039	-2.47647	1	-1.37134	1
AZI2	0.903026	1.51318e-24	-0.154601	0.589557	0.311936	0.000244101
AZIN1	0.156506	0.0774381	-0.232914	0.596029	0.159937	0.0485482
AZIN2	0.21936	0.556386	-0.639311	0.253761	-0.792727	0.0332013
AZU1	-0.727295	0.601701	0.586156	0.75318	-0.175459	1
B2M	0.135174	0.103656	0.276514	0.453057	0.073361	0.487173
B3GALNT1	-0.237512	0.7252	-0.190993	0.867479	-1.13965	0.157214
B3GALNT2	0.244465	0.00245422	-0.431237	0.190239	0.26181	0.00258763
B3GALT1	0.429493	1	-3.58991	1	-3.74517	1
B3GALT2	-0.9246	1	0.225022	1	-0.823051	1
B3GALT4	0.779496	0.0380681	-0.409502	0.550668	-0.547349	0.198512
B3GALT5	-0.521669	0.0107704	-0.938569	0.0459172	-0.180509	0.603604
B3GALT6	0.424361	2.01653e-06	0.339608	0.39596	0.0438766	0.698967
B3GAT1	-0.875253	1	-2.32662	1	0.960267	1
B3GAT2	0.322064	0.645003	-0.0104256	0.993479	-0.581318	0.460634
B3GAT3	-0.519837	8.10894e-08	0.333981	0.53807	-0.00350053	0.985137
B3GLCT	-0.15621	0.218728	-0.318236	0.312856	-0.55926	4.28772e-05
B3GNT10	-0.0955109	0.764026	-0.140704	0.81437	0.438902	0.129166
B3GNT2	-0.201177	0.104878	-0.308422	0.44443	-0.168933	0.11516
B3GNT3	-0.522703	0.000188458	0.110233	0.795078	0.57772	0.000119866
B3GNT4	-0.526945	0.22208	-0.166013	0.867479	0.0441993	0.942136
B3GNT5	0.75325	3.24097e-07	-0.578844	0.120507	-0.14659	0.334819
B3GNT6	-2.17017	0.144617	-0.3421	1	-1.00627	1
B3GNT7	-0.685086	0.00137346	-1.15594	0.0124126	-1.43556	3.44351e-06
B3GNT8	-0.611057	0.688256	0.588854	1	-0.097184	1
B3GNT9	0.181725	0.168137	0.212665	0.490799	0.245147	0.0731925
B3GNTL1	-0.0628449	0.751126	0.0969744	0.83821	-0.0662731	0.780033
B4GALNT1	-0.795054	1.94778e-17	-0.637579	0.0369892	-0.34191	0.00129088
SEL1L	2.64586	1.94781e-296	-0.85474	0.10358	-1.0503	2.25872e-37
B4GALNT3	-0.280995	0.595376	-0.49037	0.56967	-0.116743	0.878331
B4GALNT4	-1.42211	1.1029e-28	0.111454	0.82914	-0.725095	1.96395e-06
B4GALT1	0.086744	0.272893	-0.538997	0.0693592	-0.135207	0.0681766
B4GALT2	-0.166773	0.0436434	0.705077	0.0523246	0.128432	0.154249
B4GALT3	0.407543	7.02081e-07	-0.180791	0.645733	0.342017	0.000110324
B4GALT4	-0.725984	3.6502e-15	0.329262	0.266331	-0.496647	3.62342e-06
B4GALT5	-0.187349	0.0048682	-0.525249	0.273445	-0.249704	0.0125739
B4GALT6	0.17884	0.112718	-0.677306	0.177553	0.0684931	0.682228
B4GALT7	0.288642	0.00367369	0.369352	0.363315	0.284158	0.00193175
B4GAT1	-0.616054	4.795e-09	0.0320469	0.936866	-0.00695107	0.965849
B9D1	0.801512	7.12183e-20	0.557994	0.181707	0.280078	0.00182221
B9D2	-0.232595	0.133546	0.619497	0.26293	0.161459	0.35925
BAALC	0.349039	1	-1.12887	1	-1.21714	1
BAAT	-1.42562	4.20473e-07	0.50799	0.388945	-0.861547	0.0638164
BABAM1	-0.100316	0.340335	0.464711	0.327197	0.194018	0.0521325
BABAM2	0.392672	3.19943e-06	0.594007	0.122059	0.0303066	0.794739
BACE1	-0.818885	2.15549e-11	-0.463984	0.261248	-0.422816	0.0213313
BACE2	-0.40087	0.000218046	0.451328	0.133193	0.175406	0.136151
BACH1	1.13019	1.17335e-36	-0.697151	0.212269	0.0306518	0.794389
BACH2	1.17538	0.1217	-1.53955	0.196847	-0.750405	0.348461
BAD	-0.294872	0.000271786	0.774357	0.16037	-0.0362856	0.770846
BAG1	-0.142974	0.0785609	0.498655	0.210243	0.0257361	0.816428
BAG2	0.0267666	0.786202	-0.198696	0.522001	-0.108162	0.281213
BAG3	0.604001	0.320918	-0.946369	0.00862854	0.0559498	0.870475
BAG4	-0.287297	0.00741338	0.0132723	0.977773	0.113607	0.361111
BAG5	-0.077135	0.398206	0.135674	0.71945	0.205142	0.012564
BAG6	0.00792448	0.934285	-0.0376473	0.908892	0.225401	0.00262428
BAHCC1	-0.729574	0.00487814	-0.555112	0.238734	-0.339868	0.00431125
BAHD1	-0.432505	7.39651e-05	-0.444643	0.151671	-0.125755	0.34708
BAIAP2	0.0941658	0.359694	0.123173	0.742283	-0.011121	0.937225
IL32	0.908912	4.97751e-13	0.488836	0.345529	-1.0462	7.68848e-16
BAIAP2L2	0.301808	0.0201134	0.383598	0.403693	0.342667	0.00970036
BAIAP3	0.312821	0.428104	-0.737322	0.160654	-0.391144	0.252459
BAK1	-0.247506	0.0289606	0.512584	0.138309	0.556454	4.10483e-08
BAMBI	-0.394403	0.0196067	-0.44188	0.215405	-0.278871	0.0525752
BANF1	-0.388966	1.28556e-06	0.611232	0.189832	0.233523	0.00882283
BANK1	-0.323341	0.196306	-0.321546	0.496144	-0.850991	0.0022397
BANP	0.531445	0.000169196	0.189342	0.702381	0.228861	0.0728625
BAP1	-0.209136	0.0104952	0.167971	0.589647	0.133228	0.127554
BARD1	-1.49354	2.66368e-25	-0.382661	0.410227	-0.481331	0.0235847
BARHL1	2.01201	1	-0.120359	1	0.401324	1
BARX1	-0.85148	8.19876e-13	0.690927	0.217111	-0.650091	0.00226761
BASP1	-0.775132	2.14088e-31	0.261555	0.328614	0.305391	1.18565e-05
BATF	0.969684	1	-0.768346	1	1.55134	1
BATF2	-0.165226	0.7053	0.576543	0.343336	0.776006	0.0168434
BATF3	0.260578	0.092967	0.660954	0.219827	-0.0797418	0.690887
BAX	-0.080016	0.318292	0.565562	0.19505	-0.0189362	0.856077
BAZ1A	-0.439142	3.53094e-10	-0.316067	0.48818	-0.286183	0.000723914
BAZ1B	-0.691434	8.37887e-27	-0.098805	0.86291	0.0442416	0.645831
BAZ2A	-0.000586602	0.995469	-0.344609	0.477857	0.134526	0.216269
BAZ2B	-0.0250968	0.857161	-0.724741	0.244192	-0.382681	0.00194333
BBC3	1.62	2.99698e-31	0.0644208	0.910554	0.174513	0.148654
BBIP1	0.568113	1.88484e-07	-0.105372	0.778532	-0.0422094	0.795672
BBOF1	0.510046	0.0218662	-0.136446	0.769733	0.0348616	0.919199
BBOX1	-1.77477	1	2.46354	1		1
BBS1	0.106855	0.489073	-0.137114	0.737008	0.0499132	0.800934
BBS10	0.337361	0.0247226	-0.342204	0.38574	0.0583492	0.758168
BBS12	1.01133	1.1432e-07	-0.312501	0.402692	0.163579	0.420262
BBS2	0.297024	0.0013193	-0.153184	0.624507	-0.136766	0.187393
BBS4	-0.344378	0.000470354	-0.175574	0.611683	-0.0210723	0.909656
BBS5	-0.12796	0.435045	-0.00550113	0.990611	-0.113881	0.537298
BBS7	-0.0213084	0.902178	-0.0911188	0.822409	-0.0833365	0.670181
BBS9	0.553827	0.00025372	-0.291533	0.38434	-0.081579	0.678423
BBX	-0.0492811	0.628224	-0.425992	0.466881	0.0936557	0.368587
BCAM	-1.62128	4.26238e-91	0.261585	0.518038	-1.11209	1.10677e-13
BCAN	-1.39832	0.264559	1.05796	1	0.829147	1
BCAP29	0.187983	0.128921	0.0245752	0.95422	0.00972394	0.954214
BCAP31	0.0698565	0.403232	0.374115	0.373189	-0.0400374	0.637039
BCAR1	-0.345334	7.56566e-05	0.270949	0.455601	0.100097	0.353485
BCAR3	0.465865	1.46437e-08	0.509826	0.0417523	0.337748	7.08733e-05
BCAS1	-2.42046	1.43878e-20	-0.104165	0.918454	-1.73933	0.00821093
BCAS2	0.369763	0.00349761	0.19076	0.630999	0.270349	0.0295468
EPHA4	0.687167	0.0223372	-0.975273	0.0775724	-1.04466	0.000944967
BCAS4	-0.235621	0.012629	0.388051	0.347207	-0.229777	0.0305787
NRP2	0.53791	3.30329e-13	-0.870046	0.0266634	-1.3033	6.66284e-06
BCAT2	-0.283737	0.000259043	0.381112	0.396843	0.295195	0.0101452
BCCIP	-0.355496	2.58903e-05	0.564565	0.14302	0.279944	0.00571156
BCDIN3D	0.293934	0.122257	-0.171862	0.698327	-0.0905343	0.662952
BCHE	-0.617872	0.0528772	-1.59297	0.00789355	-0.391996	0.337507
BCKDHA	0.586193	5.02117e-14	0.388777	0.299032	0.240702	0.0115596
WNT5B	0.743976	0.0168483	-0.227638	0.697995	-1.03534	0.00403072
BCKDK	0.000271118	0.99755	0.724808	0.0946576	0.241223	0.00596175
BCL10	1.19228	1.29446e-22	-0.412318	0.143577	-0.0243412	0.881885
BCL11A	-0.251482	1	-1.82024	1	0.372119	1
BCL11B	-1.54534	1.99815e-05	-0.0790094	0.933327	-0.484874	0.483554
BCL2	-0.138803	0.762991	-0.0179774	0.981165	-0.199128	0.667692
BCL2A1	-0.00158888	0.994618	0.80055	0.0480793	0.428014	0.0529138
BCL2L1	0.387925	5.44656e-08	0.593633	0.0356204	0.385804	2.13188e-09
BCL2L10	1.67113	1	-1.02992	1	-2.4303	1
BCL2L11	0.109128	0.560361	-0.967794	0.00478898	-0.291477	0.0239355
BCL2L12	-0.633653	6.03038e-11	0.758573	0.113399	0.509439	2.03271e-07
BCL2L13	0.487203	3.03732e-12	-0.187334	0.555021	0.0050562	0.966509
BCL2L14	-3.45261	1	1.69627	1	1.72402	1
BCL2L15	-2.37066	5.73532e-09	0.6814	0.501554	0.101941	0.922451
BCL2L2	0.457757	4.76841e-06	-0.120204	0.713931	0.177974	0.0413021
BCL2L2-PABPN1	-1.19691	8.45187e-09	-0.189485	0.90027	0.862913	6.02652e-05
BCL3	-0.453052	0.000597632	0.255454	0.551817	-0.433979	0.000178536
BCL6	-0.199776	0.306589	-0.737974	0.0903318	-0.376052	0.0802474
BCL6B	0.225837	1	1.41454	1	0.836295	1
BCL7A	0.0543755	0.620854	-0.0269216	0.943264	0.00516472	0.974336
BCL7B	0.184428	0.0270032	0.461668	0.205098	0.338907	4.43637e-05
BCL7C	-0.413905	4.14393e-05	0.717352	0.177842	0.341017	0.000386872
BCL9	-0.262871	0.0268373	-0.69813	0.225889	-0.206057	0.201215
BCL9L	-0.472299	1.6166e-07	-0.334241	0.58472	0.19046	0.072074
BCLAF1	-0.0683584	0.52813	0.120112	0.812319	0.241681	0.00306707
BCLAF3	0.396461	0.00813532	-0.290799	0.538773	-0.137429	0.439915
BCO1	-2.09985	1.11791e-23	0.0233069	0.975576	-0.720381	0.0671223
BCO2	-1.52001	0.013572	-0.214742	0.897881	-1.79916	1
BCOR	-0.465277	1.45377e-09	-0.0820099	0.911975	-0.0662562	0.56802
BCORL1	-0.363216	0.00194351	-0.521221	0.23863	-0.475405	0.0051819
BCR	-0.438862	5.38295e-08	0.226729	0.427068	0.106304	0.338624
BCS1L	-0.51969	4.53593e-08	0.772989	0.0651074	0.513312	9.13461e-05
BDH1	-0.362782	0.0884973	0.0744833	0.890997	-0.642742	0.0158918
BDH2	-0.593046	0.000238116	-0.34349	0.474918	-1.37008	1.11151e-09
MAP6	0.615369	0.00179356	-0.550558	0.133796	-1.02554	2.00946e-07
RARB	0.649517	9.28988e-09	-1.06277	0.000817307	-1.29175	1.07216e-25
BDNF	0.00115114	0.994332	0.171545	0.63147	-0.0344485	0.841348
BDP1	-0.233453	0.00588605	-0.529054	0.418469	-0.170488	0.109968
BEAN1	0.160485	0.568511	1.12826	0.000130463	-0.945804	0.000339541
BECN1	0.494012	3.23974e-10	0.0796022	0.807807	0.0609073	0.492883
BEGAIN	0.201886	0.397611	0.507868	0.252881	-0.861293	0.000600252
BEND3	-0.516801	0.000135014	-0.0271578	0.963615	0.0467741	0.843747
BEND4	2.75938	1	-2.90704	1	-1.98249	1
BEND5	-1.65061	1	1.15521	1	0.949785	1
BEND6	-0.0522327	0.882052	-1.16443	0.0441367	-1.04739	0.00141676
NGF	2.17554	2.48563e-13	-0.166234	0.814235	-1.02233	0.000282704
BEST1	0.861251	5.95043e-11	0.368812	0.569354	0.194415	0.159947
BEST2	0.518735	1	0.138816	1	-0.346745	1
BEST3	0.152279	0.783994	0.97562	0.196998	-0.130777	0.84831
BEST4	0.146098	0.925301	1.54352	0.258633	0.910426	1
BET1	0.971095	2.69155e-16	0.067674	0.861185	0.609813	8.17232e-08
BET1L	0.324823	3.40567e-05	0.445183	0.0848981	0.49136	1.79368e-11
FRY	3.41269	1.38639e-22	-3.07144	3.59325e-06	-1.26069	7.46004e-05
BEX3	-0.251197	0.00676863	0.577476	0.181707	0.241387	0.0141238
BEX4	4.1475	1.43726e-88	-1.31078	7.57512e-05	-0.0407381	0.812581
BFAR	0.377154	2.80038e-07	0.157642	0.592088	0.207333	0.0139154
BFSP1	0.179684	0.270827	0.0599871	0.882918	-0.370573	0.026577
BGLAP	0.299573	0.871002	0.32787	0.925356	-1.18697	1
BGN	0.738983	1	0.293186	1	-2.5867	1
BHLHA15	4.87548	1.69213e-32	-0.0549803	0.938589	1.24366	1.13569e-11
BHLHB9	-0.208945	0.217758	-0.554094	0.170132	0.246569	0.13133
BHLHE40	0.454356	6.05687e-13	0.0500858	0.901646	-0.0651251	0.431902
BHLHE41	0.253761	0.592544	-1.23232	0.11638	0.038116	0.952756
BHMG1	-2.22978	1	2.42839	1	0.449326	1
BHMT	2.17644	1	-2.38401	1	-2.22048	1
BICC1	-0.503771	7.43709e-05	0.383402	0.4018	-0.449471	3.05679e-05
BICD1	0.327973	0.000873485	-0.242001	0.601898	0.160063	0.123029
BICD2	-0.715333	2.18471e-17	-0.039223	0.943893	0.00409314	0.975845
BICDL1	-0.261159	0.131983	-0.281171	0.530026	-0.859773	6.31343e-06
BICDL2	2.32244	0.197782	-1.18414	1	-0.411176	1
BICRA	0.036945	0.775278	-0.262955	0.42179	-0.101731	0.43765
BICRAL	0.700406	3.70225e-08	-0.601816	0.267793	-0.0468316	0.794922
BID	-0.298913	0.000683831	0.118604	0.803421	-0.244631	0.00828844
BIK	0.903527	0.0169324	0.309398	0.749602	0.00946533	0.986681
BIN1	-0.5929	1.27312e-14	-0.0451363	0.933581	-0.332148	0.000233124
BIN2	0.0972252	0.928439	0.169998	0.91398	-2.35484	1
BIN3	-0.0983181	0.419738	0.346871	0.458785	0.0227365	0.888482
BIRC2	0.198321	0.0486859	-0.0979157	0.823525	0.282454	0.00949817
BIRC3	0.00476386	0.981219	-0.31393	0.518534	0.335077	0.00079343
BIRC5	-1.51783	1.49181e-43	0.864642	0.008143	0.175302	0.119096
BIRC6	-0.0191439	0.85447	-0.733754	0.259337	-0.156059	0.139426
BIRC7	0.0236097	0.945859	0.448089	0.473283	-0.943428	0.000650346
BIVM	-0.372712	0.00426824	-0.340704	0.310149	-0.0169407	0.933362
BIVM-ERCC5	0.306344	0.956593	-3.89359	1	-4.12288	1
BLACAT1	-0.405084	0.815167	-1.82379	1	0.0122253	1
BLCAP	-0.176062	0.0416311	0.267272	0.349456	0.322753	0.000163294
BLID	-0.953869	1		1	2.53954	1
BLK	-0.0952246	1	-0.287184	1	-1.09582	1
BLM	-1.38966	1.56122e-31	0.15826	0.732493	0.116211	0.510853
BLMH	-0.335591	0.000922232	0.0384341	0.922143	-0.16168	0.145385
BLNK	0.0757811	1	0.0825931	1	1.55871	1
BLOC1S1	-0.274386	0.0195315	0.559345	0.30858	-0.171262	0.187033
BLOC1S2	0.0642536	0.618384	0.208403	0.548341	0.150524	0.198923
BLOC1S3	0.289298	0.00243603	-0.0836417	0.820229	-0.0898886	0.486229
BLOC1S4	0.0574282	0.727707	0.492513	0.160388	0.333489	0.00519412
BLOC1S5	0.0512364	0.782932	0.153968	0.701793	0.312272	0.0411913
BLOC1S5-TXNDC5		1	1.92647	1	3.47704	1
BLOC1S6	0.364626	0.000192901	-0.139512	0.763867	0.356924	0.000141515
BLVRA	-0.1805	0.0568173	0.267137	0.551991	-0.128825	0.230058
BLVRB	0.29899	2.83065e-05	0.222691	0.68405	-0.0569997	0.477403
BLZF1	0.489415	8.71175e-08	-0.0533295	0.889481	0.174889	0.114196
BMERB1	0.164325	0.113692	-0.371165	0.203545	-0.240588	0.0212173
BDKRB2	0.355071	0.00198366	-1.59479	8.41626e-06	-1.23778	3.41335e-12
BMI1	0.320186	0.00465646	0.112381	0.780816	0.455658	1.27321e-05
BMP1	-0.12013	0.278456	-0.0207356	0.959182	-0.979469	6.35166e-23
BMP2	-0.0346539	0.969162	-0.222942	0.863669	0.372754	0.622295
BMP2K	0.269721	0.0625053	0.376434	0.294162	0.315577	0.0279632
BMP4	-1.15659	2.02705e-09	-0.709573	0.06542	-0.946303	3.89801e-06
BMP5	-2.37954	0.21155	-1.42197	1	-2.15887	1
BMP6	1.03989	2.14249e-07	-0.986853	0.00862854	0.389644	0.0283713
BMP7	-0.524884	0.377431	0.38953	0.693445	-0.43082	0.596533
BMP8A	0.216571	0.4149	-0.796956	0.0678324	-0.0163905	0.962722
BMP8B	-1.34519	1.51292e-22	-0.0621405	0.897881	-0.277237	0.232331
BMPER	0.10189	0.6575	0.920908	0.00477918	0.654747	0.00397543
BMPR1A	-0.124946	0.221473	-0.451055	0.244426	-0.307554	0.00102444
BMPR1B	0.0441994	0.765242	-0.396125	0.248035	-0.45178	0.000565243
BMPR2	-0.480522	1.93965e-11	-0.475216	0.374533	-0.822017	1.43486e-14
BMS1	-0.275315	3.93759e-05	0.238607	0.437511	0.248613	0.000775455
BMT2	0.225169	0.0707808	-0.397472	0.334307	-0.127207	0.402528
BMX	-1.28146	1	1.15521	1		1
BNC1	3.24972	1.43384e-14	0.715318	0.191709	0.703135	0.00287206
BNC2	-0.336506	0.0309982	-0.045064	0.938872	-0.362832	0.0455363
BNIP1	0.322251	0.0153762	0.697902	0.0986376	0.35788	0.0172763
BNIP2	0.329821	4.28449e-07	-0.30727	0.2935	0.065378	0.460915
BNIP3	0.127377	0.170177	0.173154	0.610209	0.184618	0.0498901
BNIP3L	1.41313	4.33938e-76	-0.332133	0.255941	-0.101356	0.280292
BNIPL	-0.14585	0.918894	-0.212725	1	-0.458971	1
BOC	0.0176336	0.928805	-0.469702	0.213555	-0.833341	2.70801e-06
BOD1	0.602079	2.09813e-13	0.575388	0.0946576	0.488025	7.67454e-08
BOD1L1	-0.137983	0.122197	-0.493835	0.449015	-0.0691244	0.619111
BOK	-0.289645	0.0120134	0.699331	0.0476926	-0.115519	0.410119
BOLA1	-0.102621	0.524245	0.747411	0.106516	0.458926	0.00100562
BOLA2	0.199379	0.303302	0.268778	0.539933	-0.0207671	0.936372
BOLA2B	0.11175	0.265627	0.523183	0.313668	0.153642	0.160122
BOLA2-SMG1P6	0.168082	0.0903566	0.205614	0.606428	-0.168038	0.122687
BOLA3	-0.22968	0.035444	0.618805	0.158517	-0.0385762	0.815325
BOLL	-1.03363	1	-0.699009	1	0.982393	1
BOP1	-0.613498	4.42091e-10	1.03256	0.00371788	0.439966	7.43281e-09
BORA	-0.25033	0.150779	0.435315	0.272492	0.0814268	0.723463
BORCS5	0.377324	0.00383646	0.0628071	0.866537	0.201783	0.164561
BORCS6	0.638978	2.2806e-09	0.172639	0.731775	0.0538085	0.712514
BORCS7	0.724477	6.89212e-12	0.138915	0.671157	0.237454	0.0318165
BORCS8	0.11595	0.430765	0.443919	0.252839	0.362039	0.0076504
BORCS8-MEF2B	-0.194401	0.512095	-0.0440624	0.951074	-0.977769	0.00152778
BPGM	0.0459917	0.81769	0.132848	0.730125	0.253201	0.0575097
BPHL	-0.414752	0.000589634	0.0988783	0.829983	-0.712372	3.29972e-06
BPIFA2	0.969684	1	-0.768346	1	-0.917064	1
BPIFB1	-0.499737	0.770285	-0.750059	1	0.198546	1
BPNT1	-0.398083	0.000136768	-0.141538	0.719806	0.0319545	0.843001
BPTF	-0.60682	4.17357e-17	-0.646724	0.230281	-0.115401	0.333067
BRAF	0.532603	1.86544e-07	-0.235047	0.517823	-0.0182673	0.906541
BRAP	0.218981	0.0108092	0.0544501	0.871755	0.168995	0.0843164
BRAT1	-0.584342	2.17248e-12	0.229442	0.617943	0.00857325	0.950926
BRCA1	-1.26241	1.61183e-42	-0.39406	0.307851	0.181729	0.0661016
BRCA2	-1.21686	3.13555e-23	-0.323155	0.603211	0.18845	0.330977
BRCC3	-0.700229	1.32675e-16	-0.0833821	0.863442	-0.102381	0.423157
BRD1	0.187447	0.0399635	-0.011091	0.982268	0.276842	0.00264897
BRD2	0.388672	7.56728e-05	-0.181639	0.574054	0.00548484	0.962805
BRD3	-0.253535	0.0058155	-0.346556	0.441494	-0.147416	0.226683
BRD3OS	-0.0954904	0.369848	0.228104	0.469172	0.0506512	0.704211
BRD4	0.186827	0.0124715	-0.1566	0.652858	0.246015	0.00123188
BRD7	-0.106314	0.307188	0.0790175	0.814555	0.0388576	0.742955
BRD8	-0.0124037	0.913694	-0.0946665	0.784113	0.0414751	0.726181
BRD9	0.243847	0.00664123	0.267593	0.382729	-0.0232959	0.851197
BRF1	-0.535823	1.5201e-10	0.186701	0.631163	-0.0398121	0.739013
BRF2	-0.178484	0.261719	0.159326	0.729294	0.363417	0.0285165
BRI3	0.63614	1.37185e-12	0.303864	0.565889	0.164502	0.0400296
BRICD5	-1.67047	1.50407e-11	-0.376498	0.604732	-0.213625	0.66699
BRINP1	-0.194748	0.893503	0.332776	0.867196	-0.629587	1
BRINP2	0.941906	0.523448	-1.54518	0.484366	-1.09713	1
BRINP3	-2.78258	1	0.225022	1	1.51888	1
BRIP1	-2.01459	1.07403e-60	-0.397725	0.415848	-0.148543	0.499826
BRIX1	-0.277191	0.00759681	0.53897	0.0904944	0.169008	0.126038
BRK1	0.00254802	0.979191	0.245787	0.614805	-0.15981	0.11057
BRMS1	-0.310079	2.5482e-05	0.709747	0.159651	0.186555	0.0317052
BRMS1L	-0.457644	8.57925e-05	-0.193527	0.55817	-0.327192	0.0158889
NME1-NME2	0.838969	4.55343e-06	0.175824	0.697429	-1.0184	4.81327e-09
BRPF1	-0.130776	0.229317	0.0136371	0.974681	0.0814718	0.488546
BRPF3	0.271288	0.00394334	-0.391386	0.412194	0.0439585	0.738934
BRSK1	0.499049	0.0120626	-0.432032	0.386189	0.101636	0.683052
BRSK2	-0.779335	1.11345e-08	0.454308	0.220718	-0.321322	0.0500011
BRWD1	0.30849	0.000725462	-0.32614	0.45319	-0.044287	0.732878
BRWD3	0.0226784	0.88308	-0.664712	0.250001	-0.565166	8.64367e-05
BSCL2	0.22232	0.0171697	0.542862	0.329977	0.0694227	0.590606
BSDC1	0.118357	0.236567	-0.26072	0.379239	0.118433	0.236126
BSG	-0.102733	0.14658	0.33268	0.419901	-0.0665058	0.401995
BSN	0.00948621	0.983888	-0.215276	0.80783	-0.20283	0.687845
BSPRY	0.627271	0.648299	-0.394784	0.839928	-0.227708	1
BST1	-0.0700268	0.572986	-0.0736079	0.860502	-0.761644	4.49497e-09
BST2	-1.23346	0.364188	-1.25513	1	-0.245408	1
BTAF1	-0.0910059	0.459657	-0.446242	0.46796	-0.0791808	0.488233
BTBD1	-0.198529	0.00562164	-0.081567	0.857933	-0.035166	0.731158
BTBD10	0.318913	0.0002721	0.0648369	0.868844	0.213847	0.0189142
BTBD11	-0.292425	0.0105136	-0.168224	0.699144	-0.911472	4.79788e-15
BTBD16	-1.21214	0.129293	-0.573541	0.757141	-0.777821	1
BTBD17	0.864579	1	0.513382	1	-0.122895	1
BTBD18	-1.85744	1	1.65243	1	2.18161	1
STEAP3	0.91161	1.09297e-21	-0.149476	0.633008	-1.0122	2.32213e-25
BTBD2	-0.333636	1.51249e-06	0.397608	0.322584	0.0109742	0.92557
BTBD3	-0.060452	0.548554	-0.282245	0.529885	0.0727239	0.500915
BTBD6	-0.456107	2.7856e-05	0.419614	0.334726	0.16696	0.181229
BTBD7	-0.0910709	0.321338	-0.318405	0.527075	-0.0402984	0.759028
BTBD8	0.36123	0.2015	-1.5489	0.0459172	-0.73442	0.0127496
BTBD9	0.127694	0.34754	-0.295806	0.518145	0.00488733	0.981869
BTC	1.46167	1.49289e-15	-0.118762	0.776578	-0.0559071	0.801075
BTD	-0.0958079	0.411593	-0.339502	0.259337	-0.197613	0.16081
BTF3	0.38159	8.07704e-06	0.50267	0.212906	0.265381	0.00461569
BTF3L4	0.46927	5.45903e-05	-0.114712	0.751423	0.0606695	0.689658
BTG1	1.28704	1.41937e-60	-0.244098	0.464458	0.245509	0.00888684
BTG2	0.299201	0.0963713	0.0401783	0.932064	-0.491539	0.00184657
BTG3	0.177035	0.176602	0.237	0.470375	-0.0963551	0.469358
BTG4	0.995671	0.493769	0.3966	0.836251	-0.601024	1
BTK	0.208058	0.916062	-0.0176918	1	-0.0212259	1
BTLA	1.59803	1	0.170588	1	1.15992	1
BTN1A1	-0.118491	1	1.52687	1	-1.77226	1
BTN2A1	0.579958	2.55844e-11	-0.208753	0.490398	0.0456817	0.722463
BTN2A2	0.532731	0.000880917	-0.152877	0.67071	0.219234	0.0962704
BTN3A1	0.646827	5.55841e-05	-0.181761	0.664196	0.588448	6.1196e-05
BTN3A2	0.160948	0.353226	0.134658	0.719297	0.177592	0.310852
BTN3A3	0.419316	0.219677	0.0349913	0.962394	0.756677	0.00586839
BTNL9	0.19995	0.595812	-0.306411	0.626229	0.00981678	0.985028
BTRC	-0.34925	0.000904795	-0.386168	0.222263	-0.1111	0.373732
BUB1	-1.19363	2.25705e-21	0.27921	0.555269	0.16776	0.128779
BUB1B	-1.45138	1.31378e-25	0.145065	0.787163	0.294277	0.0061275
BUB3	-0.218876	0.0032792	0.170267	0.543452	0.242207	0.00230125
BUD13	-0.534235	2.92169e-05	0.440572	0.155853	0.204078	0.214349
BUD23	0.302674	2.97102e-06	0.43779	0.279648	0.0592607	0.486978
BUD31	0.459121	1.4015e-07	0.307025	0.554936	0.0497485	0.66177
BVES	0.00655101	0.973603	0.130338	0.758558	0.0511873	0.805503
BX255925.3	-0.68228	1.08472e-09	0.597692	0.251569	0.214627	0.108964
BX276092.9		1		1		1
BX470111.1	-1.69727	0.00113163	2.38664	0.008143	0.656438	0.41635
BYSL	-0.268073	0.0147617	0.574111	0.117101	0.350169	7.08017e-05
BZW1	0.111555	0.203589	0.146888	0.664196	0.473655	2.6396e-08
BZW2	-0.07717	0.523854	0.64832	0.0449129	0.648234	2.01563e-10
C10orf105	-0.270551	1	-0.768346	1	-0.0434698	1
C10orf143	1.05432	0.15643	0.656168	0.44622	0.0767525	0.934837
C10orf55	0.5579	0.176792	-0.376655	0.585302	0.0623947	0.89179
C10orf62	-0.189191	0.935905	0.166388	1	-0.587833	1
C10orf67	-2.03315	1	1.04266	1	0.616622	1
C10orf82	-0.347735	0.815186	-0.117558	1	-0.209408	1
C10orf88	0.268322	0.0251637	0.00537965	0.989165	0.306588	0.0119975
C10orf90	-0.488572	0.586261	0.164547	0.93008	-0.485498	1
C10orf95	0.481414	0.458015	-0.34372	0.735592	-0.540182	0.478909
C11orf1	0.636942	1.71918e-05	0.53927	0.249827	0.137909	0.464229
C11orf16	-0.0583269	1	-0.662586	1	-1.74324	1
C11orf24	-0.627902	1.80704e-12	0.483422	0.206592	0.495197	2.03816e-07
C11orf42	-2.46799	1	0.184604	1	1.43942	1
C11orf45	0.446199	0.00827606	-0.0547998	0.91037	-0.181247	0.421508
C11orf49	0.0628042	0.546302	0.289117	0.437014	-0.700583	1.84257e-09
C11orf52	-0.121054	0.957888	-3.21248	1	-3.35999	1
C11orf54	0.0093533	0.954353	-0.241182	0.455697	0.416881	0.000694943
C11orf58	0.0953977	0.364438	0.352235	0.215598	0.260653	0.00526999
C11orf65	-0.215983	0.864607	0.349042	0.837709	0.135854	1
C11orf68	0.588592	8.46317e-16	0.742189	0.0330177	0.750014	3.7095e-25
C11orf71	0.266643	0.398244	0.136455	0.783451	0.217742	0.394573
C11orf74	0.209361	0.240852	0.328146	0.521858	0.0901225	0.697868
C11orf80	-0.260717	0.127322	0.39044	0.377319	-0.0817593	0.708019
C11orf86	-1.61352	3.55972e-16	0.361162	0.594007	-0.667729	0.0570204
C11orf87	2.01708	0.101889	-0.384788	0.818217	-0.724916	1
C11orf91	0.315674	0.751958	0.397179	0.775522	0.515724	0.572897
C11orf94	-0.953931	1	1.11218	1	1.41075	1
C11orf95	-0.452396	0.00299817	-0.282321	0.480366	-0.106761	0.544446
C11orf96	5.55275	1.16935e-12	-1.1494	0.0758351	0.141768	0.761886
C11orf98	-0.240221	0.00727651	1.0034	0.0198898	0.368428	4.47497e-05
C12orf10	0.473764	1.63905e-12	0.571092	0.198576	0.493991	3.64184e-12
C12orf29	-0.2951	0.0139283	0.150691	0.680272	0.0990425	0.514147
C12orf4	0.199825	0.10226	0.106919	0.749602	0.222185	0.0516461
C12orf42	-1.66906	1		1	1.00649	1
C12orf43	-0.0906945	0.36997	0.364713	0.27517	0.183031	0.0853919
C12orf45	-0.248948	0.127322	0.454909	0.208566	0.0321717	0.874281
C12orf49	0.158094	0.130961	-0.409575	0.191449	-0.267836	0.0024829
C12orf50	-1.06198	1	-0.0238639	1	-0.344248	1
C12orf56	0.733719	0.587858	-0.243288	0.915746	-0.324279	1
C12orf57	0.568332	4.25209e-12	0.530285	0.333473	0.298959	0.00117362
C12orf60	-0.61575	0.0920096	0.402933	0.501554	0.0763383	0.89727
C12orf65	0.146153	0.271855	0.229345	0.528515	0.172405	0.171418
C12orf66	0.0784946	0.675507	-0.0373821	0.931465	0.262682	0.0498461
C12orf73	-0.239978	0.082965	0.492609	0.23142	0.437025	0.00441293
C12orf75	-0.238608	0.000262665	0.378351	0.223641	-0.400902	1.68311e-08
C12orf76	0.676376	1.37843e-05	-0.0422306	0.925084	0.102233	0.57514
C13orf46	-0.535881	0.584848	-2.90883	1	-0.722884	1
C14orf119	-0.259588	0.00592558	0.281704	0.477845	0.228749	0.0489876
C14orf132	-0.11587	0.450098	-0.686706	0.0632353	-0.361465	0.0269453
C14orf178	1.76835	1	-1.56303	1	-0.709742	1
C14orf28	1.44874	7.76525e-18	0.241605	0.519344	0.570107	0.000413912
C14orf93	0.758845	8.55658e-07	0.201469	0.645439	0.172667	0.303642
C15orf39	-0.226634	0.0240445	-0.253477	0.3954	-0.22066	0.0409423
C15orf40	-0.177551	0.105711	0.332229	0.358483	0.128183	0.331762
C15orf41	-0.192617	0.166674	-0.258109	0.490202	-0.39893	0.00566466
C15orf48	0.488801	5.14957e-05	0.52411	0.333057	0.0424374	0.862695
C15orf61	0.166527	0.259483	0.282877	0.566725	0.221719	0.140608
C15orf62	-0.275927	0.562475	-0.471153	0.545099	-0.28614	0.606177
C15orf65	0.851752	0.00465278	-0.770688	0.145281	-0.224916	0.51657
[truncated: 14,835 more rows]
