# Supplementary material for: ATF4 and ATF6 produce diverse transcriptional signatures affecting metabolic genes and cell death under glucose deprivation
Source: Research Square preprint supplement (doi:10.21203/rs.3.rs-7829324/v1), 2025-11-03
Supplement: Supplementary file 3 [file e51a8d636aa74619df2032a7.docx]

Supplementary table 1.

| **REAGENT or RESOURCE** | **SOURCE** | **IDENTIFIER** |
| --- | --- | --- |
| **Antibodies** | | |
| Goat Anti-Mouse IgG–Peroxidase | Sigma-Aldrich | A9917 |
| Goat Anti-Rabbit IgG–Peroxidase | Sigma-Aldrich | A0545 |
| Mouse monoclonal anti-Actin, (C4) | Merck Millipore | MAB1501R |
| Mouse monoclonal anti-CHOP (L63F7) | Cell Signaling | #2895S |
| Rabbit monoclonal anti-ATF-4 (D4B8) | Cell Signaling | #11815S |
| Rabbit monoclonal anti-PERK (C33E10) | Cell Signaling | #3192S |
| Mouse monoclonal anti-ATF-6 antibody (3B7E4) | Proteintech | #66563-1 |
| Rabbit monoclonal anti-TRAIL-R1(or DR4) (D9S1R) | Cell Signaling | #42533 |
| Rabbit monoclonal anti-TRAIL-R2 (or DR5) (D4E9) | Cell Signaling | #8074S |
| Mouse monoclonal anti-Noxa (114C307.1) | Calbiochem | OP180 |
| **Chemicals** | | |
| D-(+)-Glucose | Sigma-Aldrich | G7021 |
| DharmaFECT1 | ThermoFisher Scientific | T-2001-02 |
| DMEM, high glucose, no glutamine | Gibco (ThermoFisher Scientific) | 11960044 |
| Dulbecco's Modified Eagle Medium (DMEM)- glucose free | Gibco (ThermoFisher Scientific) | 11966-025 |
| L-Glutamine (200 mM) | Gibco (ThermoFisher Scientific) | 25030024 |
| Methanol | Millipore | 106009 |
| MKC8866 | Gifted by E. Chevet | N/A |
| Ponceau S Staining Solution | ThermoFisher Scientific | A40000279 |
| PowerUp SYBR Green Master mix | Applied biosystems | A25741 |
| RPMI 1640 | Gibco (ThermoFisher Scientific) | 21875034 |
| RPMI 1640 – glucose free | Gibco (ThermoFisher Scientific) | 11879020 |
| **Experimental models: Cell lines** | | |
| A549 | ATCC | ATCC CCL-185 |
| H1299 | Gifted by Montserrat Sanchez Cespedes | ATCC CRL-5803 |
| H460 | Gifted by Vanessa Soto Cerrato | ATCC HTB-177 |
| SW900 | ATCC | ATCC HTB-59 |
| **siRNA oligonucleotides** | | |
| **Gene** | **Sequence (5’à3’)** | **Source** |
| ATF4 | GCCUAGGUCUCUUAGAUGA | Sigma-Aldrich |
| ATF6 | GAACAGGAUUCCAGGAGAAUU | Sigma-Aldrich |
| CHOP | GGUCCUGUCCUCAGAUGAA | Sigma-Aldrich |
| XBP1 | CACCCUGAAUUCAUUGUCU | Sigma-Aldrich |
| DR4 | CACCAAUGCUUCCAACAAU | Sigma-Aldrich |
| DR5 | GCUGUGGAGGAGACGGUGAUU | Sigma-Aldrich |
| NOXA | GCTACTCAACTCAGGAGATTT | Sigma-Aldrich |
| **qPCR primers** | | |
| **Gene** | **Forward (5’à 3’)** | **Reverse (5’à 3’)** |
| AGR2 | GGTGACCAACTCATCTGGACTC | TGACTGTGTGGGCACTCATCCA |
| ATF4 | ACGGCAGCTCGCCATCATCG | ACCCAACAGGGCATCCAAGT |
| ATF6 | CTCCGAGATCAGCAGAGGAA | AATGACTCAGGAATGGTGCT |
| CHOP | AAGGCACTGAGCGTATCATGT | TGAAGATACACTTCCTTCTTGAACA |
| HSPA5 (GRP78/BiP) | TGTTCAACCAATTATCAGCAAACTC | TTCTGCTGTATCCTCTTCACCAGT |
| IRE1 | GCCGAAGTTCAGATGGAATC | ATCTGCAAAGGCCGATGA |
| L32 | AACGTCAAGGAGCTGGAAG | GGGTTGGTGACTCTGATGG |
| NOXA | GCTGGAAGTCGAGTGTGCTA | CCTGAGCAGAAGAGTTTGGA |
| PERK | ATGATCATTCCTTCCCTGGAT | AGTCAGAGATTTTCCTCCAACC |
| TNFRSFR10A (or DR4) | GCTGTGCTGATTGTCTGTTG | TCGTTGTGAGCATTGTCCTC |
| TNFRSF10B (or DR5) | TGAGACCTTTCAGCTTCTGC | ATCGTGAGTATCTTGCAGCC |
| XBP1 | CCTGGTTCTCAACTACAAGGC | ATGAGCAGCTCAGACTGCGA |
| XBP1s | TTACGAGAGAAAACTCATGGCC | GGGTCCAAGTTGTCCAGAATGC |
|  | | |
