# Supplementary material for: ATF4 and ATF6 produce diverse transcriptional signatures affecting metabolic genes and cell death under glucose deprivation
Source: Research Square preprint supplement (doi:10.21203/rs.3.rs-7829324/v1), 2025-11-03
Supplement: Supplementary file 4 [file ea670eba52f283ec2193cc71.xlsx]

## Sheet: 6h
pathway	level1	level2	name	NES_0_glc	padj_0_glc	size	NES_atf4_0_glc	padj_atf4_0_glc	size	NES_atf6_0_glc	padj_atf6_0_glc	size
REACTOME_CELL_CELL_COMMUNICATION	Cell Communication	Cell Cell communication	Cell-Cell communication							-2.00072	1.36959e-05	118
REACTOME_GAP_JUNCTION_ASSEMBLY	Cell Communication	Cell junction organization	Gap junction assembly	-1.97035	0.00404938	31
REACTOME_NON_INTEGRIN_MEMBRANE_ECM_INTERACTIONS	Cell Communication	Cell-extracellular matrix interactions	Non-integrin membrane ECM interactions				-1.71645	0.0241314	57	-2.23666	3.6194e-06	57
REACTOME_INTEGRIN_CELL_SURFACE_INTERACTIONS	Cell Communication	Cell surface interactions	Integrin cell surface interactions				-1.66292	0.0175124	81	-2.02912	2.63158e-05	81
REACTOME_L1CAM_INTERACTIONS	Cell Communication	Cell-cell signaling	L1CAM interactions							-2.07036	2.96868e-06	112
REACTOME_SEMAPHORIN_INTERACTIONS	Cell Communication	Cell-cell signaling	Semaphorin interactions							-1.97237	0.000568028	59
REACTOME_ADHERENS_JUNCTIONS_INTERACTIONS	Cell Communication	Cell junction organization	Adherens junctions interactions							-1.85483	0.00664231	31
REACTOME_CELL_CELL_JUNCTION_ORGANIZATION	Cell Communication	Cell junction organization	Cell-cell junction organization							-1.74903	0.00587989	58
REACTOME_CELL_JUNCTION_ORGANIZATION	Cell Communication	Cell junction organization	Cell junction organization							-1.73061	0.00422503	85
REACTOME_NEUREXINS_AND_NEUROLIGINS	Cell Communication	Synapse organization and signaling	Neurexins and Neuroligins							-1.57692	0.0393983	49
REACTOME_MITOTIC_G2_G2_M_PHASES	Cell Cycle and DNA Repair	Mitosis	Mitotic G2/G2-M phases	-1.40288	0.0346976	196	1.70037	0.00108522	194	1.41351	0.00853404	195
REACTOME_MITOTIC_PROMETAPHASE	Cell Cycle and DNA Repair	M Phase	Mitotic Prometaphase	-1.52463	0.011058	200	1.90259	2.9037e-05	198	1.45928	0.00816065	199
REACTOME_MITOTIC_METAPHASE_AND_ANAPHASE	Cell Cycle and DNA Repair	M Phase	Mitotic Metaphase and Anaphase	-1.48068	0.00813473	232	1.76211	0.000148271	230	1.4614	0.00322595	231
REACTOME_TP53_REGULATES_TRANSCRIPTION_OF_CELL_CYCLE_GENES	Gene Expression	Regulation of gene expression	TP53 regulates transcription of cell cycle genes	-1.77932	0.0129387	49	2.28238	2.79054e-05	49	1.78252	0.004334	49
REACTOME_TELOMERE_MAINTENANCE	Cell Cycle and DNA Repair	DNA Repair	Telomere maintenance	-1.44363	0.0430561	100				2.34839	1.84031e-08	101
REACTOME_DISEASES_OF_MITOTIC_CELL_CYCLE	Disease	Genetic Disease	Diseases of mitotic cell cycle	-1.75417	0.017756	38	2.02555	0.00197205	38	1.78598	0.0123541	38
REACTOME_M_PHASE	Cell Cycle and DNA Repair	M Phase	M Phase	-1.35033	0.0217172	399	1.63464	8.40501e-05	396	1.8632	1.08224e-08	399
REACTOME_CHROMOSOME_MAINTENANCE	Cell Cycle and DNA Repair	Chromosome maintenance	Chromosome maintenance	-1.49353	0.0216883	127				2.23105	8.88139e-08	128
REACTOME_SUMOYLATION_OF_DNA_REPLICATION_PROTEINS	Post-translational protein modification	SUMOylation	Sumoylation of DNA replication proteins	-1.69785	0.0216883	46	1.99314	0.00196826	46	1.98626	0.000857199	46
REACTOME_CELLULAR_SENESCENCE	Cell Cycle and DNA Repair	Cellular Senescence	Cellular Senescence	-1.46206	0.0214435	177	1.42367	0.0357859	176	2.01619	4.0182e-07	178
REACTOME_SWITCHING_OF_ORIGINS_TO_A_POST_REPLICATIVE_STATE	Cell Cycle and DNA Repair	DNA Replication	Switching of origins to a post replicative state	-1.69784	0.0107588	90	1.84466	0.00181113	90	2.02672	7.05154e-05	90
REACTOME_ORC1_REMOVAL_FROM_CHROMATIN	Cell Cycle and DNA Repair	DNA Replication	ORC1 removal from chromatin	-1.57781	0.0304191	69	1.80734	0.00625661	69	2.06763	4.28712e-05	69
REACTOME_MITOTIC_G1_PHASE_AND_G1_S_TRANSITION	Cell Cycle and DNA Repair	Cell cycle regulation	Mitotic G1 phase and G1/S transition	-1.78693	0.00033203	147	2.44261	7.52506e-10	147	2.0936	2.79479e-07	147
REACTOME_CELL_CYCLE_CHECKPOINTS	Cell Cycle and DNA Repair	Cell Cycle Checkpoints	Cell Cycle Checkpoints	-1.64324	0.000365762	276	2.00738	9.94018e-08	276	2.15611	3.1092e-11	277
REACTOME_ACTIVATION_OF_ATR_IN_RESPONSE_TO_REPLICATION_STRESS	Cell Cycle and DNA Repair	Cell cycle checkpoints	Activation of ATR in response to replication stress	-1.63615	0.0379533	37	2.23567	0.000137314	37	2.2073	7.80129e-05	37
REACTOME_S_PHASE	Cell Cycle and DNA Repair	DNA Replication	S phase	-1.66426	0.0027902	161	2.37726	1.10624e-09	161	2.23268	6.79607e-09	161
REACTOME_DNA_REPLICATION_PRE_INITIATION	Cell Cycle and DNA Repair	DNA Replication	DNA replication pre initiation	-1.4355	0.0430225	148	1.47687	0.0257256	147	2.29051	9.17453e-10	149
REACTOME_SYNTHESIS_OF_DNA	Cell Cycle and DNA Repair	DNA Replication	DNA strand elongation	-1.87233	0.000291503	119	2.18852	2.04968e-06	119	2.328	5.44814e-09	119
REACTOME_ACTIVATION_OF_THE_PRE_REPLICATIVE_COMPLEX	Cell Cycle and DNA Repair	DNA Replication	Activation of the pre replicative complex	-1.95129	0.00174099	33	2.32485	5.01748e-05	33	2.34963	4.65269e-06	33
REACTOME_G2_M_CHECKPOINTS	Cell Cycle and DNA Repair	Cell Cycle Checkpoints	G2/M Checkpoints	-1.63463	0.00279913	154	1.97073	2.9037e-05	154	2.35859	1.35156e-10	155
REACTOME_DNA_REPLICATION	Cell Cycle and DNA Repair	DNA Replication	DNA Replication	-1.77414	0.000291177	174	1.68487	0.0018684	173	2.38568	3.95149e-12	175
REACTOME_NUCLEAR_ENVELOPE_BREAKDOWN	Cell Cycle and DNA Repair	M Phase	Nuclear Envelope Breakdown	-1.69667	0.0146541	53	1.92698	0.00236405	53	2.38723	3.11696e-07	53
REACTOME_DNA_STRAND_ELONGATION	Cell Cycle and DNA Repair	DNA Replication	DNA strand elongation	-2.16216	0.000176094	32	2.34192	0.000112687	32	2.52885	1.41025e-07	32
REACTOME_G2_M_DNA_DAMAGE_CHECKPOINT	Cell Cycle and DNA Repair	Cell cycle checkpoints	G2/M DNA damage checkpoint				1.53958	0.030084	83	2.19332	3.6194e-06	84
REACTOME_GLOBAL_GENOME_NUCLEOTIDE_EXCISION_REPAIR_GG_NER	Cell Cycle and DNA Repair	Nucleotide Excision Repair (NER)	Global Genome Nucleotide Excision Repair (GG-NER)				1.58079	0.0235524	84	1.89358	0.000470614	84
REACTOME_PROCESSING_OF_DNA_DOUBLE_STRAND_BREAK_ENDS	Cell Cycle and DNA Repair	DNA Repair	Processing of DNA double strand break ends				1.60998	0.0241314	86	2.2575	5.20583e-07	87
REACTOME_DNA_DOUBLE_STRAND_BREAK_REPAIR	Cell Cycle and DNA Repair	Double Strand Break Repair	DNA Double Strand Break Repair				1.61621	0.00626074	156	2.139	3.03168e-08	157
REACTOME_DNA_REPAIR	Cell Cycle and DNA Repair	DNA Repair	DNA Repair				1.62061	0.000239288	317	2.20164	5.48346e-13	319
REACTOME_APC_C_MEDIATED_DEGRADATION_OF_CELL_CYCLE_PROTEINS	Cell Cycle and DNA Repair	M Phase	APC/C-mediated degradation of cell cycle proteins				1.64959	0.0162853	86	1.8963	0.000847188	86
REACTOME_RECRUITMENT_OF_NUMA_TO_MITOTIC_CENTROSOMES	Cell Cycle and DNA Repair	Mitosis	Recruitment of NUMA to mitotic centrosomes				1.65024	0.0106725	91
REACTOME_EXTENSION_OF_TELOMERES	Cell Cycle and DNA Repair	DNA Replication	Extension of telomeres				1.66273	0.0246936	51	2.55561	6.4193e-09	51
REACTOME_APC_C_CDH1_MEDIATED_DEGRADATION_OF_CDC20_AND_OTHER_APC_C_CDH1_TARGETED_PROTEINS_IN_LATE_MITOSIS_EARLY_G1	Cell Cycle and DNA Repair	M Phase	APC/C:Cdh1-mediated degradation of Cdc20 and other APC/C:Cdh1 targets				1.66537	0.0228023	72	1.83442	0.00165305	72
REACTOME_MITOTIC_SPINDLE_CHECKPOINT	Cell Cycle and DNA Repair	Cell Cycle Checkpoints	Mitotic Spindle Checkpoint				1.68685	0.00618701	110	1.37789	0.0314625	110
REACTOME_CYCLIN_A_CDK2_ASSOCIATED_EVENTS_AT_S_PHASE_ENTRY	Cell Cycle and DNA Repair	Cell cycle regulation	Cyclin A CDK2 associated events at S phase entry				1.69044	0.00812819	85	1.63898	0.0105255	85
REACTOME_HOMOLOGY_DIRECTED_REPAIR	Cell Cycle and DNA Repair	Double Strand Break Repair	Homology Directed Repair				1.69808	0.0045433	127	2.3841	2.05592e-09	128
REACTOME_HDR_THROUGH_HOMOLOGOUS_RECOMBINATION_HRR	Cell Cycle and DNA Repair	DNA Repair	HDR through Homologous Recombination (HRR)				1.71501	0.0103136	68	2.14793	2.86936e-05	68
REACTOME_RESOLUTION_OF_D_LOOP_STRUCTURES	Cell Cycle and DNA Repair	DNA Repair	Resolution of D loop structures				1.71789	0.0298708	35	2.21294	9.33142e-05	35
REACTOME_RECRUITMENT_OF_MITOTIC_CENTROSOME_PROTEINS_AND_COMPLEXES	Cell Cycle and DNA Repair	Mitosis	Recruitment of mitotic centrosome proteins and complexes				1.74785	0.00465364	80	1.43297	0.0497398	80
REACTOME_REGULATION_OF_PLK1_ACTIVITY_AT_G2_M_TRANSITION	Cell Cycle and DNA Repair	G2/M Checkpoints	Regulation of PLK1 activity at G2/M transition				1.80437	0.00384049	86
REACTOME_TELOMERE_C_STRAND_LAGGING_STRAND_SYNTHESIS	Cell Cycle and DNA Repair	DNA Replication	Telomere C-strand lagging strand synthesis				1.83319	0.0149074	34	2.36899	5.44822e-06	34
REACTOME_HDR_THROUGH_SINGLE_STRAND_ANNEALING_SSA	Cell Cycle and DNA Repair	DNA Repair	HDR through single strand annealing (SSA)				1.91458	0.00454014	37	2.20563	7.93385e-05	37
REACTOME_HOMOLOGOUS_DNA_PAIRING_AND_STRAND_EXCHANGE	Cell Cycle and DNA Repair	DNA Repair	Homologous DNA pairing and strand exchange				1.94022	0.00375327	43	2.0709	0.000316588	43
REACTOME_CYCLIN_D_ASSOCIATED_EVENTS_IN_G1	Cell Cycle and DNA Repair	Cell cycle regulation	Cyclin D associated events in G1				2.04215	0.00118653	45	1.5548	0.0329706	45
REACTOME_NUCLEAR_PORE_COMPLEX_NPC_DISASSEMBLY	Cell Cycle and DNA Repair	M Phase	Nuclear Pore Complex NPC Disassembly				2.07088	0.00128392	36	2.33765	5.44822e-06	36
REACTOME_AURKA_ACTIVATION_BY_TPX2	Cell Cycle and DNA Repair	Mitosis	AURKA activation by TPX2				2.07396	0.000100327	71
REACTOME_SCF_BETA_TRCP_MEDIATED_DEGRADATION_OF_EMI1	Cell Cycle and DNA Repair	Regulation of mitotic cell cycle	SCF(Beta-TRCP) mediated degradation of Emi1							1.49185	0.0457308	53
REACTOME_NONHOMOLOGOUS_END_JOINING_NHEJ	Cell Cycle and DNA Repair	DNA Repair	Nonhomologous end joining (NHEJ)							1.55308	0.0358396	58
REACTOME_INHIBITION_OF_DNA_RECOMBINATION_AT_TELOMERE	Cell Cycle and DNA Repair	DNA repair and telomere maintenance	Inhibition of DNA recombination at telomere							1.59323	0.0214084	56
REACTOME_TERMINATION_OF_TRANSLESION_DNA_SYNTHESIS	Cell Cycle and DNA Repair	DNA damage bypass	Termination of translesion DNA synthesis							1.6269	0.0404485	32
REACTOME_DNA_DAMAGE_BYPASS	Cell Cycle and DNA Repair	DNA damage tolerance	DNA damage bypass							1.63361	0.0211335	48
REACTOME_OXIDATIVE_STRESS_INDUCED_SENESCENCE	Cell Cycle and DNA Repair	Cellular Senescence	Oxidative stress induced senescence							1.65693	0.004334	109
REACTOME_SCF_SKP2_MEDIATED_DEGRADATION_OF_P27_P21	Cell Cycle and DNA Repair	Regulation of mitotic cell cycle	SCF(SKP2) mediated degradation of P27/P21							1.68051	0.00613573	60
REACTOME_G1_S_DNA_DAMAGE_CHECKPOINTS	Cell Cycle and DNA Repair	Cell Cycle Checkpoints	G1/S DNA Damage Checkpoints							1.68993	0.00651384	65
REACTOME_DUAL_INCISION_IN_GG_NER	Cell Cycle and DNA Repair	Nucleotide Excision Repair (NER)	Dual incision in GG-NER							1.70469	0.0130729	41
REACTOME_DEPOSITION_OF_NEW_CENPA_CONTAINING_NUCLEOSOMES_AT_THE_CENTROMERE	Cell Cycle and DNA Repair	Chromosome maintenance	Deposition of new CENPA containing nucleosomes at the centromere							1.74554	0.00222001	62
REACTOME_TRANSCRIPTION_COUPLED_NUCLEOTIDE_EXCISION_REPAIR_TC_NER	Cell Cycle and DNA Repair	Nucleotide Excision Repair (NER)	Transcription-Coupled Nucleotide Excision Repair (TC-NER)							1.74763	0.00360228	78
REACTOME_NUCLEOTIDE_EXCISION_REPAIR	Cell Cycle and DNA Repair	Nucleotide Excision Repair (NER)	Nucleotide excision repair							1.79149	0.00023468	110
REACTOME_SENESCENCE_ASSOCIATED_SECRETORY_PHENOTYPE_SASP	Cell Cycle and DNA Repair	Cellular Senescence	Senescence associated secretory phenotype (SASP)							1.80539	0.00074728	98
REACTOME_MEIOTIC_SYNAPSIS	Cell Cycle and DNA Repair	Meiosis	Meiotic synapsis							1.88118	0.000780352	65
REACTOME_RECOGNITION_OF_DNA_DAMAGE_BY_PCNA_CONTAINING_REPLICATION_COMPLEX	Cell Cycle and DNA Repair	DNA Replication	Recognition of DNA damage by PCNA containing replication complex							1.89642	0.004334	30
REACTOME_DNA_DAMAGE_RECOGNITION_IN_GG_NER	Cell Cycle and DNA Repair	DNA Repair	DNA damage recognition in global genome nucleotide excision repair (GG-NER)							1.9136	0.00374804	38
REACTOME_FANCONI_ANEMIA_PATHWAY	Cell Cycle and DNA Repair	Double Strand Break Repair	Fanconi anemia pathway							1.98463	0.000857199	39
REACTOME_CONDENSATION_OF_PROPHASE_CHROMOSOMES	Cell Cycle and DNA Repair	Mitosis	Condensation of prophase chromosomes							2.00266	6.46105e-05	62
REACTOME_RECOGNITION_AND_ASSOCIATION_OF_DNA_GLYCOSYLASE_WITH_SITE_CONTAINING_AN_AFFECTED_PURINE	Cell Cycle and DNA Repair	DNA Repair	Recognition and association of DNA glycosylase with site containing an affected purine							2.01665	0.000846172	44
REACTOME_ASSEMBLY_OF_THE_ORC_COMPLEX_AT_THE_ORIGIN_OF_REPLICATION	Cell Cycle and DNA Repair	DNA Replication	Assembly of the ORC complex at the origin of replication							2.01692	0.000293585	58
REACTOME_BASE_EXCISION_REPAIR_AP_SITE_FORMATION	Cell Cycle and DNA Repair	DNA Repair	Base excision repair AP site formation							2.03737	0.000156607	51
REACTOME_MEIOTIC_RECOMBINATION	Cell Cycle and DNA Repair	Meiosis	Meiotic recombination							2.14303	7.79509e-06	74
REACTOME_DNA_DAMAGE_TELOMERE_STRESS_INDUCED_SENESCENCE	Cell Cycle and DNA Repair	DNA Damage Response	DNA damage telomere stress-induced senescence							2.27985	8.63409e-07	67
REACTOME_MITOTIC_PROPHASE	Cell Cycle and DNA Repair	Mitosis	Mitotic prophase							2.29673	3.87393e-09	131
REACTOME_RESOLUTION_OF_ABASIC_SITES_AP_SITES	Cell Cycle and DNA Repair	DNA Repair	Resolution of abasic sites (AP sites)							2.29681	1.59875e-05	37
REACTOME_BASE_EXCISION_REPAIR	Cell Cycle and DNA Repair	DNA Repair	Base excision repair							2.44721	2.41489e-08	78
REACTOME_CELLULAR_RESPONSE_TO_STARVATION	Cellular Responses to Stimuli	Cellular response to starvation	Cellular response to starvation	2.40517	7.00053e-11	153	-2.15578	1.46946e-07	153	1.93458	9.55445e-06	153
REACTOME_ONCOGENE_INDUCED_SENESCENCE	Cellular responses to stimuli	Cellular responses to stress	Oncogene induced senescence				1.81931	0.028118	31
REACTOME_RESPONSE_TO_ELEVATED_PLATELET_CYTOSOLIC_CA2	Cellular Responses to Stimuli	Response to elevated platelet cytosolic Ca2+	Response to elevated platelet cytosolic Ca2+							-1.90218	6.66658e-05	123
REACTOME_CIRCADIAN_CLOCK	Cellular Responses to Stimuli	Circadian rhythm	Circadian clock	1.6385	0.0441754	67
REACTOME_IRE1ALPHA_ACTIVATES_CHAPERONES	Cellular Responses to Stress	Cellular response to starvation	IRE1alpha activates chaperones	2.6316	9.29756e-11	50
REACTOME_PERK_REGULATES_GENE_EXPRESSION	Cellular Responses to Stress	Cellular response to starvation	PERK regulates gene expression	2.35565	1.65862e-06	32
REACTOME_AMINO_ACIDS_REGULATE_MTORC1	Cellular responses to stress	Cellular response to starvation	Amino acids regulate mTorc1	1.69793	0.022738	53	-1.73347	0.0193479	53
REACTOME_CELLULAR_RESPONSE_TO_CHEMICAL_STRESS	Cellular Responses to Stress	Cellular response to starvation	Cellular response to chemical stress				-1.53708	0.0156923	189
REACTOME_CELLULAR_RESPONSE_TO_HEAT_STRESS	Cellular Responses to Stress	Heat shock response	Cellular response to heat stress							1.84463	0.000342356	99
REACTOME_REGULATION_OF_HSF1_MEDIATED_HEAT_SHOCK_RESPONSE	Cellular Responses to Stress	Heat shock response	Regulation of HSF1 mediated heat shock response							1.88767	0.000561709	80
REACTOME_HDACS_DEACETYLATE_HISTONES	Chromatin organization	Chromatin modifying enzymes	Hdacs deacetylate histones							1.54486	0.0183234	82
REACTOME_ACTIVATION_OF_ANTERIOR_HOX_GENES_IN_HINDBRAIN_DEVELOPMENT_DURING_EARLY_EMBRYOGENESIS	Developmental Biology	Activation of HOX genes during differentiation	Activation of anterior hox genes in hindbrain development during early embryogenesis							1.53709	0.00648893	110
REACTOME_REGULATION_OF_EXPRESSION_OF_SLITS_AND_ROBOS	Developmental Biology	Axon guidance	Regulation of expression of SLITs and ROBOS	1.67825	0.00479384	167				2.32367	3.22452e-10	167
REACTOME_RUNX1_REGULATES_TRANSCRIPTION_OF_GENES_INVOLVED_IN_DIFFERENTIATION_OF_HSCS	Developmental Biology	Hematopoiesis	RUNX1 regulates transcription of genes involved in differentiation of HSCs							1.63649	0.00276193	116
REACTOME_TRANSCRIPTIONAL_REGULATION_OF_GRANULOPOIESIS	Developmental Biology	Hematopoiesis	Transcriptional regulation of granulopoiesis							1.88037	0.00130144	77
REACTOME_MEIOSIS	Developmental Biology	Cell cycle	Meiosis							2.08061	9.21827e-06	104
REACTOME_DISEASES_OF_SIGNAL_TRANSDUCTION_BY_GROWTH_FACTOR_RECEPTORS_AND_SECOND_MESSENGERS	Disease	Diseases of signal transduction by growth factor receptors and second messengers	Diseases of signal transduction by growth factor receptors and second messengers	1.39076	0.0216883	410
REACTOME_DISEASES_OF_PROGRAMMED_CELL_DEATH	Disease	Diseases of programmed cell death	Diseases of programmed cell death							1.72329	0.00341382	90
REACTOME_SARS_COV_1_MODULATES_HOST_TRANSLATION_MACHINERY	Disease	Viral Infection	SARS-CoV-1 modulates host translation machinery	1.99261	0.00353918	36	-1.93977	0.00364583	36	2.13642	0.000173016	36
REACTOME_SARS_COV_2_MODULATES_HOST_TRANSLATION_MACHINERY	Disease	Viral Infection	SARS-CoV-2 modulates host translation machinery	1.90973	0.00480922	50				2.23959	8.82932e-06	50
REACTOME_DEFECTIVE_CFTR_CAUSES_CYSTIC_FIBROSIS	Disease	Genetic Disease	Defective CFTR causes cystic fibrosis	1.87101	0.00528547	59
REACTOME_INFLUENZA_INFECTION	Disease	Viral Infection	Influenza infection	1.68815	0.00279913	155				2.51616	7.93376e-13	155
REACTOME_ABC_TRANSPORTER_DISORDERS	Disease	Genetic Disease	ABC transporter disorders	1.64348	0.0196079	76
REACTOME_SARS_COV_1_INFECTION	Disease	Viral Infection	SARS-CoV-1 infection	1.49629	0.035134	138				1.42447	0.0337334	138
REACTOME_HCMV_EARLY_EVENTS	Disease	Viral Infection	HCMV early events	-1.43517	0.0458097	124				1.55683	0.00449321	124
REACTOME_SEPARATION_OF_SISTER_CHROMATIDS	Cell Cycle and DNA Repair	M Phase	Separation of Sister Chromatids	-1.42428	0.0336101	187	1.62135	0.00465364	185
REACTOME_DISEASES_OF_DNA_REPAIR	Disease	DNA Repair Defects	Diseases of DNA Repair				1.82239	0.00641555	51	2.12562	4.72857e-05	51
REACTOME_EXPORT_OF_VIRAL_RIBONUCLEOPROTEINS_FROM_NUCLEUS	Disease	Viral Infection	Export of viral ribonucleoproteins from nucleus				1.88889	0.005059	33	2.30916	9.21827e-06	33
REACTOME_INTERACTIONS_OF_VPR_WITH_HOST_CELLULAR_PROTEINS	Disease	Viral Infection	Interactions of Vpr with host cellular proteins				1.94659	0.00364583	37	2.38309	3.23874e-06	37
REACTOME_NS1_MEDIATED_EFFECTS_ON_HOST_PATHWAYS	Disease	Viral Infection	NS1 mediated effects on host pathways				1.95781	0.0030036	41	2.22265	4.06968e-05	41
REACTOME_INTERACTIONS_OF_REV_WITH_HOST_CELLULAR_PROTEINS	Disease	Viral Infection	Interactions of Rev with host cellular proteins				2.04126	0.00176497	37	2.31453	1.15902e-05	37
REACTOME_NUCLEAR_IMPORT_OF_REV_PROTEIN	Disease	Viral Infection	Nuclear import of Rev protein				2.06416	0.00176497	34	2.29725	2.25158e-05	34
REACTOME_DISEASES_ASSOCIATED_WITH_O_GLYCOSYLATION_OF_PROTEINS	Disease	Metabolic Disease	Diseases associated with O-glycosylation of proteins							-1.80939	0.00356616	57
REACTOME_DISEASES_ASSOCIATED_WITH_GLYCOSAMINOGLYCAN_METABOLISM	Disease	Metabolic Disease	Diseases associated with glycosaminoglycan metabolism							-1.77	0.00989303	38
REACTOME_DISEASES_OF_GLYCOSYLATION	Disease	Metabolic Disease	Diseases of glycosylation							-1.49514	0.0240544	129
REACTOME_LEISHMANIA_INFECTION	Disease	Infectious disease	Leishmania infection							-1.43512	0.0373105	145
REACTOME_HCMV_INFECTION	Disease	Viral Infection	HCMV infection							1.49564	0.010904	148
REACTOME_HIV_INFECTION	Disease	Viral Infection	HIV Infection							1.53612	0.00165029	226
REACTOME_HOST_INTERACTIONS_OF_HIV_FACTORS	Disease	Viral Infection	Host interactions of HIV factors							1.5476	0.00664231	127
REACTOME_SARS_COV_1_HOST_INTERACTIONS	Disease	Viral Infection	SARS-CoV-1 host interactions							1.599	0.00845974	93
REACTOME_SARS_COV_2_HOST_INTERACTIONS	Disease	Viral Infection	SARS-CoV-2 host interactions							1.73428	0.000101623	183
REACTOME_HIV_LIFE_CYCLE	Disease	Viral Infection	HIV Life Cycle							1.75196	0.000333605	148
REACTOME_VIRAL_MESSENGER_RNA_SYNTHESIS	Disease	Viral Infection	Viral messenger RNA synthesis							2.08401	0.000420227	44
REACTOME_HCMV_LATE_EVENTS	Disease	Infectious disease	HCMV late events							2.17331	1.44749e-06	104
REACTOME_COLLAGEN_CHAIN_TRIMERIZATION	Extracellular matrix organization	Collagen biosynthesis and modifying enzymes	Collagen chain trimerization				-1.67839	0.03727	40	-2.23847	8.82932e-06	40
REACTOME_EXTRACELLULAR_MATRIX_ORGANIZATION	Extracellular matrix organization	Extracellular matrix organization	Extracellular matrix organization				-1.53977	0.0057675	271	-2.21776	1.72015e-12	272
REACTOME_COLLAGEN_BIOSYNTHESIS_AND_MODIFYING_ENZYMES	Extracellular matrix organization	Collagen biosynthesis and modifying enzymes	Collagen biosynthesis and modifying enzymes							-2.19736	6.14407e-06	63
REACTOME_COLLAGEN_DEGRADATION	Extracellular matrix organization	Collagen biosynthesis and modifying enzymes	Collagen degradation							-2.04547	9.33142e-05	57
REACTOME_DEGRADATION_OF_THE_EXTRACELLULAR_MATRIX	Extracellular matrix organization	Extracellular matrix organization	Degradation of the extracellular matrix							-1.96469	2.70878e-05	122
REACTOME_LAMININ_INTERACTIONS	Extracellular matrix organization	Extracellular matrix organization	Laminin interactions							-1.77743	0.00867366	30
REACTOME_ASSEMBLY_OF_COLLAGEN_FIBRILS_AND_OTHER_MULTIMERIC_STRUCTURES	Extracellular matrix organization	Collagen biosynthesis and modifying enzymes	Assembly of collagen fibrils and other multimeric structures				-1.68389	0.0234321	58	-2.01121	0.000216624	58
REACTOME_COLLAGEN_FORMATION	Extracellular matrix organization	Collagen biosynthesis and modifying enzymes	Collagen formation				-1.64405	0.0241314	85	-1.97396	9.53014e-05	85
REACTOME_ECM_PROTEOGLYCANS	Extracellular matrix organization	Proteoglycans	ECM proteoglycans				-1.57864	0.0494704	68	-2.10802	2.70878e-05	68
REACTOME_ELASTIC_FIBRE_FORMATION	Extracellular matrix organization	Elastic fibre formation	Elastic fibre formation							-2.07578	0.000119437	42
REACTOME_MOLECULES_ASSOCIATED_WITH_ELASTIC_FIBRES	Extracellular matrix organization	Elastic fibre formation	Molecules associated with elastic fibres							-2.00501	0.00117018	35
REACTOME_NONSENSE_MEDIATED_DECAY_NMD	Gene Expression	RNA decay and surveillance	Nonsense-mediated mRNA decay	1.8726	0.000660141	114				2.56974	3.95149e-12	114
REACTOME_RRNA_PROCESSING	Gene Expression	RNA processing	rRNA processing	1.6993	0.00265489	201				2.97307	5.73799e-26	201
REACTOME_REGULATION_OF_MECP2_EXPRESSION_AND_ACTIVITY	Gene Expression	Regulation of gene expression	Regulation of MECP2 expression and activity	-1.6532	0.0430225	31
REACTOME_TRANSCRIPTIONAL_REGULATION_BY_MECP2	Gene Expression	Regulation of gene expression	Transcriptional regulation by MECP2	-1.69142	0.0157955	54
REACTOME_NUCLEAR_ENVELOPE_NE_REASSEMBLY	Cell Cycle and DNA Repair	M Phase	Nuclear Envelope Reassembly	-1.59164	0.0163773	75	1.52318	0.0471591	73
REACTOME_TP53_REGULATES_METABOLIC_GENES	Gene Expression	Transcription	Tp53 regulates metabolic genes				-1.84758	0.00183664	86
REACTOME_TRANSPORT_OF_MATURE_TRANSCRIPT_TO_CYTOPLASM	Gene Expression	RNA transport	Transport of mature transcript to cytoplasm				1.69833	0.0119682	81	2.25674	8.71299e-07	81
REACTOME_SNRNP_ASSEMBLY	Gene Expression	RNA processing	SnRNP assembly				1.74751	0.00962058	54	2.44127	2.73436e-07	54
REACTOME_TRANSPORT_OF_THE_SLBP_DEPENDANT_MATURE_MRNA	Gene Expression	RNA transport	Transport of the SLBP dependent mature mRNA				1.913	0.00683444	36	2.21211	5.73921e-05	36
REACTOME_REGULATION_OF_TP53_ACTIVITY	Gene Expression	Regulation of gene expression	Regulation of TP53 activity				1.93869	6.56937e-05	157	1.88374	1.23171e-05	157
REACTOME_REGULATION_OF_TP53_ACTIVITY_THROUGH_PHOSPHORYLATION	Gene Expression	Regulation of gene expression	Regulation of TP53 activity through phosphorylation				1.95076	0.000332888	91	2.14434	5.90186e-06	91
REACTOME_TRANSPORT_OF_MATURE_MRNAS_DERIVED_FROM_INTRONLESS_TRANSCRIPTS	Gene Expression	RNA transport	Transport of mature mRNAs derived from intronless transcripts				2.08926	0.000818456	43	2.3167	4.17651e-06	43
REACTOME_TRANSCRIPTIONAL_REGULATION_BY_E2F6	Gene Expression	Regulation of gene expression	Transcriptional regulation by E2F6				2.17862	0.000551552	34
REACTOME_TRANSCRIPTIONAL_REGULATION_BY_TP53	Gene Expression	Regulation of gene expression	Transcriptional regulation by TP53							1.43103	0.00235111	360
REACTOME_RNA_POLYMERASE_II_PRE_TRANSCRIPTION_EVENTS	Gene Expression	Transcription	RNA polymerase II pre-transcription events							1.43241	0.0497398	80
REACTOME_TRANSCRIPTIONAL_REGULATION_BY_RUNX1	Gene Expression	Regulation of gene expression	Transcriptional regulation by RUNX1							1.46021	0.0072354	215
REACTOME_STABILIZATION_OF_P53	Gene Expression	Regulation of gene expression	Stabilization of p53							1.49753	0.0499034	54
REACTOME_REGULATION_OF_RUNX3_EXPRESSION_AND_ACTIVITY	Gene Expression	Regulation of gene expression	Regulation of RUNX3 expression and activity							1.5194	0.0444977	54
REACTOME_AUF1_HNRNP_D0_BINDS_AND_DESTABILIZES_MRNA	Gene Expression	RNA stability regulation	AUF1 (HNRNP D0) binds and destabilizes mRNA							1.55889	0.0233686	53
REACTOME_HDMS_DEMETHYLATE_HISTONES	Gene Expression	Epigenetic regulation	HDMs demethylate histones							1.5894	0.0285111	45
REACTOME_RUNX1_REGULATES_GENES_INVOLVED_IN_MEGAKARYOCYTE_DIFFERENTIATION_AND_PLATELET_FUNCTION	Gene Expression	Transcriptional regulation by RUNX1	Runx1 regulates genes involved in megakaryocyte differentiation and platelet function							1.59349	0.0168693	84
REACTOME_ERCC6_CSB_AND_EHMT2_G9A_POSITIVELY_REGULATE_RRNA_EXPRESSION	Gene Expression	Epigenetic regulation	ERCC6/CSB and EHMT2/G9a positively regulate rRNA expression							1.61521	0.0128958	65
REACTOME_RMTS_METHYLATE_HISTONE_ARGININES	Gene Expression	Epigenetic regulation	RMTs methylate histone arginines							1.65436	0.011906	69
REACTOME_PRC2_METHYLATES_HISTONES_AND_DNA	Gene Expression	Epigenetic regulation of gene expression	Prc2 methylates histones and dna							1.66206	0.004334	62
REACTOME_RNA_POLYMERASE_II_TRANSCRIPTION_TERMINATION	Gene Expression	Transcription	RNA Polymerase II transcription termination							1.67072	0.010046	66
REACTOME_RNA_POLYMERASE_I_TRANSCRIPTION	Gene Expression	Transcription	RNA Polymerase I transcription							1.67901	0.00258875	97
REACTOME_DNA_METHYLATION	Gene Expression	Epigenetic regulation	DNA methylation							1.70939	0.00648459	53
REACTOME_RNA_POLYMERASE_I_PROMOTER_ESCAPE	Gene Expression	Transcription	RNA polymerase I promoter escape							1.74976	0.00557117	77
REACTOME_NEGATIVE_EPIGENETIC_REGULATION_OF_RRNA_EXPRESSION	Gene Expression	Epigenetic regulation	Negative epigenetic regulation of rRNA expression							1.75159	0.00121668	95
REACTOME_RNA_POLYMERASE_II_TRANSCRIBES_SNRNA_GENES	Gene Expression	Transcription	RNA Polymerase II transcribes snRNA genes							1.75217	0.00206025	74
REACTOME_EPIGENETIC_REGULATION_OF_GENE_EXPRESSION	Gene Expression	Epigenetic regulation	Epigenetic regulation of gene expression							1.75562	0.000434039	133
REACTOME_POSITIVE_EPIGENETIC_REGULATION_OF_RRNA_EXPRESSION	Gene Expression	Epigenetic regulation	Positive epigenetic regulation of rRNA expression							1.77318	0.00228601	92
REACTOME_RNA_POLYMERASE_III_TRANSCRIPTION	Gene Expression	Transcription	RNA Polymerase III transcription							1.7796	0.00725994	41
REACTOME_MRNA_SPLICING	Gene Expression	RNA splicing	mRNA splicing							1.79109	1.02368e-05	211
REACTOME_PKMTS_METHYLATE_HISTONE_LYSINES	Gene Expression	Epigenetic regulation	PKMTs methylate histone lysines							1.82735	0.00185925	66
REACTOME_B_WICH_COMPLEX_POSITIVELY_REGULATES_RRNA_EXPRESSION	Gene Expression	Epigenetic regulation	B-WICH complex positively regulates rRNA expression							1.87009	0.00152076	77
REACTOME_DEADENYLATION_DEPENDENT_MRNA_DECAY	Gene Expression	RNA decay and surveillance	Deadenylation dependent mRNA decay							1.8945	0.000828702	53
REACTOME_CHROMATIN_MODIFYING_ENZYMES	Gene Expression	Chromatin organization	Chromatin modifying enzymes							1.94246	1.3849e-07	258
REACTOME_SIRT1_NEGATIVELY_REGULATES_RRNA_EXPRESSION	Gene Expression	Epigenetic regulation	SIRT1 negatively regulates rRNA expression							1.97117	0.000488513	57
REACTOME_GENE_SILENCING_BY_RNA	Gene Expression	RNA silencing	Gene silencing by RNA							1.99205	4.85241e-06	124
REACTOME_HATS_ACETYLATE_HISTONES	Gene Expression	Epigenetic regulation	HATs acetylate histones							2.12767	1.10466e-06	128
REACTOME_PROCESSING_OF_CAPPED_INTRON_CONTAINING_PRE_MRNA	Gene Expression	RNA processing	Processing of capped intron containing pre mRNA							2.16853	9.27563e-12	279
REACTOME_TRANSCRIPTIONAL_REGULATION_BY_SMALL_RNAS	Gene Expression	RNA silencing	Transcriptional regulation by small RNAs							2.18528	2.19796e-06	96
REACTOME_RRNA_MODIFICATION_IN_THE_NUCLEUS_AND_CYTOSOL	Gene Expression	RNA processing	rRNA modification in the nucleus and cytosol							2.37963	1.7881e-07	60
REACTOME_FACTORS_INVOLVED_IN_MEGAKARYOCYTE_DEVELOPMENT_AND_PLATELET_PRODUCTION	Hematopoiesis	Megakaryocyte differentiation and platelet formation	Factors involved in megakaryocyte development and platelet production	-1.5098	0.017756	150
REACTOME_PLATELET_ACTIVATION_SIGNALING_AND_AGGREGATION	Hemostasis	Platelet activation signaling and aggregation	Platelet activation signaling and aggregation							-1.96102	2.19167e-07	241
REACTOME_BINDING_AND_UPTAKE_OF_LIGANDS_BY_SCAVENGER_RECEPTORS	Immune System	Innate Immune System	Binding and uptake of ligands by scavenger receptors	1.98507	0.00363762	36				-1.65218	0.0408806	35
REACTOME_CLASS_I_MHC_MEDIATED_ANTIGEN_PROCESSING_PRESENTATION	Immune System	Adaptive Immune System	Class I MHC mediated antigen processing and presentation	1.44938	0.0157955	366
REACTOME_COMPLEMENT_CASCADE	Immune System	Complement System	Complement cascade				-1.61521	0.0474859	37
REACTOME_CELL_SURFACE_INTERACTIONS_AT_THE_VASCULAR_WALL	Immune System	Cellular interactions	Cell surface interactions at the vascular wall				-1.55975	0.0241314	119	-1.70689	0.00223942	119
REACTOME_CLEC7A_DECTIN_1_SIGNALING	Immune System	Innate Immune System	CLEC7A (Dectin-1) signaling				1.47474	0.0470381	97
REACTOME_MYD88_INDEPENDENT_TLR4_CASCADE	Immune System	Innate Immune System	MYD88-independent TLR4 cascade				1.53519	0.02756	104
REACTOME_INTERFERON_SIGNALING	Immune System	Cytokine Signaling in Immune system	Interferon Signaling				1.5748	0.00568148	176
REACTOME_ANTIVIRAL_MECHANISM_BY_IFN_STIMULATED_GENES	Immune System	Cytokine Signaling in Immune system	Antiviral mechanism by IFN stimulated genes				1.57656	0.0348533	81	1.68722	0.00361827	81
REACTOME_INTERFERON_GAMMA_SIGNALING	Immune System	Cytokine Signaling in Immune system	Interferon gamma signaling				1.58206	0.0234321	79
REACTOME_ADORA2B_MEDIATED_ANTI_INFLAMMATORY_CYTOKINES_PRODUCTION	Immune System	Cytokine Signaling in Immune system	Adora2b mediated anti-inflammatory cytokines production							-2.00713	0.000749371	38
REACTOME_ANTI_INFLAMMATORY_RESPONSE_FAVOURING_LEISHMANIA_PARASITE_INFECTION	Immune System	Immune response regulation	Anti-inflammatory response favouring Leishmania parasite infection							-1.73508	0.00648459	63
REACTOME_FCGR3A_MEDIATED_IL10_SYNTHESIS	Immune System	Cytokine Signaling in Immune system	FCGR3A mediated IL10 synthesis							-1.71271	0.0281396	31
REACTOME_FCGAMMA_RECEPTOR_FCGR_DEPENDENT_PHAGOCYTOSIS	Immune System	Innate Immune System	FCgamma receptor (FCGR) dependent phagocytosis							-1.57807	0.0168638	82
REACTOME_NEUTROPHIL_DEGRANULATION	Immune System	Innate Immune System	Neutrophil degranulation							-1.43319	0.00561511	421
REACTOME_ANTIGEN_PROCESSING_UBIQUITINATION_PROTEASOME_DEGRADATION	Immune System	Adaptive Immune System	Antigen processing - ubiquitination and proteasome degradation							1.28652	0.0304577	295
REACTOME_DECTIN_1_MEDIATED_NONCANONICAL_NF_KB_SIGNALING	Immune System	Innate Immune System	Dectin-1 mediated noncanonical NF-kB signaling							1.58137	0.0151036	60
REACTOME_SELENOAMINO_ACID_METABOLISM	Metabolism	Metabolism of amino acids and derivatives	Selenoamino acid metabolism	2.14325	3.21469e-06	115	-1.85747	0.000722774	115	2.56437	2.31086e-12	115
REACTOME_RESPIRATORY_ELECTRON_TRANSPORT_ATP_SYNTHESIS_BY_CHEMIOSMOTIC_COUPLING_AND_HEAT_PRODUCTION_BY_UNCOUPLING_PROTEINS	Metabolism	Energy metabolism	Respiratory electron transport ATP synthesis by chemiosmotic coupling and heat production by uncoupling proteins	1.71637	0.00428101	126	-2.45562	6.99117e-11	126
REACTOME_RESPIRATORY_ELECTRON_TRANSPORT	Metabolism	Energy metabolism	Respiratory electron transport	1.67286	0.0110662	103	-2.44236	7.52506e-10	103
REACTOME_METABOLISM_OF_STEROIDS	Metabolism	Metabolism of lipids and lipoproteins	Metabolism of steroids	1.65594	0.00698758	142
REACTOME_THE_CITRIC_ACID_TCA_CYCLE_AND_RESPIRATORY_ELECTRON_TRANSPORT	Metabolism	Energy metabolism	The citric acid (TCA) cycle and respiratory electron transport	1.44417	0.0441754	175	-2.12287	1.46946e-07	175
REACTOME_METABOLISM_OF_AMINO_ACIDS_AND_DERIVATIVES	Metabolism	Metabolism of amino acids and derivatives	Metabolism of amino acids and derivatives	1.39163	0.022738	346				1.74454	2.09793e-06	346
REACTOME_METABOLISM_OF_CARBOHYDRATES	Metabolism	Metabolism of carbohydrates	Metabolism of carbohydrates	-1.55407	0.00262591	274
REACTOME_POTASSIUM_CHANNELS	Metabolism	Transport of small molecules	Potassium channels	-1.60869	0.0196079	87				-1.59655	0.0193014	86
REACTOME_CARBOXYTERMINAL_POST_TRANSLATIONAL_MODIFICATIONS_OF_TUBULIN	Metabolism	Post-translational protein modification	Carboxyterminal post translational modifications of tubulin	-1.89179	0.00355953	41				-1.54346	0.0368945	40
REACTOME_HSP90_CHAPERONE_CYCLE_FOR_STEROID_HORMONE_RECEPTORS_SHR_IN_THE_PRESENCE_OF_LIGAND	Metabolism	Metabolism of proteins	HSP90 chaperone cycle for steroid hormone receptors (SHR) in the presence of ligand	-2.00794	0.000446756	54
REACTOME_COMPLEX_I_BIOGENESIS	Metabolism	Energy metabolism	Complex I biogenesis				-2.31607	2.70754e-06	57
REACTOME_ION_CHANNEL_TRANSPORT	Metabolism	Transport of small molecules	Ion channel transport				-1.92386	2.9037e-05	159	-1.66618	0.00217533	160
REACTOME_ION_TRANSPORT_BY_P_TYPE_ATPASES	Metabolism	Transport of small molecules	Ion transport by P-type ATPases				-1.78455	0.00812819	49	-1.65861	0.0158788	50
REACTOME_DETOXIFICATION_OF_REACTIVE_OXYGEN_SPECIES	Metabolism	Detoxification	Detoxification of reactive oxygen species				-1.71971	0.0244016	33	-1.63236	0.0362175	33
REACTOME_METABOLISM_OF_FAT_SOLUBLE_VITAMINS	Metabolism	Metabolism of vitamins and cofactors	Metabolism of fat soluble vitamins				-1.67003	0.0391959	40	-1.56321	0.0320113	40
REACTOME_PROTEIN_LOCALIZATION	Metabolism	Metabolism of proteins	Protein localization				-1.40704	0.048952	159
REACTOME_GLYCOLYSIS	Metabolism	Carbohydrate Metabolism	Glycolysis				1.76884	0.00683444	66	1.52276	0.0372068	68
REACTOME_REGULATION_OF_GLUCOKINASE_BY_GLUCOKINASE_REGULATORY_PROTEIN	Metabolism	Metabolism of carbohydrates	Regulation of glucokinase by glucokinase regulatory protein				2.06987	0.0026571	32	2.27995	1.98547e-05	32
REACTOME_O_LINKED_GLYCOSYLATION_OF_MUCINS	Metabolism	Metabolism of proteins	O-linked glycosylation of mucins							-1.88046	0.00142653	56
REACTOME_PHOSPHOLIPID_METABOLISM	Metabolism	Metabolism of lipids and lipoproteins	Phospholipid metabolism							-1.7719	0.00011759	191
REACTOME_INTEGRATION_OF_ENERGY_METABOLISM	Metabolism	Energy metabolism	Integration of energy metabolism							-1.724	0.00304551	99
REACTOME_GLYCEROPHOSPHOLIPID_BIOSYNTHESIS	Metabolism	Metabolism of lipids and lipoproteins	Glycerophospholipid biosynthesis							-1.67772	0.00290695	114
REACTOME_O_GLYCOSYLATION_OF_TSR_DOMAIN_CONTAINING_PROTEINS	Metabolism	Metabolism of proteins	O glycosylation of TSR domain containing proteins							-1.66049	0.0358631	32
REACTOME_AQUAPORIN_MEDIATED_TRANSPORT	Metabolism	Transport of small molecules	Aquaporin mediated transport							-1.65279	0.0182054	43
REACTOME_SYNTHESIS_OF_PIPS_AT_THE_PLASMA_MEMBRANE	Metabolism	Metabolism of lipids and lipoproteins	Synthesis of PIPs at the plasma membrane							-1.60563	0.0290293	51
REACTOME_PI_METABOLISM	Metabolism	Metabolism of lipids and lipoproteins	PI metabolism							-1.56916	0.0210071	78
REACTOME_PEPTIDE_HORMONE_METABOLISM	Metabolism	Hormone biosynthesis	Peptide hormone metabolism							-1.52549	0.0268225	72
REACTOME_GLUCOSE_METABOLISM	Metabolism	Metabolism of carbohydrates	Glucose metabolism							1.56867	0.0200444	85
REACTOME_ASSOCIATION_OF_TRIC_CCT_WITH_TARGET_PROTEINS_DURING_BIOSYNTHESIS	Metabolism	Metabolism of proteins	Association of TRiC/CCT with target proteins during biosynthesis							1.56915	0.0368945	36
REACTOME_MITOCHONDRIAL_TRANSLATION	Metabolism	Metabolism of proteins	Mitochondrial Translation							2.21307	6.92351e-07	94
REACTOME_TRNA_MODIFICATION_IN_THE_NUCLEUS_AND_CYTOSOL	Metabolism	Metabolism of RNA	tRNA modification in the nucleus and cytosol							2.36739	1.73589e-06	43
REACTOME_CHONDROITIN_SULFATE_DERMATAN_SULFATE_METABOLISM	Metabolism of carbohydrates	Glycosaminoglycan metabolism	Chondroitin sulfate / Dermatan sulfate metabolism	-1.64509	0.0214435	50				-2.01172	0.000316588	50
REACTOME_HEPARAN_SULFATE_HEPARIN_HS_GAG_METABOLISM	Metabolism of carbohydrates	Glycosaminoglycan metabolism	Heparan sulfate / heparin (HS) GAG metabolism	-1.76052	0.00884179	50				-1.93069	0.00106022	50
REACTOME_GLYCOSAMINOGLYCAN_METABOLISM	Metabolism of carbohydrates	Glycosaminoglycan metabolism	Glycosaminoglycan metabolism	-1.94793	0.000127259	116				-1.73851	0.00184378	116
REACTOME_UNFOLDED_PROTEIN_RESPONSE_UPR	Metabolism of proteins	Unfolded Protein Response	Unfolded Protein Response (UPR)	2.84364	5.30697e-18	91				-1.57926	0.0162721	91
REACTOME_ASPARAGINE_N_LINKED_GLYCOSYLATION	Metabolism of proteins	Post-translational protein modification	Asparagine N-linked glycosylation	2.54039	2.52356e-19	295				-1.44122	0.00663402	292
REACTOME_SRP_DEPENDENT_COTRANSLATIONAL_PROTEIN_TARGETING_TO_MEMBRANE	Metabolism of proteins	Protein targeting and translocation	SRP-dependent cotranslational protein targeting to membrane	2.47029	9.29756e-11	111	-1.59823	0.0241314	111	2.33774	6.26764e-09	111
REACTOME_RESPONSE_OF_EIF2AK4_GCN2_TO_AMINO_ACID_DEFICIENCY	Metabolism of proteins	Translation regulation	Response of EIF2AK4 (GCN2) to amino acid deficiency	2.43727	6.12e-10	100	-2.10238	2.18127e-05	100	2.43771	4.87693e-09	100
REACTOME_N_GLYCAN_TRIMMING_IN_THE_ER_AND_CALNEXIN_CALRETICULIN_CYCLE	Metabolism of proteins	Post-translational protein modification	N-glycan trimming in the ER and calnexin/calreticulin cycle	2.42245	6.31618e-08	35				-1.99824	0.00122296	35
REACTOME_TRANSLATION	Metabolism of proteins	Translation	Translation	2.24683	4.57441e-12	291				2.63091	6.86044e-22	291
REACTOME_EUKARYOTIC_TRANSLATION_INITIATION	Metabolism of proteins	Translation	Eukaryotic Translation Initiation	2.23513	1.6352e-07	118	-1.59124	0.0241314	118	2.71335	6.23751e-15	118
REACTOME_EUKARYOTIC_TRANSLATION_ELONGATION	Metabolism of proteins	Translation	Eukaryotic Translation Elongation	2.22614	2.41577e-06	92	-1.73734	0.00683444	92	2.67159	2.31086e-12	92
REACTOME_BIOSYNTHESIS_OF_THE_N_GLYCAN_PRECURSOR_DOLICHOL_LIPID_LINKED_OLIGOSACCHARIDE_LLO_AND_TRANSFER_TO_A_NASCENT_PROTEIN	Metabolism of proteins	Post-translational protein modification	Biosynthesis of the N-glycan precursor dolichol lipid-linked oligosaccharide (LLO) and transfer to a nascent protein	2.13626	7.27103e-05	75
REACTOME_ACTIVATION_OF_THE_MRNA_UPON_BINDING_OF_THE_CAP_BINDING_COMPLEX_AND_EIFS_AND_SUBSEQUENT_BINDING_TO_43S	Metabolism of proteins	Translation	Activation of the mRNA upon binding of the CAP-binding complex and elFs and subsequent binding to 43S	2.08217	0.000291177	59	-1.76951	0.00818415	59	2.45357	9.04313e-08	59
REACTOME_SYNTHESIS_OF_SUBSTRATES_IN_N_GLYCAN_BIOSYTHESIS	Metabolism of proteins	Post-translational protein modification	Synthesis of substrates in N-glycan biosynthesis	2.07336	0.000291503	60
REACTOME_TRNA_AMINOACYLATION	Metabolism of proteins	Translation	tRNA aminoacylation	1.87716	0.011058	42				1.8713	0.00517201	42
REACTOME_POST_TRANSLATIONAL_MODIFICATION_SYNTHESIS_OF_GPI_ANCHORED_PROTEINS	Metabolism of proteins	Post-translational protein modification	Post translational modification synthesis of gpi anchored proteins				-1.54543	0.0486357	70	-1.5158	0.0358631	70
REACTOME_TRNA_PROCESSING	Metabolism of proteins	RNA processing	tRNA processing				1.67212	0.00921919	108	2.67542	3.6549e-13	108
REACTOME_TRNA_PROCESSING_IN_THE_NUCLEUS	Metabolism of proteins	RNA processing	tRNA processing in the nucleus				1.91003	0.00236405	58	2.53026	1.05937e-08	58
REACTOME_O_LINKED_GLYCOSYLATION	Metabolism of proteins	Post-translational protein modification	O-linked glycosylation							-1.98091	2.69623e-05	98
REACTOME_SMOOTH_MUSCLE_CONTRACTION	Muscle contraction	Muscle contraction	Smooth muscle contraction							-1.83635	0.00587989	39
REACTOME_MUSCLE_CONTRACTION	Muscle contraction	Muscle contraction	Muscle contraction							-1.69501	0.000450708	175
REACTOME_SENSORY_PERCEPTION	Nervous System	Nervous System	Sensory perception							-1.60287	0.00218458	199
REACTOME_VISUAL_PHOTOTRANSDUCTION	Nervous System	Sensory System	Visual phototransduction				-1.52797	0.0474859	78	-1.61978	0.0164269	79
REACTOME_SENSORY_PROCESSING_OF_SOUND_BY_OUTER_HAIR_CELLS_OF_THE_COCHLEA	Nervous System	Sensory System	Sensory processing of sound by outer hair cells of the cochlea							-1.67666	0.021552	48
REACTOME_CARDIAC_CONDUCTION	Nervous System	Cardiovascular signaling	Cardiac conduction							-1.52459	0.0162487	112
REACTOME_NEURONAL_SYSTEM	Neuronal System	Neuronal System	Neuronal System	-1.82674	8.21859e-07	345				-1.84326	8.80713e-08	344
REACTOME_GABA_RECEPTOR_ACTIVATION	Neuronal System	Synaptic transmission	GABA receptor activation	-1.5576	0.0441754	47				-1.5818	0.0281172	46
REACTOME_TRANSMISSION_ACROSS_CHEMICAL_SYNAPSES	Neuronal System	Synaptic transmission	Transmission across chemical synapses	-1.62983	0.000754969	230				-1.83974	7.92117e-06	230
REACTOME_RET_SIGNALING	Neuronal System	Receptor tyrosine kinase signaling	RET signaling	-1.65978	0.032948	38				-1.81661	0.00617786	38
REACTOME_ACTIVATION_OF_NMDA_RECEPTORS_AND_POSTSYNAPTIC_EVENTS	Neuronal System	Synaptic transmission	Activation of NMDA receptors and postsynaptic events	-1.66366	0.0158465	86				-1.79468	0.00189383	85
REACTOME_GAP_JUNCTION_TRAFFICKING_AND_REGULATION	Neuronal System	Gap junctions	Gap junction trafficking and regulation	-1.66713	0.0357627	44
REACTOME_GABA_B_RECEPTOR_ACTIVATION	Neuronal System	Synaptic transmission	GABA B receptor activation	-1.73505	0.0146541	39				-1.83448	0.00516022	38
REACTOME_NEUROTRANSMITTER_RECEPTORS_AND_POSTSYNAPTIC_SIGNAL_TRANSMISSION	Neuronal System	Synaptic transmission	Neurotransmitter receptors and postsynaptic signal transmission	-1.74496	0.000391324	173				-1.91406	7.79509e-06	173
REACTOME_ASSEMBLY_AND_CELL_SURFACE_PRESENTATION_OF_NMDA_RECEPTORS	Neuronal System	Synaptic transmission	Assembly and cell surface presentation of NMDA receptors	-1.74702	0.0180024	42				-1.78069	0.00908293	41
REACTOME_RHO_GTPASES_ACTIVATE_IQGAPS	Neuronal System	Small GTPase signaling	Rho GTPases activate IQGAPs	-1.87032	0.0107588	31				-1.69193	0.0205949	30
REACTOME_NCAM_SIGNALING_FOR_NEURITE_OUT_GROWTH	Neuronal System	Cell adhesion molecules	NCAM signaling for neurite out growth				-1.9005	0.00307108	60	-2.22747	3.51818e-06	60
REACTOME_NCAM1_INTERACTIONS	Neuronal System	Cell adhesion molecules	NCAM1 interactions				-1.87997	0.00683444	40	-2.14378	5.82083e-05	40
REACTOME_NEUROTRANSMITTER_RELEASE_CYCLE	Neuronal System	Neurotransmitter release	Neurotransmitter release cycle				-1.6352	0.043891	42
REACTOME_CDC42_GTPASE_CYCLE	Neuronal System	Small GTPase signaling	CDC42 GTPase cycle							-1.42305	0.0331237	150
REACTOME_AUTOPHAGY	Organelle biogenesis and maintenance	Autophagy	Autophagy	1.49272	0.0379036	148
REACTOME_KINESINS	Organelle Biogenesis and Maintenance	Cytoskeleton dynamics	Kinesins	-1.88922	0.00279913	58				-1.5524	0.0362175	57
REACTOME_LYSOSOME_VESICLE_BIOGENESIS	Organelle biogenesis and maintenance	Lysosome functionality	Lysosome vesicle biogenesis				-1.70893	0.0293967	35
REACTOME_ANCHORING_OF_THE_BASAL_BODY_TO_THE_PLASMA_MEMBRANE	Organelle biogenesis and maintenance	Cilium assembly	Anchoring of the basal body to the plasma membrane				1.71446	0.00759743	96
REACTOME_INTRAFLAGELLAR_TRANSPORT	Organelle Biogenesis and Maintenance	Cilium assembly	Intraflagellar transport							-1.64406	0.0320113	48
REACTOME_SUMOYLATION_OF_UBIQUITINYLATION_PROTEINS	Post-translational modification	Sumoylation	Sumoylation of ubiquitinylation proteins				1.6412	0.040965	39	2.17136	7.46474e-05	39
REACTOME_SUMOYLATION_OF_CHROMATIN_ORGANIZATION_PROTEINS	Post-translational modification	Sumoylation	Sumoylation of chromatin organization proteins				1.70958	0.0106725	66	1.9222	0.000561709	66
REACTOME_SUMOYLATION	Post-translational modification	Sumoylation	Sumoylation				1.72601	0.000737084	179	1.62444	0.000889942	178
REACTOME_SUMOYLATION_OF_SUMOYLATION_PROTEINS	Post-translational modification	Sumoylation	Sumoylation of sumoylation proteins				1.87494	0.00812819	35	2.08551	0.000488513	35
REACTOME_SUMOYLATION_OF_DNA_DAMAGE_RESPONSE_AND_REPAIR_PROTEINS	Post-translational modification	Sumoylation	Sumoylation of DNA damage response and repair proteins				1.92622	0.000332888	76	1.94004	0.000342356	76
REACTOME_SUMOYLATION_OF_RNA_BINDING_PROTEINS	Post-translational modification	Sumoylation	Sumoylation of RNA binding proteins				1.95143	0.00454014	47	2.07794	0.000261581	47
REACTOME_RESOLUTION_OF_SISTER_CHROMATID_COHESION	Cell Cycle and DNA Repair	Mitosis	Resolution of sister chromatid cohesion	-1.64675	0.00505299	124	1.60022	0.00921919	122
REACTOME_SUMOYLATION_OF_TRANSCRIPTION_COFACTORS	Post-translational protein modification	SUMOylation	Sumoylation of transcription cofactors				1.62428	0.0355772	43
REACTOME_NEDDYLATION	Post-translational protein modification	Neddylation	Neddylation							1.41091	0.00649882	236
REACTOME_UCH_PROTEINASES	Post-translational protein modification	Deubiquitination	UCH proteinases							1.67463	0.00517201	96
REACTOME_METALLOPROTEASE_DUBS	Post-translational protein modification	Deubiquitination	Metalloprotease DUBs							1.9753	0.00124075	33
REACTOME_DEUBIQUITINATION	Post-translational protein modification	Deubiquitination	Deubiquitination							2.04616	3.88422e-09	264
REACTOME_UB_SPECIFIC_PROCESSING_PROTEASES	Post-translational protein modification	Ubiquitin processing	UB specific processing proteases							2.13804	1.3233e-08	187
REACTOME_NRAGE_SIGNALS_DEATH_THROUGH_JNK	Programmed Cell Death	Apoptosis	NRAGE signals death through JNK							-1.78668	0.00422902	58
REACTOME_REPRODUCTION	Reproduction	Reproduction	Reproduction							1.8059	0.000188628	121
REACTOME_HEDGEHOG_LIGAND_BIOGENESIS	Signal Transduction	Signaling by Hedgehog	Hedgehog ligand biogenesis	2.02411	0.000713716	63
REACTOME_EGFR_DOWNREGULATION	Signal Transduction	Signaling by Receptor Tyrosine Kinases	EGFR downregulation	1.80264	0.0184772	31
REACTOME_NGF_STIMULATED_TRANSCRIPTION	Signal Transduction	Signaling by Receptor Tyrosine Kinases	Ngf stimulated transcription	1.78309	0.0163773	39
REACTOME_SIGNALING_BY_ALK_IN_CANCER	Signal Transduction	Signaling by Receptor Tyrosine Kinases	Signaling by Alk in cancer	1.67724	0.0400083	55
REACTOME_SIGNALING_BY_ROBO_RECEPTORS	Signal Transduction	Axon guidance	Signaling by ROBO receptors	1.50809	0.0180024	212				1.7248	4.60389e-05	211
REACTOME_GPCR_LIGAND_BINDING	Signal Transduction	G protein signaling	GPCR ligand binding	-1.34482	0.0430561	307				-1.32858	0.0266033	308
REACTOME_SIGNALING_BY_WNT	Signal Transduction	Signaling by WNT	Signaling by WNT	-1.42879	0.0216883	305
REACTOME_RHO_GTPASE_EFFECTORS	Signal Transduction	Signaling by Rho GTPases	Rho GTPase effectors	-1.44206	0.0108778	306
REACTOME_G_ALPHA_I_SIGNALLING_EVENTS	Signal Transduction	G protein signaling	G alpha i signalling events	-1.45041	0.0195102	224				-1.43947	0.0128877	224
REACTOME_TCF_DEPENDENT_SIGNALING_IN_RESPONSE_TO_WNT	Signal Transduction	Signaling by WNT	TCF dependent signaling in response to WNT	-1.5488	0.00790221	210				1.49958	0.00223942	213
REACTOME_FORMATION_OF_THE_BETA_CATENIN_TCF_TRANSACTIVATING_COMPLEX	Signal Transduction	Signaling by WNT	Formation of the beta catenin tcf transactivating complex	-1.56112	0.0270436	79				2.06197	4.28712e-05	80
REACTOME_RHO_GTPASES_ACTIVATE_FORMINS	Signal Transduction	Signaling by Rho GTPases	Rho GTPases activate Formins	-1.58565	0.00813473	138	1.70352	0.00236405	136
REACTOME_G_ALPHA_S_SIGNALLING_EVENTS	Signal Transduction	G protein signaling	G alpha s signalling events	-1.64351	0.00877953	113				-1.50716	0.018748	112
REACTOME_DAG_AND_IP3_SIGNALING	Signal Transduction	Phosphoinositide signaling system	DAG and IP3 signaling	-1.65549	0.0252996	39				-1.80137	0.00708604	38
REACTOME_DEACTIVATION_OF_THE_BETA_CATENIN_TRANSACTIVATING_COMPLEX	Signal Transduction	Signaling by WNT	Deactivation of the beta catenin transactivating complex	-1.66959	0.0218887	40
REACTOME_OPIOID_SIGNALLING	Signal Transduction	Neurotransmitter receptor signaling	Opioid signaling	-1.68672	0.0157955	84				-1.58843	0.0158788	83
REACTOME_DISASSEMBLY_OF_THE_DESTRUCTION_COMPLEX_AND_RECRUITMENT_OF_AXIN_TO_THE_MEMBRANE	Signal Transduction	Signaling by WNT	Disassembly of the destruction complex and recruitment of axin to the membrane	-1.70299	0.0274538	30
REACTOME_G_PROTEIN_MEDIATED_EVENTS	Signal Transduction	G protein signaling	G protein mediated events	-1.72727	0.0157955	51				-1.80882	0.004334	50
REACTOME_SIGNALING_BY_WNT_IN_CANCER	Signal Transduction	Signaling by WNT	Signaling by WNT in cancer	-1.74797	0.0217172	32
REACTOME_CA_DEPENDENT_EVENTS	Signal Transduction	Ca2+ signalling pathway	Ca2+ dependent events	-1.81373	0.00813473	35				-1.77287	0.00900568	34
REACTOME_NUCLEAR_EVENTS_MEDIATED_BY_NFE2L2	Signal Transduction	NFE2L2 mediated oxidative stress response	Nuclear events mediated by NFE2L2				-1.59943	0.0355772	77	1.61075	0.0222376	77
REACTOME_TAK1_DEPENDENT_IKK_AND_NF_KAPPA_B_ACTIVATION	Signal Transduction	Signaling by NF-kappaB	TAK1 dependent IKK and NF-kappaB activation				1.60242	0.0373694	42
REACTOME_TNFR1_INDUCED_NFKAPPAB_SIGNALING_PATHWAY	Signal Transduction	Signaling by TNF	TNFR1 induced NF-kappaB signaling pathway				1.65292	0.0308362	33
REACTOME_SMAD2_SMAD3_SMAD4_HETEROTRIMER_REGULATES_TRANSCRIPTION	Signal Transduction	Signaling by TGFB family members	Smad2 smad3 smad4 heterotrimer regulates transcription				1.78039	0.0228023	34
REACTOME_RHOF_GTPASE_CYCLE	Signal Transduction	Signaling by Rho GTPases	Rhof gtpase cycle				1.81517	0.00818415	42
REACTOME_TRANSCRIPTIONAL_ACTIVITY_OF_SMAD2_SMAD3_SMAD4_HETEROTRIMER	Signal Transduction	Signaling by TGFB family members	Transcriptional activity of smad2 smad3 smad4 heterotrimer				1.97724	0.00176497	48
REACTOME_SIGNALING_BY_PDGF	Signal Transduction	Signaling by PDGF	Signaling by PDGF							-2.38082	7.65992e-08	57
REACTOME_TGF_BETA_RECEPTOR_SIGNALING_ACTIVATES_SMADS	Signal Transduction	Signaling by TGF-beta family members	TGF beta receptor signaling activates SMADs							-1.95508	0.000427605	46
REACTOME_G_ALPHA_12_13_SIGNALLING_EVENTS	Signal Transduction	G protein signaling	G alpha 12/13 signalling events							-1.94327	0.000197176	78
REACTOME_G_ALPHA_Q_SIGNALLING_EVENTS	Signal Transduction	G protein signaling	G alpha q signalling events							-1.87482	2.47402e-05	168
REACTOME_GPER1_SIGNALING	Signal Transduction	Steroid hormone receptor signaling	GPER1 signaling							-1.82769	0.00416854	40
REACTOME_G_ALPHA_Z_SIGNALLING_EVENTS	Signal Transduction	G protein signaling	G alpha z signalling events							-1.82711	0.00442605	42
REACTOME_REGULATION_OF_INSULIN_SECRETION	Signal Transduction	Insulin signaling	Regulation of insulin secretion							-1.81381	0.00142653	71
REACTOME_EPHB_MEDIATED_FORWARD_SIGNALING	Signal Transduction	Signaling by ephrin receptors	EPHB mediated forward signaling							-1.80804	0.00538339	42
REACTOME_SIGNALING_BY_FGFR1_IN_DISEASE	Signal Transduction	Signaling by Receptor Tyrosine Kinases	Signaling by FGFR1 in disease							-1.79437	0.0067846	33
REACTOME_SIGNALING_BY_VEGF	Signal Transduction	Signaling by VEGF	Signaling by VEGF							-1.7575	0.000895892	103
REACTOME_GLUCAGON_LIKE_PEPTIDE_1_GLP1_REGULATES_INSULIN_SECRETION	Signal Transduction	Insulin signaling	Glucagon-like peptide 1 (GLP1) regulates insulin secretion							-1.75571	0.0147104	37
REACTOME_EPH_EPHRIN_SIGNALING	Signal Transduction	Signaling by receptor tyrosine kinases	EPH-Ephrin signaling							-1.74697	0.00241688	91
REACTOME_VASOPRESSIN_REGULATES_RENAL_WATER_HOMEOSTASIS_VIA_AQUAPORINS	Signal Transduction	Water homeostasis	Vasopressin regulates renal water homeostasis via aquaporins							-1.74028	0.0108331	36
REACTOME_REGULATION_OF_INSULIN_LIKE_GROWTH_FACTOR_IGF_TRANSPORT_AND_UPTAKE_BY_INSULIN_LIKE_GROWTH_FACTOR_BINDING_PROTEINS_IGFBPS	Signal Transduction	Insulin signaling	Regulation of insulin like growth factor (IGF) transport and uptake by insulin like growth factor binding proteins (IGFBPs)							-1.70123	0.00374804	109
REACTOME_SIGNALING_BY_TGF_BETA_RECEPTOR_COMPLEX	Signal Transduction	Signaling by TGF-beta family members	Signaling by TGF-beta receptor complex							-1.69743	0.00516022	90
REACTOME_TRANSLOCATION_OF_SLC2A4_GLUT4_TO_THE_PLASMA_MEMBRANE	Signal Transduction	Insulin signaling	Translocation of SLC2A4 (GLUT4) to the plasma membrane							-1.67448	0.00729191	69
REACTOME_SIGNALING_BY_INSULIN_RECEPTOR	Signal Transduction	Insulin signaling	Signaling by Insulin Receptor							-1.65275	0.0108604	71
REACTOME_SIGNALING_BY_TGFB_FAMILY_MEMBERS	Signal Transduction	Signaling by TGF-beta family members	Signaling by TGF-beta family members							-1.65127	0.00639575	116
REACTOME_NETRIN_1_SIGNALING	Signal Transduction	Axon guidance	Netrin-1 signaling							-1.59795	0.0233687	46
REACTOME_SIGNALING_BY_FGFR_IN_DISEASE	Signal Transduction	Signaling by FGFR	Signaling by FGFR in disease							-1.55607	0.0342855	54
REACTOME_CELL_DEATH_SIGNALLING_VIA_NRAGE_NRIF_AND_NADE	Signal Transduction	p75 NTR receptor-mediated signalling	Cell death signalling via NRAGE							-1.52704	0.0368945	75
REACTOME_SIGNALING_BY_HEDGEHOG	Signal Transduction	Signaling by Hedgehog	Signaling by Hedgehog							-1.48864	0.0178853	143
REACTOME_SIGNALING_BY_RECEPTOR_TYROSINE_KINASES	Signal Transduction	Signaling by Receptor Tyrosine Kinases	Signaling by Receptor Tyrosine Kinases							-1.46988	0.000851579	488
REACTOME_RHO_GTPASE_CYCLE	Signal Transduction	Signaling by Rho GTPases	Rho GTPase cycle							-1.36556	0.00584351	438
REACTOME_KEAP1_NFE2L2_PATHWAY	Signal Transduction	NFE2L2 mediated oxidative stress response	KEAP1-NFE2L2 pathway							1.33928	0.0497398	103
REACTOME_ESTROGEN_DEPENDENT_GENE_EXPRESSION	Signal Transduction	Signaling by Nuclear Receptors	Estrogen dependent gene expression							1.49759	0.00975176	137
REACTOME_DEGRADATION_OF_AXIN	Signal Transduction	Signaling by WNT	Degradation of Axin							1.63674	0.0121774	53
REACTOME_ACTIVATED_PKN1_STIMULATES_TRANSCRIPTION_OF_AR_ANDROGEN_RECEPTOR_REGULATED_GENES_KLK2_AND_KLK3	Signal Transduction	Signaling by Rho GTPases	Activated pkn1 stimulates transcription of ar androgen receptor regulated genes klk2 and klk3							1.73648	0.005301	55
REACTOME_STIMULI_SENSING_CHANNELS	Transport of small molecules	Ion channel transport	Stimuli sensing channels				-1.51211	0.0445494	89
REACTOME_TRANSPORT_OF_INORGANIC_CATIONS_ANIONS_AND_AMINO_ACIDS_OLIGOPEPTIDES	Transport of small molecules	Transport of small molecules	Transport of inorganic cations/anions and amino acids/oligopeptides							-1.43767	0.0355346	95
REACTOME_CARGO_CONCENTRATION_IN_THE_ER	Transport of small molecules	Vesicle mediated transport	Cargo concentration in the ER	2.12751	0.000291503	32
REACTOME_TRANSPORT_TO_THE_GOLGI_AND_SUBSEQUENT_MODIFICATION	Transport of small molecules	Vesicle mediated transport	Transport to the Golgi and subsequent modification	2.02787	2.41577e-06	179
REACTOME_INTRA_GOLGI_AND_RETROGRADE_GOLGI_TO_ER_TRAFFIC	Transport of small molecules	Vesicle mediated transport	Intra-Golgi and retrograde Golgi to ER traffic	1.65635	0.0042335	199
REACTOME_AMINO_ACID_TRANSPORT_ACROSS_THE_PLASMA_MEMBRANE	Transport of small molecules	Amino acid transport	Amino acid transport across the plasma membrane				-1.8295	0.0203785	31
REACTOME_TRANSFERRIN_ENDOCYTOSIS_AND_RECYCLING	Transport of small molecules	Endocytosis	Transferrin endocytosis and recycling				-1.7209	0.035088	30
REACTOME_COPII_MEDIATED_VESICLE_TRANSPORT	Vesicle-mediated transport	Transport to the Golgi and subsequent modification	COPII-mediated vesicle transport	2.29047	2.41577e-06	67
REACTOME_ER_TO_GOLGI_ANTEROGRADE_TRANSPORT	Vesicle-mediated transport	Transport to the Golgi and subsequent modification	ER to Golgi anterograde transport	2.19833	6.31618e-08	150
REACTOME_COPI_MEDIATED_ANTEROGRADE_TRANSPORT	Vesicle-mediated transport	Golgi-to-ER retrograde traffic	COPI-mediated anterograde transport	1.95618	0.000438239	98
REACTOME_INTRA_GOLGI_TRAFFIC	Vesicle-mediated transport	Golgi-to-ER retrograde traffic	Intra Golgi traffic	1.89604	0.00636619	44
REACTOME_TRANS_GOLGI_NETWORK_VESICLE_BUDDING	Vesicle-mediated transport	Trans-Golgi network vesicle budding	Trans-Golgi network vesicle budding	1.71748	0.0169598	72
REACTOME_GOLGI_ASSOCIATED_VESICLE_BIOGENESIS	Vesicle-mediated transport	Transport to the Golgi and subsequent modification	Golgi associated vesicle biogenesis	1.68857	0.0283455	56
REACTOME_RETROGRADE_TRANSPORT_AT_THE_TRANS_GOLGI_NETWORK	Vesicle-mediated transport	Trans-Golgi network vesicle budding	Retrograde transport at the trans-Golgi network	1.67786	0.0400083	49				1.74866	0.00527325	49
REACTOME_RECYCLING_PATHWAY_OF_L1	Vesicle-mediated transport	Endocytosis and recycling	Recycling pathway of L1							-1.86911	0.00232927	47
REACTOME_COPI_INDEPENDENT_GOLGI_TO_ER_RETROGRADE_TRAFFIC	Vesicle-mediated transport	Golgi-to-ER retrograde traffic	COPI-independent Golgi to ER retrograde traffic							-1.63276	0.0183234	50

## Sheet: 16h
pathway	level1	level2	name	NES_0_glc	padj_0_glc	size_0_glc	NES_atf4_0_glc	padj_atf4_0_glc	size_atf4_0_glc	NES_atf6_0_glc	padj_atf6_0_glc	size_atf6_0_glc
REACTOME_CELL_CELL_COMMUNICATION	Cell Communication	Cell Communication	Cell-Cell communication							-1.95428	6.41689e-06	120
REACTOME_PROTEIN_PROTEIN_INTERACTIONS_AT_SYNAPSES	Cell Communication	Synapse organization and signaling	Protein-protein interactions at synapses				-1.93098	0.000174214	73	-1.75695	0.00141103	73
REACTOME_NEUREXINS_AND_NEUROLIGINS	Cell Communication	Synapse organization and signaling	Neurexins and Neuroligins				-1.82291	0.00456819	48	-1.6243	0.0112315	49
REACTOME_INTEGRIN_CELL_SURFACE_INTERACTIONS	Cell Communication	Cell surface interactions	Integrin cell surface interactions				-1.4648	0.0400292	81	-2.0749	1.37271e-05	81
REACTOME_NON_INTEGRIN_MEMBRANE_ECM_INTERACTIONS	Cell Communication	Cell-extracellular matrix interactions	Non-integrin membrane ECM interactions							-2.34351	4.97413e-08	57
REACTOME_ADHERENS_JUNCTIONS_INTERACTIONS	Cell Communication	Cell junction organization	Adherens junctions interactions							-2.23949	2.22032e-06	31
REACTOME_CELL_CELL_JUNCTION_ORGANIZATION	Cell Communication	Cell junction organization	Cell-cell junction organization							-2.15172	6.57357e-06	59
REACTOME_SEMAPHORIN_INTERACTIONS	Cell Communication	Cell-cell signaling	Semaphorin interactions							-1.96781	0.000170334	60
REACTOME_L1CAM_INTERACTIONS	Cell Communication	Cell-cell signaling	L1CAM interactions							-1.78189	0.000183162	113
REACTOME_CELL_JUNCTION_ORGANIZATION	Cell Communication	Cell junction organization	Cell junction organization							-1.71218	0.00225625	86
REACTOME_ASSEMBLY_OF_THE_ORC_COMPLEX_AT_THE_ORIGIN_OF_REPLICATION	Cell Cycle and DNA Repair	DNA Replication	Assembly of the ORC complex at the origin of replication	-1.50686	0.0351856	60				1.89284	0.000418811	59
REACTOME_INHIBITION_OF_DNA_RECOMBINATION_AT_TELOMERE	Cell Cycle and DNA Repair	DNA Repair	Inhibition of DNA recombination at telomere	-1.5123	0.0351856	58				1.86028	0.000780904	57
REACTOME_CYCLIN_A_CDK2_ASSOCIATED_EVENTS_AT_S_PHASE_ENTRY	Cell Cycle and DNA Repair	Cell cycle regulation	Cyclin A CDK2 associated events at S phase entry	-1.60669	0.0092822	85	2.33611	7.25295e-08	85	2.33599	4.22792e-08	85
REACTOME_NUCLEOTIDE_EXCISION_REPAIR	Cell Cycle and DNA Repair	Nucleotide Excision Repair (NER)	Nucleotide excision repair	-1.69709	0.00159596	110	2.37428	8.64323e-10	110	2.16298	1.6557e-07	110
REACTOME_GLOBAL_GENOME_NUCLEOTIDE_EXCISION_REPAIR_GG_NER	Cell Cycle and DNA Repair	Nucleotide Excision Repair (NER)	Global Genome Nucleotide Excision Repair (GG-NER)	-1.70675	0.001995	84	2.36966	3.47653e-08	84	2.18376	7.42215e-07	84
REACTOME_CYCLIN_D_ASSOCIATED_EVENTS_IN_G1	Cell Cycle and DNA Repair	Cell cycle regulation	Cyclin D associated events in G1	-1.71804	0.0109181	45
REACTOME_THE_ROLE_OF_GTSE1_IN_G2_M_PROGRESSION_AFTER_G2_CHECKPOINT	Cell Cycle and DNA Repair	G2/M Checkpoints	The role of GTSE1 in G2/M progression after G2 checkpoint	-1.72739	0.00470988	76	2.56794	6.35537e-10	76	2.00482	4.98082e-05	76
REACTOME_CONDENSATION_OF_PROPHASE_CHROMOSOMES	Cell Cycle and DNA Repair	Mitosis	Condensation of prophase chromosomes	-1.74681	0.00337801	64				1.94388	0.000253058	63
REACTOME_APC_C_CDH1_MEDIATED_DEGRADATION_OF_CDC20_AND_OTHER_APC_C_CDH1_TARGETED_PROTEINS_IN_LATE_MITOSIS_EARLY_G1	Cell Cycle and DNA Repair	M Phase	APC/C:Cdh1-mediated degradation of Cdc20 and other APC/C:Cdh1 targets	-1.78354	0.000991421	72	2.79654	6.03883e-13	72	2.6129	3.55064e-12	72
REACTOME_DUAL_INCISION_IN_TC_NER	Cell Cycle and DNA Repair	DNA Repair	Dual incision in transcription-coupled nucleotide excision repair (TC-NER)	-1.81519	0.0016166	65	2.26513	1.09324e-06	65	1.99336	7.80289e-05	65
REACTOME_TRANSCRIPTION_COUPLED_NUCLEOTIDE_EXCISION_REPAIR_TC_NER	Cell Cycle and DNA Repair	Nucleotide Excision Repair (NER)	Transcription-Coupled Nucleotide Excision Repair (TC-NER)	-1.88343	0.000443485	78	2.35909	1.57598e-07	78	2.24429	4.47957e-07	78
REACTOME_MITOTIC_PROPHASE	Cell Cycle and DNA Repair	Mitosis	Mitotic prophase	-1.93349	5.86588e-06	133	1.43643	0.0229834	133	2.12147	9.14426e-08	132
REACTOME_NUCLEAR_ENVELOPE_NE_REASSEMBLY	Cell Cycle and DNA Repair	M Phase	Nuclear Envelope Reassembly	-2.00464	4.55461e-05	75	2.28689	9.65794e-07	75	1.57891	0.01173	75
REACTOME_REGULATION_OF_PLK1_ACTIVITY_AT_G2_M_TRANSITION	Cell Cycle and DNA Repair	G2/M Checkpoints	Regulation of PLK1 activity at G2/M transition	-2.0515	3.91474e-06	86	1.45495	0.0425101	86	1.51837	0.0149852	86
REACTOME_DUAL_INCISION_IN_GG_NER	Cell Cycle and DNA Repair	Nucleotide Excision Repair (NER)	Dual incision in GG-NER	-2.05568	0.000130664	41	2.0817	0.000169788	41	2.06993	0.000117515	41
REACTOME_NUCLEAR_ENVELOPE_BREAKDOWN	Cell Cycle and DNA Repair	M Phase	Nuclear Envelope Breakdown	-2.05883	6.36512e-05	53	1.92891	0.000848165	53	1.94087	0.000538837	53
REACTOME_APC_C_MEDIATED_DEGRADATION_OF_CELL_CYCLE_PROTEINS	Cell Cycle and DNA Repair	M Phase	APC/C-mediated degradation of cell cycle proteins	-2.07027	2.8404e-06	86	2.64653	8.21898e-12	86	2.68434	9.01299e-14	86
REACTOME_TRANSLESION_SYNTHESIS_BY_Y_FAMILY_DNA_POLYMERASES_BYPASSES_LESIONS_ON_DNA_TEMPLATE	Cell Cycle and DNA Repair	DNA damage bypass	Translesion synthesis by Y family DNA polymerases bypasses lesions on DNA template	-2.0776	8.99148e-05	39	1.89274	0.00244139	39	1.62419	0.0218141	39
REACTOME_NUCLEAR_PORE_COMPLEX_NPC_DISASSEMBLY	Cell Cycle and DNA Repair	M Phase	Nuclear Pore Complex NPC Disassembly	-2.09012	3.64663e-05	36	1.82832	0.0067385	36	1.77196	0.00415428	36
REACTOME_MEIOTIC_RECOMBINATION	Cell Cycle and DNA Repair	Meiosis	Meiotic recombination	-2.09555	5.85069e-06	76				2.05154	4.03029e-05	75
REACTOME_DNA_DAMAGE_BYPASS	Cell Cycle and DNA Repair	DNA damage tolerance	DNA damage bypass	-2.09662	1.79368e-05	48	1.803	0.00507885	48	1.75668	0.00525966	48
REACTOME_RECRUITMENT_OF_MITOTIC_CENTROSOME_PROTEINS_AND_COMPLEXES	Cell Cycle and DNA Repair	Mitosis	Recruitment of mitotic centrosome proteins and complexes	-2.10226	3.24502e-06	80	1.61112	0.0149021	80	1.5993	0.00957316	80
REACTOME_FANCONI_ANEMIA_PATHWAY	Cell Cycle and DNA Repair	Double Strand Break Repair	Fanconi anemia pathway	-2.11023	4.90658e-05	39	1.99609	0.000664266	39	1.76737	0.00823855	39
REACTOME_DEPOSITION_OF_NEW_CENPA_CONTAINING_NUCLEOSOMES_AT_THE_CENTROMERE	Cell Cycle and DNA Repair	Chromosome maintenance	Deposition of new CENPA containing nucleosomes at the centromere	-2.12262	7.93882e-06	64	1.75349	0.00286561	64	1.94877	0.000233858	63
REACTOME_TERMINATION_OF_TRANSLESION_DNA_SYNTHESIS	Cell Cycle and DNA Repair	DNA damage bypass	Termination of translesion DNA synthesis	-2.12401	6.95128e-05	32	1.99313	0.000880508	32	1.73764	0.00708959	32
REACTOME_MITOTIC_G2_G2_M_PHASES	Cell Cycle and DNA Repair	Mitosis	Mitotic G2/G2-M phases	-2.14771	1.57812e-10	196	2.26177	4.02334e-10	196	2.08986	7.1929e-09	196
REACTOME_RECRUITMENT_OF_NUMA_TO_MITOTIC_CENTROSOMES	Cell Cycle and DNA Repair	Mitosis	Recruitment of NUMA to mitotic centrosomes	-2.19387	9.01766e-08	93	1.64652	0.00601811	93	1.52829	0.0108485	93
REACTOME_DNA_REPAIR	Cell Cycle and DNA Repair	DNA Repair	DNA Repair	-2.21328	3.08863e-16	321	2.09995	3.34164e-11	321	2.19399	3.22502e-14	320
REACTOME_AURKA_ACTIVATION_BY_TPX2	Cell Cycle and DNA Repair	Mitosis	AURKA activation by TPX2	-2.23785	2.67136e-07	71	1.56627	0.02007	71	1.57366	0.0210269	71
REACTOME_G2_M_DNA_DAMAGE_CHECKPOINT	Cell Cycle and DNA Repair	Cell cycle checkpoints	G2/M DNA damage checkpoint	-2.2492	2.44889e-08	86	1.52144	0.0244585	86	1.98371	7.40068e-05	85
REACTOME_RECOGNITION_OF_DNA_DAMAGE_BY_PCNA_CONTAINING_REPLICATION_COMPLEX	Cell Cycle and DNA Repair	DNA Replication	Recognition of DNA damage by PCNA containing replication complex	-2.26012	2.66663e-06	30	2.03025	0.000667136	30	1.99666	0.000380836	30
REACTOME_PROCESSING_OF_DNA_DOUBLE_STRAND_BREAK_ENDS	Cell Cycle and DNA Repair	DNA Repair	Processing of DNA double strand break ends	-2.27983	3.6514e-08	89	1.47601	0.0349582	89	2.12633	3.35031e-06	88
REACTOME_ORC1_REMOVAL_FROM_CHROMATIN	Cell Cycle and DNA Repair	DNA Replication	ORC1 removal from chromatin	-2.28771	1.07953e-07	69	2.59565	1.32863e-09	69	2.52545	3.02984e-10	69
REACTOME_HDR_THROUGH_SINGLE_STRAND_ANNEALING_SSA	Cell Cycle and DNA Repair	DNA Repair	HDR through single strand annealing (SSA)	-2.3059	2.88077e-07	37				1.82234	0.00202089	37
REACTOME_BASE_EXCISION_REPAIR	Cell Cycle and DNA Repair	DNA Repair	Base excision repair	-2.30837	1.43269e-08	80	1.77559	0.00259971	80	2.3856	8.27127e-09	79
REACTOME_TELOMERE_C_STRAND_LAGGING_STRAND_SYNTHESIS	Cell Cycle and DNA Repair	DNA Replication	Telomere C-strand lagging strand synthesis	-2.31683	5.2633e-07	34	2.21669	3.87155e-05	34	2.17613	4.19839e-05	34
REACTOME_SWITCHING_OF_ORIGINS_TO_A_POST_REPLICATIVE_STATE	Cell Cycle and DNA Repair	DNA Replication	Switching of origins to a post replicative state	-2.32583	2.49739e-09	90	2.56816	3.12647e-11	90	2.5725	5.51852e-12	90
REACTOME_EXTENSION_OF_TELOMERES	Cell Cycle and DNA Repair	DNA Replication	Extension of telomeres	-2.34304	5.14873e-08	51	2.35642	4.26629e-07	51	2.38647	1.81352e-07	51
REACTOME_RESOLUTION_OF_ABASIC_SITES_AP_SITES	Cell Cycle and DNA Repair	DNA Repair	Resolution of abasic sites (AP sites)	-2.39079	1.61553e-08	37	2.17388	8.28048e-05	37	2.14048	4.0397e-05	37
REACTOME_M_PHASE	Cell Cycle and DNA Repair	M Phase	M Phase	-2.39509	3.17818e-24	402	2.24134	1.31339e-16	402	2.31304	5.22567e-21	401
REACTOME_RESOLUTION_OF_D_LOOP_STRUCTURES	Cell Cycle and DNA Repair	DNA Repair	Resolution of D loop structures	-2.40266	1.07657e-08	35				1.50568	0.0367068	35
REACTOME_TELOMERE_MAINTENANCE	Cell Cycle and DNA Repair	DNA Repair	Telomere maintenance	-2.40804	8.72744e-11	103	2.1468	4.25073e-07	103	2.32669	3.97683e-09	102
REACTOME_DNA_REPLICATION_PRE_INITIATION	Cell Cycle and DNA Repair	DNA Replication	DNA replication pre initiation	-2.42323	6.30731e-14	151	2.41723	7.00495e-12	151	2.62561	1.33957e-16	150
REACTOME_DNA_DOUBLE_STRAND_BREAK_REPAIR	Cell Cycle and DNA Repair	Double Strand Break Repair	DNA Double Strand Break Repair	-2.4528	1.29643e-14	159	1.6654	0.000411359	159	2.05152	2.02828e-07	158
REACTOME_MITOTIC_METAPHASE_AND_ANAPHASE	Cell Cycle and DNA Repair	M Phase	Mitotic Metaphase and Anaphase	-2.46137	2.0122e-18	232	2.68827	5.60102e-21	232	2.30347	1.49508e-13	232
REACTOME_MITOTIC_SPINDLE_CHECKPOINT	Cell Cycle and DNA Repair	Cell Cycle Checkpoints	Mitotic Spindle Checkpoint	-2.462	7.98135e-13	110	2.32732	2.75924e-09	110	2.12617	3.37275e-07	110
REACTOME_SEPARATION_OF_SISTER_CHROMATIDS	Cell Cycle and DNA Repair	M Phase	Separation of Sister Chromatids	-2.49953	9.94415e-18	187	2.6478	5.8067e-17	187	2.23136	6.54563e-11	187
REACTOME_ACTIVATION_OF_ATR_IN_RESPONSE_TO_REPLICATION_STRESS	Cell Cycle and DNA Repair	Cell cycle checkpoints	Activation of ATR in response to replication stress	-2.54817	2.05222e-11	37	2.25247	2.18274e-05	37	2.07271	0.000105809	37
REACTOME_CHROMOSOME_MAINTENANCE	Cell Cycle and DNA Repair	Chromosome maintenance	Chromosome maintenance	-2.55206	2.52143e-15	130	2.38448	2.71936e-10	130	2.29557	1.68151e-09	129
REACTOME_HOMOLOGOUS_DNA_PAIRING_AND_STRAND_EXCHANGE	Cell Cycle and DNA Repair	DNA Repair	Homologous DNA pairing and strand exchange	-2.56369	1.34615e-10	43	1.63958	0.0233369	43	1.75637	0.00377479	43
REACTOME_MITOTIC_PROMETAPHASE	Cell Cycle and DNA Repair	M Phase	Mitotic Prometaphase	-2.57659	1.37598e-20	200	2.08716	4.45451e-08	200	1.9149	1.17371e-06	200
REACTOME_MITOTIC_G1_PHASE_AND_G1_S_TRANSITION	Cell Cycle and DNA Repair	Cell cycle regulation	Mitotic G1 phase and G1/S transition	-2.59511	1.13418e-17	147	2.4936	4.21736e-13	147	2.11165	1.12353e-07	147
REACTOME_G2_M_CHECKPOINTS	Cell Cycle and DNA Repair	Cell Cycle Checkpoints	G2/M Checkpoints	-2.60564	9.44458e-18	157	2.38579	1.47754e-11	157	2.53713	7.81871e-15	156
REACTOME_ACTIVATION_OF_THE_PRE_REPLICATIVE_COMPLEX	Cell Cycle and DNA Repair	DNA Replication	Activation of the pre replicative complex	-2.608	2.91747e-12	33	2.32217	1.2605e-05	33	2.0296	0.000228406	33
REACTOME_HOMOLOGY_DIRECTED_REPAIR	Cell Cycle and DNA Repair	Double Strand Break Repair	Homology Directed Repair	-2.61449	9.03503e-17	130	1.80107	0.000171907	130	2.14449	9.92022e-08	129
REACTOME_RESOLUTION_OF_SISTER_CHROMATID_COHESION	Cell Cycle and DNA Repair	Mitosis	Resolution of sister chromatid cohesion	-2.61901	1.03243e-16	124	2.35354	3.29398e-10	124	1.71812	0.000257508	124
REACTOME_S_PHASE	Cell Cycle and DNA Repair	DNA Replication	S phase	-2.63295	1.53312e-19	161	2.64251	4.85515e-16	161	2.49184	2.31815e-14	161
REACTOME_HDR_THROUGH_HOMOLOGOUS_RECOMBINATION_HRR	Cell Cycle and DNA Repair	DNA Repair	HDR through Homologous Recombination (HRR)	-2.6408	9.40846e-14	68	2.09317	7.5257e-05	68	1.94748	0.000220885	68
REACTOME_CELL_CYCLE_CHECKPOINTS	Cell Cycle and DNA Repair	Cell Cycle Checkpoints	Cell Cycle Checkpoints	-2.65982	3.66543e-29	279	2.48509	2.45999e-18	279	2.55303	4.72707e-22	278
REACTOME_DNA_REPLICATION	Cell Cycle and DNA Repair	DNA Replication	DNA Replication	-2.66049	2.1982e-21	177	2.44587	3.27743e-13	177	2.60913	1.16416e-17	176
REACTOME_SYNTHESIS_OF_DNA	Cell Cycle and DNA Repair	DNA Replication	DNA strand elongation	-2.70523	2.86206e-19	119	2.78931	9.97032e-17	119	2.64552	2.14585e-15	119
REACTOME_DNA_STRAND_ELONGATION	Cell Cycle and DNA Repair	DNA Replication	DNA strand elongation	-2.72737	6.75647e-16	32	2.34066	2.63227e-06	32	2.1754	2.23928e-05	32
REACTOME_FORMATION_OF_INCISION_COMPLEX_IN_GG_NER	Cell Cycle and DNA Repair	DNA Repair	Formation of incision Compex in GG NER				1.74763	0.00880359	43	1.53111	0.0241578	43
REACTOME_DNA_DAMAGE_RECOGNITION_IN_GG_NER	Cell Cycle and DNA Repair	DNA Repair	DNA damage recognition in global genome nucleotide excision repair (GG-NER)				2.10362	0.000174094	38	2.17465	2.44978e-05	38
REACTOME_FORMATION_OF_TC_NER_PRE_INCISION_COMPLEX	Cell Cycle and DNA Repair	DNA Repair	Formation of TC-NER pre-incision complex				2.25981	6.41459e-06	53	1.94449	0.000513619	53
REACTOME_G1_S_DNA_DAMAGE_CHECKPOINTS	Cell Cycle and DNA Repair	Cell Cycle Checkpoints	G1/S DNA Damage Checkpoints				2.32222	2.76659e-07	65	2.37692	3.50708e-08	65
REACTOME_SCF_BETA_TRCP_MEDIATED_DEGRADATION_OF_EMI1	Cell Cycle and DNA Repair	Regulation of mitotic cell cycle	SCF(Beta-TRCP) mediated degradation of Emi1				2.47137	1.15409e-07	53	2.43814	5.5724e-08	53
REACTOME_SCF_SKP2_MEDIATED_DEGRADATION_OF_P27_P21	Cell Cycle and DNA Repair	Regulation of mitotic cell cycle	SCF(SKP2) mediated degradation of P27/P21				2.47215	5.18428e-08	60	2.46628	4.68827e-09	60
REACTOME_OXIDATIVE_STRESS_INDUCED_SENESCENCE	Cell Cycle and DNA Repair	Cellular Senescence	Oxidative stress induced senescence							1.49397	0.0120453	110
REACTOME_NONHOMOLOGOUS_END_JOINING_NHEJ	Cell Cycle and DNA Repair	DNA Repair	Nonhomologous end joining (NHEJ)							1.59971	0.00953471	59
REACTOME_DNA_DOUBLE_STRAND_BREAK_RESPONSE	Cell Cycle and DNA Repair	DNA Repair	DNA double strand break response							1.62088	0.00858993	68
REACTOME_MEIOTIC_SYNAPSIS	Cell Cycle and DNA Repair	Meiosis	Meiotic synapsis							1.84895	0.000761852	65
REACTOME_SENESCENCE_ASSOCIATED_SECRETORY_PHENOTYPE_SASP	Cell Cycle and DNA Repair	Cellular Senescence	Senescence associated secretory phenotype (SASP)							2.00149	4.48735e-06	99
REACTOME_CELLULAR_SENESCENCE	Cell Cycle and DNA Repair	Cellular Senescence	Cellular Senescence							2.0065	1.26837e-07	179
REACTOME_BASE_EXCISION_REPAIR_AP_SITE_FORMATION	Cell Cycle and DNA Repair	DNA Repair	Base excision repair AP site formation							2.01017	0.000237769	52
REACTOME_RECOGNITION_AND_ASSOCIATION_OF_DNA_GLYCOSYLASE_WITH_SITE_CONTAINING_AN_AFFECTED_PURINE	Cell Cycle and DNA Repair	DNA Repair	Recognition and association of DNA glycosylase with site containing an affected purine							2.17039	1.71028e-05	45
REACTOME_DNA_DAMAGE_TELOMERE_STRESS_INDUCED_SENESCENCE	Cell Cycle and DNA Repair	DNA Damage Response	DNA damage telomere stress-induced senescence							2.32903	2.19196e-07	68
REACTOME_CELLULAR_RESPONSE_TO_STARVATION	Cellular Responses to Stimuli	Cellular Responses to Stimuli	Cellular response to starvation	2.49175	1.87935e-15	153	2.72744	8.23545e-18	153	2.94708	3.89938e-26	153
REACTOME_RESPONSE_TO_ELEVATED_PLATELET_CYTOSOLIC_CA2	Cellular Responses to Stimuli	Cellular Responses to Stimuli	Response to elevated platelet cytosolic Ca2+	1.61282	0.00797981	123				-2.09447	1.57864e-07	122
REACTOME_CELLULAR_RESPONSE_TO_HYPOXIA	Cellular Responses to Stimuli	Cellular Responses to Stimuli	Cellular response to hypoxia				2.17384	8.29709e-06	72	2.07199	5.95096e-05	71
REACTOME_CIRCADIAN_CLOCK	Cellular Responses to Stimuli	Circadian rhythm	Circadian clock				-1.74029	0.00370076	67
REACTOME_ION_HOMEOSTASIS	Cellular Responses to Stimuli	Ion homeostasis	Ion homeostasis							-1.68755	0.00760742	49
REACTOME_IRE1ALPHA_ACTIVATES_CHAPERONES	Cellular Responses to Stress	Cellular Responses to Stress	IRE1alpha activates chaperones	2.42391	2.27098e-09	50
REACTOME_PERK_REGULATES_GENE_EXPRESSION	Cellular Responses to Stress	Cellular Responses to Stress	PERK regulates gene expression	2.2132	7.50484e-06	32
REACTOME_CELLULAR_RESPONSE_TO_CHEMICAL_STRESS	Cellular Responses to Stress	Cellular Responses to Stress	Cellular response to chemical stress				1.36241	0.0410497	190
REACTOME_HSF1_DEPENDENT_TRANSACTIVATION	Cellular Responses to Stress	Heat shock response	HSF1 dependent transactivation				-1.80101	0.00771828	35
REACTOME_CELLULAR_RESPONSE_TO_HEAT_STRESS	Cellular Responses to Stress	Heat shock response	Cellular response to heat stress							1.32536	0.046307	99
REACTOME_REGULATION_OF_EXPRESSION_OF_SLITS_AND_ROBOS	Developmental Biology	Axon guidance	Regulation of expression of SLITs and ROBOS	1.65067	0.000905116	167	3.2451	2.09824e-32	167	3.08986	1.0243e-31	167
REACTOME_MEIOSIS	Developmental Biology	Cell cycle	Meiosis	-1.96386	1.58468e-05	105				1.96739	1.45082e-05	104
REACTOME_RUNX1_REGULATES_TRANSCRIPTION_OF_GENES_INVOLVED_IN_DIFFERENTIATION_OF_HSCS	Developmental Biology	Hematopoiesis	RUNX1 regulates transcription of genes involved in differentiation of HSCs				1.77699	0.000443227	118	2.1979	2.12234e-08	117
REACTOME_TRANSCRIPTIONAL_REGULATION_OF_GRANULOPOIESIS	Developmental Biology	Hematopoiesis	Transcriptional regulation of granulopoiesis							1.68288	0.00320466	79
REACTOME_DISEASES_OF_SIGNAL_TRANSDUCTION_BY_GROWTH_FACTOR_RECEPTORS_AND_SECOND_MESSENGERS	Disease	Disease	Diseases of signal transduction by growth factor receptors and second messengers	1.28975	0.0411355	409	-1.32555	0.0145492	410
REACTOME_DISEASES_OF_PROGRAMMED_CELL_DEATH	Disease	Disease	Diseases of programmed cell death	-1.56082	0.0111174	92				1.47585	0.0128571	91
REACTOME_SARS_COV_1_MODULATES_HOST_TRANSLATION_MACHINERY	Disease	Viral Infection	SARS-CoV-1 modulates host translation machinery	1.99683	0.000164646	36	3.08645	4.0369e-17	36	2.60081	4.04944e-10	36
REACTOME_SARS_COV_1_INFECTION	Disease	Viral Infection	SARS-CoV-1 infection	1.66675	0.00190678	138	2.0375	2.35295e-06	137	2.18087	1.49685e-08	137
REACTOME_MATURATION_OF_SARS_COV_2_SPIKE_PROTEIN	Disease	Viral Infection	Maturation of SARS-CoV-2 spike protein	1.6439	0.0218317	37
REACTOME_INFLUENZA_INFECTION	Disease	Viral Infection	Influenza infection	1.52805	0.00909634	155	3.32224	5.74288e-34	155	2.98492	4.88578e-27	155
REACTOME_HIV_LIFE_CYCLE	Disease	Viral Infection	HIV Life Cycle	-1.46817	0.0107715	148	2.01816	7.8844e-07	147	2.04658	6.60349e-07	147
REACTOME_HIV_INFECTION	Disease	Viral Infection	HIV Infection	-1.55127	0.00125687	226	2.34488	4.12266e-13	225	2.16969	3.59094e-11	225
REACTOME_HCMV_INFECTION	Disease	Viral Infection	HCMV infection	-1.65486	0.000697337	151	1.55108	0.0049843	151	1.54723	0.00289827	150
REACTOME_INTERACTIONS_OF_VPR_WITH_HOST_CELLULAR_PROTEINS	Disease	Viral Infection	Interactions of Vpr with host cellular proteins	-1.79133	0.00576745	37	1.95197	0.00172329	37	1.96375	0.000465226	37
REACTOME_HOST_INTERACTIONS_OF_HIV_FACTORS	Disease	Viral Infection	Host interactions of HIV factors	-1.81121	0.000120766	127	2.44071	2.58606e-11	127	2.21018	3.18486e-08	127
REACTOME_DISEASES_OF_MITOTIC_CELL_CYCLE	Disease	Genetic Disease	Diseases of mitotic cell cycle	-1.93055	0.00102478	38	1.61555	0.0235514	38	1.73978	0.00575626	38
REACTOME_HCMV_EARLY_EVENTS	Disease	Viral Infection	HCMV early events	-2.00434	3.17548e-06	127	1.38502	0.0375848	127	1.40815	0.0187963	126
REACTOME_NUCLEAR_IMPORT_OF_REV_PROTEIN	Disease	Viral Infection	Nuclear import of Rev protein	-2.05028	0.000205156	34	2.06392	0.000361897	34	1.92321	0.00195453	34
REACTOME_EXPORT_OF_VIRAL_RIBONUCLEOPROTEINS_FROM_NUCLEUS	Disease	Viral Infection	Export of viral ribonucleoproteins from nucleus	-2.07183	0.000140948	33	1.63843	0.0393959	33	1.77573	0.00501597	33
REACTOME_INTERACTIONS_OF_REV_WITH_HOST_CELLULAR_PROTEINS	Disease	Viral Infection	Interactions of Rev with host cellular proteins	-2.13235	2.23669e-05	37	2.16028	0.000103047	37	2.00746	0.000252152	37
REACTOME_NS1_MEDIATED_EFFECTS_ON_HOST_PATHWAYS	Disease	Viral Infection	NS1 mediated effects on host pathways	-2.17243	1.1904e-05	41	1.78757	0.00400793	41	1.80578	0.00355473	41
REACTOME_VIRAL_MESSENGER_RNA_SYNTHESIS	Disease	Viral Infection	Viral messenger RNA synthesis	-2.28559	1.15497e-06	44	2.18811	4.11432e-05	44	1.73111	0.00501597	44
REACTOME_DISEASES_OF_DNA_REPAIR	Disease	DNA Repair	Diseases of DNA Repair	-2.5703	2.91747e-12	51	1.65576	0.0120799	51	1.66304	0.0112309	51
REACTOME_HCMV_LATE_EVENTS	Disease	Infectious disease	HCMV late events				1.33697	0.0481615	106	1.92095	6.84124e-05	105
REACTOME_DISORDERS_OF_TRANSMEMBRANE_TRANSPORTERS	Disease	Metabolic Disease	Disorders of transmembrane transporters				1.41179	0.0164693	160
REACTOME_SARS_COV_INFECTIONS	Disease	Infectious disease	SARS coronavirus infections				1.57007	0.000125569	385	1.62522	1.0811e-05	386
REACTOME_SARS_COV_2_INFECTION	Disease	Viral Infection	SARS-CoV-2 infection				1.64868	0.000124676	276	1.71252	1.0811e-05	277
REACTOME_ABC_TRANSPORTER_DISORDERS	Disease	Genetic Disease	ABC transporter disorders				1.72608	0.00448769	76	1.47064	0.0271982	75
REACTOME_TRANSCRIPTION_OF_THE_HIV_GENOME	Disease	Viral Infection	Transcription of the HIV genome				1.77247	0.00405108	69	1.87047	0.000585984	69
REACTOME_HIV_TRANSCRIPTION_INITIATION	Disease	Viral Infection	HIV transcription initiation				1.77684	0.0049843	47	1.60314	0.0134514	47
REACTOME_HIV_ELONGATION_ARREST_AND_RECOVERY	Disease	Viral Infection	HIV elongation arrest and recovery				1.83274	0.0049843	32	1.69772	0.0106297	32
REACTOME_DEFECTIVE_CFTR_CAUSES_CYSTIC_FIBROSIS	Disease	Genetic Disease	Defective CFTR causes cystic fibrosis				2.08723	0.000103047	59	1.65076	0.00577611	59
REACTOME_HIV_TRANSCRIPTION_ELONGATION	Disease	Viral Infection	HIV transcription elongation				2.10244	0.000174214	42	1.88027	0.000810098	42
REACTOME_SARS_COV_2_HOST_INTERACTIONS	Disease	Viral Infection	SARS-CoV-2 host interactions				2.28169	8.82442e-11	183	2.15079	5.58493e-10	184
REACTOME_SARS_COV_1_HOST_INTERACTIONS	Disease	Viral Infection	SARS-CoV-1 host interactions				2.75061	4.99321e-14	92	2.23925	5.95213e-08	92
REACTOME_SARS_COV_2_MODULATES_HOST_TRANSLATION_MACHINERY	Disease	Viral Infection	SARS-CoV-2 modulates host translation machinery				3.12624	1.05167e-18	50	2.7162	2.35866e-12	50
REACTOME_DISEASES_ASSOCIATED_WITH_O_GLYCOSYLATION_OF_PROTEINS	Disease	Metabolic Disease	Diseases associated with O-glycosylation of proteins							-2.03428	5.05941e-05	57
REACTOME_DISEASES_ASSOCIATED_WITH_GLYCOSAMINOGLYCAN_METABOLISM	Disease	Metabolic Disease	Diseases associated with glycosaminoglycan metabolism							-1.74677	0.00381314	37
REACTOME_PARASITE_INFECTION	Disease	Infectious disease	Parasite infection							-1.54096	0.0235308	55
REACTOME_LEISHMANIA_INFECTION	Disease	Infectious disease	Leishmania infection							-1.39787	0.0207762	146
REACTOME_DISEASES_OF_GLYCOSYLATION	Disease	Metabolic Disease	Diseases of glycosylation							-1.36607	0.0407243	128
REACTOME_DISEASES_OF_METABOLISM	Disease	Metabolic Disease	Diseases of metabolism							-1.32816	0.0383583	222
REACTOME_SARS_COV_2_ACTIVATES_MODULATES_INNATE_AND_ADAPTIVE_IMMUNE_RESPONSES	Disease	Viral Infection	SARS-CoV-2 activates and modulates innate and adaptive immune responses							1.46374	0.0161695	108
REACTOME_EXTRACELLULAR_MATRIX_ORGANIZATION	Extracellular matrix organization	Extracellular matrix organization	Extracellular matrix organization				-1.3817	0.0191702	271	-2.2972	7.01103e-15	272
REACTOME_DEGRADATION_OF_THE_EXTRACELLULAR_MATRIX	Extracellular matrix organization	Extracellular matrix organization	Degradation of the extracellular matrix							-2.01051	1.42282e-06	122
REACTOME_COLLAGEN_CHAIN_TRIMERIZATION	Extracellular matrix organization	Extracellular matrix organization	Collagen chain trimerization							-1.90836	0.000800909	40
REACTOME_COLLAGEN_DEGRADATION	Extracellular matrix organization	Extracellular matrix organization	Collagen degradation							-1.84934	0.000696889	57
REACTOME_COLLAGEN_BIOSYNTHESIS_AND_MODIFYING_ENZYMES	Extracellular matrix organization	Extracellular matrix organization	Collagen biosynthesis and modifying enzymes							-1.80847	0.00149097	63
REACTOME_LAMININ_INTERACTIONS	Extracellular matrix organization	Extracellular matrix organization	Laminin interactions							-1.69849	0.0145703	30
REACTOME_ELASTIC_FIBRE_FORMATION	Extracellular matrix organization	Elastic fibre formation	Elastic fibre formation							-2.27778	1.23433e-06	42
REACTOME_MOLECULES_ASSOCIATED_WITH_ELASTIC_FIBRES	Extracellular matrix organization	Elastic fibre formation	Molecules associated with elastic fibres							-2.27159	1.82214e-06	35
REACTOME_ECM_PROTEOGLYCANS	Extracellular matrix organization	Proteoglycans	ECM proteoglycans							-2.23805	6.06512e-07	68
REACTOME_ASSEMBLY_OF_COLLAGEN_FIBRILS_AND_OTHER_MULTIMERIC_STRUCTURES	Extracellular matrix organization	Collagen biosynthesis and modifying enzymes	Assembly of collagen fibrils and other multimeric structures							-1.76509	0.00229087	58
REACTOME_COLLAGEN_FORMATION	Extracellular matrix organization	Collagen biosynthesis and modifying enzymes	Collagen formation							-1.62231	0.00577651	85
REACTOME_NONSENSE_MEDIATED_DECAY_NMD	Gene Expression	RNA decay and surveillance	Nonsense-mediated mRNA decay	2.06922	1.25619e-06	114	3.42636	4.38012e-33	114	3.17628	2.97551e-30	114
REACTOME_FOXO_MEDIATED_TRANSCRIPTION	Gene Expression	Transcription factor regulation	FOXO mediated transcription	1.69275	0.0107715	59
REACTOME_RRNA_PROCESSING	Gene Expression	RNA processing	rRNA processing	1.45893	0.00666425	201	3.91405	1.33845e-67	201	3.30533	1.25704e-47	201
REACTOME_REGULATION_OF_MRNA_STABILITY_BY_PROTEINS_THAT_BIND_AU_RICH_ELEMENTS	Gene Expression	RNA stability regulation	Regulation of mRNA stability by proteins that bind AU-rich elements	-1.43562	0.0422804	85	2.24197	5.32636e-07	85	2.24557	3.63512e-07	85
REACTOME_TP53_REGULATES_TRANSCRIPTION_OF_DNA_REPAIR_GENES	Gene Expression	Regulation of gene expression	TP53 regulates transcription of DNA repair genes	-1.47052	0.0465305	62	1.58133	0.0238264	61	1.8023	0.00109861	61
REACTOME_TRANSCRIPTIONAL_REGULATION_BY_RUNX2	Gene Expression	Regulation of gene expression	Transcriptional regulation by RUNX2	-1.47867	0.029176	115	1.69124	0.00140405	115	1.53278	0.0111593	115
REACTOME_REGULATION_OF_TP53_ACTIVITY_THROUGH_ACETYLATION	Gene Expression	Regulation of gene expression	Regulation of TP53 activity through acetylation	-1.54882	0.045517	30
REACTOME_DNA_METHYLATION	Gene Expression	Epigenetic regulation	DNA methylation	-1.56251	0.0324561	55				1.51458	0.0336316	54
REACTOME_TRANSCRIPTIONAL_REGULATION_BY_TP53	Gene Expression	Regulation of gene expression	Transcriptional regulation by TP53	-1.57207	4.70907e-05	360	1.52538	0.000414759	359	1.61987	2.18488e-05	359
REACTOME_RNA_POLYMERASE_I_TRANSCRIPTION_INITIATION	Gene Expression	Transcription	RNA Polymerase I transcription initiation	-1.57687	0.0351856	44	1.77046	0.00687898	44	1.49143	0.0322694	44
REACTOME_RNA_POLYMERASE_I_TRANSCRIPTION	Gene Expression	Transcription	RNA Polymerase I transcription	-1.58519	0.00577454	99				1.76691	0.000606707	98
REACTOME_REGULATION_OF_MECP2_EXPRESSION_AND_ACTIVITY	Gene Expression	Regulation of gene expression	Regulation of MECP2 expression and activity	-1.63916	0.0336082	31				-1.51104	0.0371147	31
REACTOME_TP53_REGULATES_TRANSCRIPTION_OF_CELL_CYCLE_GENES	Gene Expression	Regulation of gene expression	TP53 regulates transcription of cell cycle genes	-1.65293	0.0116297	49				1.67039	0.00823639	49
REACTOME_ERCC6_CSB_AND_EHMT2_G9A_POSITIVELY_REGULATE_RRNA_EXPRESSION	Gene Expression	Epigenetic regulation	ERCC6/CSB and EHMT2/G9a positively regulate rRNA expression	-1.69901	0.00538371	67				1.48517	0.0281599	66
REACTOME_POSITIVE_EPIGENETIC_REGULATION_OF_RRNA_EXPRESSION	Gene Expression	Epigenetic regulation	Positive epigenetic regulation of rRNA expression	-1.72191	0.00194859	94				1.71434	0.00149097	93
REACTOME_TRANSCRIPTIONAL_REGULATION_BY_MECP2	Gene Expression	Regulation of gene expression	Transcriptional regulation by MECP2	-1.72428	0.00639079	55
REACTOME_RNA_POLYMERASE_II_TRANSCRIPTION_TERMINATION	Gene Expression	Transcription	RNA Polymerase II transcription termination	-1.76472	0.00239988	66	2.0833	4.94752e-05	66	2.35512	9.11567e-08	66
REACTOME_EPIGENETIC_REGULATION_OF_GENE_EXPRESSION	Gene Expression	Epigenetic regulation	Epigenetic regulation of gene expression	-1.81695	6.36512e-05	135				1.64526	0.000956891	134
REACTOME_MRNA_SPLICING	Gene Expression	RNA splicing	mRNA splicing	-1.8518	1.56101e-06	211	2.6696	1.65499e-18	211	2.48754	1.16621e-17	211
REACTOME_REGULATION_OF_TP53_ACTIVITY	Gene Expression	Regulation of gene expression	Regulation of TP53 activity	-1.91539	3.27962e-06	157	1.40774	0.0189424	157	1.74364	0.000112909	157
REACTOME_TRANSCRIPTIONAL_REGULATION_BY_E2F6	Gene Expression	Regulation of gene expression	Transcriptional regulation by E2F6	-1.93107	0.00125588	34
REACTOME_GENE_SILENCING_BY_RNA	Gene Expression	RNA silencing	Gene silencing by RNA	-1.95596	8.14181e-06	126	1.39734	0.0393387	125	1.76829	0.00011628	125
REACTOME_REGULATION_OF_TP53_ACTIVITY_THROUGH_PHOSPHORYLATION	Gene Expression	Regulation of gene expression	Regulation of TP53 activity through phosphorylation	-1.98438	3.25344e-05	91	1.70659	0.00188467	91	1.94521	3.06994e-05	91
REACTOME_TRANSPORT_OF_MATURE_TRANSCRIPT_TO_CYTOPLASM	Gene Expression	RNA transport	Transport of mature transcript to cytoplasm	-2.02595	2.17408e-05	81	2.32847	2.76659e-07	81	2.26733	9.94706e-08	81
REACTOME_TRANSCRIPTIONAL_REGULATION_BY_SMALL_RNAS	Gene Expression	RNA silencing	Transcriptional regulation by small RNAs	-2.04992	3.84344e-06	98	1.5427	0.0178729	98	1.87341	8.68141e-05	97
REACTOME_PROCESSING_OF_CAPPED_INTRON_CONTAINING_PRE_MRNA	Gene Expression	RNA processing	Processing of capped intron containing pre mRNA	-2.06597	6.14764e-12	279	2.66165	6.26808e-23	279	2.57372	1.76895e-22	279
REACTOME_MRNA_SPLICING_MINOR_PATHWAY	Gene Expression	RNA splicing	Minor pathway of mRNA splicing	-2.13566	2.01113e-05	50	2.20446	1.23755e-05	50	1.73541	0.0054782	50
REACTOME_TRANSPORT_OF_THE_SLBP_DEPENDANT_MATURE_MRNA	Gene Expression	RNA transport	Transport of the SLBP dependent mature mRNA	-2.17111	7.50484e-06	36	1.76574	0.0130368	36	1.73271	0.00535446	36
REACTOME_SNRNP_ASSEMBLY	Gene Expression	RNA processing	SnRNP assembly	-2.23499	6.91307e-07	54	2.36668	1.17153e-06	54	2.22112	4.46919e-06	54
REACTOME_TRANSPORT_OF_MATURE_MRNAS_DERIVED_FROM_INTRONLESS_TRANSCRIPTS	Gene Expression	RNA transport	Transport of mature mRNAs derived from intronless transcripts	-2.24377	4.84665e-06	43	1.911	0.00158229	43	1.91757	0.000476468	43
REACTOME_TRANSCRIPTIONAL_REGULATION_BY_NPAS4	Gene Expression	Transcription factor regulation	Transcriptional regulation by NPAS4				-1.76094	0.00983782	31	-1.56371	0.0242928	31
REACTOME_RNA_POLYMERASE_II_TRANSCRIBES_SNRNA_GENES	Gene Expression	Transcription	RNA Polymerase II transcribes snRNA genes				1.48142	0.0410497	74	1.96546	0.000120646	74
REACTOME_RMTS_METHYLATE_HISTONE_ARGININES	Gene Expression	Epigenetic regulation	RMTs methylate histone arginines				1.51104	0.03342	71	1.49418	0.0274173	70
REACTOME_RNA_POLYMERASE_II_PRE_TRANSCRIPTION_EVENTS	Gene Expression	Transcription	RNA polymerase II pre-transcription events				1.63957	0.00906837	79	1.80274	0.000837304	79
REACTOME_DEADENYLATION_DEPENDENT_MRNA_DECAY	Gene Expression	RNA decay and surveillance	Deadenylation dependent mRNA decay				1.65068	0.016045	53	2.08252	6.07778e-05	53
REACTOME_TRANSCRIPTIONAL_REGULATION_BY_RUNX3	Gene Expression	Regulation of gene expression	Transcriptional regulation by RUNX3				1.69795	0.00293578	95	1.71107	0.00117289	95
REACTOME_FORMATION_OF_RNA_POL_II_ELONGATION_COMPLEX	Gene Expression	Transcription	Formation of RNA Pol II elongation complex				1.79737	0.00385328	56	1.7746	0.00315397	56
REACTOME_RNA_POLYMERASE_III_TRANSCRIPTION	Gene Expression	Transcription	RNA Polymerase III transcription				1.95965	0.000800119	41	1.75491	0.00677725	41
REACTOME_REGULATION_OF_RUNX2_EXPRESSION_AND_ACTIVITY	Gene Expression	Regulation of gene expression	Regulation of RUNX2 expression and activity				2.06715	7.49056e-05	70	1.93034	0.000117966	70
REACTOME_FORMATION_OF_THE_EARLY_ELONGATION_COMPLEX	Gene Expression	Transcription	Formation of the early elongation complex				2.25372	5.28614e-05	33	1.7765	0.00501597	33
REACTOME_AUF1_HNRNP_D0_BINDS_AND_DESTABILIZES_MRNA	Gene Expression	RNA stability regulation	AUF1 (HNRNP D0) binds and destabilizes mRNA				2.36052	1.00583e-06	53	2.48183	2.12234e-08	53
REACTOME_REGULATION_OF_RUNX3_EXPRESSION_AND_ACTIVITY	Gene Expression	Regulation of gene expression	Regulation of RUNX3 expression and activity				2.4769	7.63562e-08	54	2.30347	8.44366e-07	54
REACTOME_STABILIZATION_OF_P53	Gene Expression	Regulation of gene expression	Stabilization of p53				2.48071	7.14484e-08	54	2.3613	2.7328e-07	54
REACTOME_RRNA_MODIFICATION_IN_THE_NUCLEUS_AND_CYTOSOL	Gene Expression	RNA processing	rRNA modification in the nucleus and cytosol				3.02368	1.76509e-16	60	2.59669	4.79264e-11	60
REACTOME_TRANSCRIPTIONAL_REGULATION_BY_RUNX1	Gene Expression	Regulation of gene expression	Transcriptional regulation by RUNX1							1.4055	0.00823855	216
REACTOME_HDMS_DEMETHYLATE_HISTONES	Gene Expression	Epigenetic regulation	HDMs demethylate histones							1.47658	0.0385667	46
REACTOME_REGULATION_OF_TP53_EXPRESSION_AND_DEGRADATION	Gene Expression	Regulation of gene expression	Regulation of TP53 expression and degradation							1.54963	0.0235308	36
REACTOME_CHROMATIN_MODIFYING_ENZYMES	Gene Expression	Chromatin organization	Chromatin modifying enzymes							1.55965	0.000737464	259
REACTOME_TRANSCRIPTIONAL_REGULATION_BY_VENTX	Gene Expression	Regulation of gene expression	Transcriptional regulation by VENTX							1.69594	0.00885001	37
REACTOME_HATS_ACETYLATE_HISTONES	Gene Expression	Epigenetic regulation	HATs acetylate histones							1.75749	0.000233858	129
REACTOME_NEGATIVE_EPIGENETIC_REGULATION_OF_RRNA_EXPRESSION	Gene Expression	Epigenetic regulation	Negative epigenetic regulation of rRNA expression							1.80897	0.000409189	96
REACTOME_B_WICH_COMPLEX_POSITIVELY_REGULATES_RRNA_EXPRESSION	Gene Expression	Epigenetic regulation	B-WICH complex positively regulates rRNA expression							1.84311	0.000336209	78
REACTOME_SIRT1_NEGATIVELY_REGULATES_RRNA_EXPRESSION	Gene Expression	Epigenetic regulation	SIRT1 negatively regulates rRNA expression							1.88215	0.000715629	58
REACTOME_RNA_POLYMERASE_I_PROMOTER_ESCAPE	Gene Expression	Transcription	RNA polymerase I promoter escape							2.0533	1.40916e-05	78
REACTOME_TRANSCRIPTIONAL_REGULATION_BY_THE_AP_2_TFAP2_FAMILY_OF_TRANSCRIPTION_FACTORS	Gene Expression	Transcription factor regulation	Transcriptional regulation by the AP-2 (TFAP2) family of transcription factors
REACTOME_FACTORS_INVOLVED_IN_MEGAKARYOCYTE_DEVELOPMENT_AND_PLATELET_PRODUCTION	Hematopoiesis	Megakaryocyte differentiation and platelet formation	Factors involved in megakaryocyte development and platelet production	-1.53925	0.00555584	151				-1.42734	0.0172263	150
REACTOME_MEGAKARYOCYTE_DEVELOPMENT_AND_PLATELET_PRODUCTION	Hematopoiesis	Megakaryocyte differentiation and platelet formation	Megakaryocyte development and platelet production
REACTOME_PLATELET_HOMEOSTASIS	Hemostasis	Hemostasis	Platelet homeostasis				-1.54527	0.0250087	77	-1.47967	0.0239149	76
REACTOME_FORMATION_OF_FIBRIN_CLOT_CLOTTING_CASCADE	Hemostasis	Hemostasis	Formation of fibrin clot (clotting cascade)							-1.80476	0.00440711	34
REACTOME_THROMBIN_SIGNALLING_THROUGH_PROTEINASE_ACTIVATED_RECEPTORS_PARS	Hemostasis	Platelet activation	Thrombin signalling through proteinase activated receptors (PARs)							-1.59482	0.0306373	30
REACTOME_BINDING_AND_UPTAKE_OF_LIGANDS_BY_SCAVENGER_RECEPTORS	Immune System	Innate Immune System	Binding and uptake of ligands by scavenger receptors	1.84399	0.0029532	37				-1.73527	0.00424149	36
REACTOME_TNF_SIGNALING	Immune System	Cytokine Signaling in Immune system	TNF signaling	1.61536	0.0218317	57				1.99468	0.000117515	57
REACTOME_CLASS_I_MHC_MEDIATED_ANTIGEN_PROCESSING_PRESENTATION	Immune System	Adaptive Immune System	Class I MHC mediated antigen processing and presentation	1.42202	0.00639079	365				1.68837	8.44366e-07	364
REACTOME_INTERFERON_SIGNALING	Immune System	Cytokine Signaling in Immune system	Interferon Signaling	-1.42906	0.0131645	175
REACTOME_MHC_CLASS_II_ANTIGEN_PRESENTATION	Immune System	Adaptive Immune System	MHC class II antigen presentation	-1.56935	0.0100351	113
REACTOME_ANTIVIRAL_MECHANISM_BY_IFN_STIMULATED_GENES	Immune System	Cytokine Signaling in Immune system	Antiviral mechanism by IFN stimulated genes	-1.97681	5.93319e-05	81				1.49366	0.0257361	81
REACTOME_INTERLEUKIN_2_FAMILY_SIGNALING	Immune System	Cytokine Signaling in Immune system	Interleukin 2 Family Signaling				-2.12384	0.000419646	37	-1.8158	0.00310604	38
REACTOME_FCGR3A_MEDIATED_IL10_SYNTHESIS	Immune System	Cytokine Signaling in Immune system	FCGR3A mediated IL10 synthesis				-1.89159	0.00385328	32	-1.92953	0.000898062	32
REACTOME_INTERLEUKIN_3_INTERLEUKIN_5_AND_GM_CSF_SIGNALING	Immune System	Cytokine Signaling in Immune system	Interleukin-3				-1.8888	0.00286561	43
REACTOME_CELL_SURFACE_INTERACTIONS_AT_THE_VASCULAR_WALL	Immune System	Cellular interactions	Cell surface interactions at the vascular wall				-1.72535	0.00114168	121	-2.02814	2.44761e-06	118
REACTOME_INTERLEUKIN_7_SIGNALING	Immune System	Cytokine Signaling in Immune system	Interleukin 7 Signaling				-1.71523	0.0145492	36
REACTOME_TOLL_LIKE_RECEPTOR_TLR1_TLR2_CASCADE	Immune System	Innate Immune System	Toll Like Receptor TLR1:Tlr2 Cascade				-1.58127	0.00726496	107	1.41914	0.0225776	107
REACTOME_TOLL_LIKE_RECEPTOR_CASCADES	Immune System	Innate Immune System	Toll Like Receptor Cascades				-1.57801	0.0051379	151
REACTOME_INTERLEUKIN_4_AND_INTERLEUKIN_13_SIGNALING	Immune System	Cytokine Signaling in Immune system	Interleukin 4 and Interleukin 13 Signaling				-1.46511	0.0374821	96
REACTOME_TOLL_LIKE_RECEPTOR_9_TLR9_CASCADE	Immune System	Innate Immune System	Toll Like Receptor 9 (TLR9) Cascade				-1.38745	0.0495041	101	1.5046	0.0162926	101
REACTOME_SIGNALING_BY_INTERLEUKINS	Immune System	Cytokine Signaling in Immune system	Signaling by interleukins				-1.26626	0.035139	421	1.31035	0.0101387	422
REACTOME_C_TYPE_LECTIN_RECEPTORS_CLRS	Immune System	Innate Immune System	C-type lectin receptors (CLRs)				1.44024	0.0216398	127	1.59898	0.00281338	127
REACTOME_ANTIGEN_PROCESSING_CROSS_PRESENTATION	Immune System	Adaptive Immune System	Antigen processing - cross presentation				1.48444	0.0243807	100	1.45108	0.0238986	101
REACTOME_SIGNALING_BY_THE_B_CELL_RECEPTOR_BCR	Immune System	Adaptive Immune System	Signaling by the B cell receptor (BCR)				1.50016	0.0163173	107	1.48422	0.0111544	107
REACTOME_INTERLEUKIN_1_SIGNALING	Immune System	Cytokine Signaling in Immune system	Interleukin 1 Signaling				1.50741	0.0124784	109	2.02197	4.21278e-06	109
REACTOME_TCR_SIGNALING	Immune System	Adaptive Immune System	T cell receptor (TCR) signaling				1.69722	0.00276942	100	1.79652	0.000538837	101
REACTOME_CLEC7A_DECTIN_1_SIGNALING	Immune System	Innate Immune System	CLEC7A (Dectin-1) signaling				1.83909	0.000407911	97	1.94853	1.83115e-05	97
REACTOME_FCERI_MEDIATED_NF_KB_ACTIVATION	Immune System	Innate Immune System	FCERI mediated NF-kB activation				2.0519	5.12396e-05	78	2.1618	1.82214e-06	78
REACTOME_DOWNSTREAM_SIGNALING_EVENTS_OF_B_CELL_RECEPTOR_BCR	Immune System	Adaptive Immune System	Downstream signaling events of B Cell Receptor (BCR)				2.06946	3.87155e-05	79	1.82657	0.000675062	79
REACTOME_CROSS_PRESENTATION_OF_SOLUBLE_EXOGENOUS_ANTIGENS_ENDOSOMES	Immune System	Adaptive Immune System	Cross presentation of soluble exogenous antigens via endosomes				2.27532	4.69864e-06	47	2.06716	0.000101337	47
REACTOME_DECTIN_1_MEDIATED_NONCANONICAL_NF_KB_SIGNALING	Immune System	Innate Immune System	Dectin-1 mediated noncanonical NF-kB signaling				2.44066	9.14731e-08	60	2.38332	5.67193e-08	60
REACTOME_COMPLEMENT_CASCADE	Immune System	Innate Immune System	Complement cascade							-1.98462	0.000444796	38
REACTOME_DAP12_INTERACTIONS	Immune System	Innate Immune System	DAP12 interactions							-1.91591	0.000731682	33
REACTOME_ANTI_INFLAMMATORY_RESPONSE_FAVOURING_LEISHMANIA_PARASITE_INFECTION	Immune System	Adaptive Immune System	Anti-inflammatory response favouring Leishmania parasite infection							-1.76707	0.00160519	64
REACTOME_FCGAMMA_RECEPTOR_FCGR_DEPENDENT_PHAGOCYTOSIS	Immune System	Innate Immune System	FCgamma receptor (FCGR) dependent phagocytosis							-1.58484	0.0108485	82
REACTOME_ADORA2B_MEDIATED_ANTI_INFLAMMATORY_CYTOKINES_PRODUCTION	Immune System	Cytokine Signaling in Immune system	Adora2b mediated anti-inflammatory cytokines production							-1.53706	0.0378982	39
REACTOME_NEUTROPHIL_DEGRANULATION	Immune System	Innate Immune System	Neutrophil degranulation							-1.28776	0.0244869	423
REACTOME_FC_EPSILON_RECEPTOR_FCERI_SIGNALING	Immune System	Innate Immune System	FC epsilon receptor (FCERI) signaling							1.36087	0.0284665	126
REACTOME_NOD1_2_SIGNALING_PATHWAY	Immune System	Innate Immune System	NOD1/2 Signaling pathway							1.53403	0.0264197	36
REACTOME_MYD88_INDEPENDENT_TLR4_CASCADE	Immune System	Innate Immune System	MYD88-independent TLR4 cascade							1.56623	0.00634836	104
REACTOME_GENE_AND_PROTEIN_EXPRESSION_BY_JAK_STAT_SIGNALING_AFTER_INTERLEUKIN_12_STIMULATION	Immune System	Cytokine Signaling in Immune system	Gene and protein expression by JAK-STAT signaling after interleukin-12 stimulation							1.58403	0.0207762	35
REACTOME_INTERLEUKIN_17_SIGNALING	Immune System	Cytokine Signaling in Immune system	Interleukin 17 Signaling							1.60006	0.0144337	67
REACTOME_DDX58_IFIH1_MEDIATED_INDUCTION_OF_INTERFERON_ALPHA_BETA	Immune System	Cytokine Signaling in Immune system	DDX58/IFIH1 mediated induction of interferon alpha/beta							1.61466	0.0111558	67
REACTOME_NUCLEOTIDE_BINDING_DOMAIN_LEUCINE_RICH_REPEAT_CONTAINING_RECEPTOR_NLR_SIGNALING_PATHWAYS	Immune System	Innate Immune System	Nucleotide-binding domain leucine rich repeat containing receptor (NLR) signaling pathways							1.71389	0.00653348	54
REACTOME_CYTOSOLIC_SENSORS_OF_PATHOGEN_ASSOCIATED_DNA	Immune System	Innate Immune System	Cytosolic sensors of pathogen-associated DNA							1.8346	0.00079004	61
REACTOME_INTERLEUKIN_1_FAMILY_SIGNALING	Immune System	Cytokine signaling in immune system	Interleukin-1 family signaling							1.92147	8.06747e-06	142
REACTOME_TNF_SIGNALING_PATHWAY	Immune System	Cytokine Signaling in Immune system	TNF signaling pathway
REACTOME_ENDOSOMAL_SORTING_COMPLEX_REQUIRED_FOR_TRANSPORT_ESCRT	Membrane Trafficking	ESCRT	Endosomal sorting complex required for transport (ESCRT)				1.60396	0.0474311	31	1.71847	0.00882632	31
REACTOME_SEALING_OF_THE_NUCLEAR_ENVELOPE_NE_BY_ESCRT_III	Membrane Trafficking	ESCRT	Sealing of the nuclear envelope (NE) by ESCRT III				1.61996	0.0426737	31
REACTOME_SELENOAMINO_ACID_METABOLISM	Metabolism	Metabolism of amino acids and derivatives	Selenoamino acid metabolism	2.49615	4.58702e-14	115	3.08855	6.00076e-23	115	3.06491	3.34337e-26	115
REACTOME_PEPTIDE_HORMONE_METABOLISM	Metabolism	Metabolism of amino acids and derivatives	Peptide hormone metabolism	1.8297	0.000858017	72				-1.68973	0.00348014	70
REACTOME_METABOLISM_OF_AMINO_ACIDS_AND_DERIVATIVES	Metabolism	Metabolism of amino acids and derivatives	Metabolism of amino acids and derivatives	1.67507	2.95213e-05	349	2.3823	8.23545e-18	349	2.35403	3.37155e-19	347
REACTOME_METABOLISM_OF_CARBOHYDRATES	Metabolism	Metabolism of carbohydrates	Metabolism of carbohydrates	-1.44891	0.00270532	272				-1.26038	0.0423145	267
REACTOME_PROTEIN_FOLDING	Metabolism	Metabolism of proteins	Protein folding	-1.48586	0.0324271	92	1.95417	6.81532e-05	92
REACTOME_COOPERATION_OF_PREFOLDIN_AND_TRIC_CCT_IN_ACTIN_AND_TUBULIN_FOLDING	Metabolism	Metabolism of proteins	Cooperation of Prefoldin and TRiC/CCT in actin and tubulin folding	-1.60407	0.0450476	32	2.16317	7.5257e-05	32
REACTOME_HSP90_CHAPERONE_CYCLE_FOR_STEROID_HORMONE_RECEPTORS_SHR_IN_THE_PRESENCE_OF_LIGAND	Metabolism	Metabolism of proteins	HSP90 chaperone cycle for steroid hormone receptors (SHR) in the presence of ligand	-1.6518	0.0126428	55
REACTOME_GLUCOSE_METABOLISM	Metabolism	Metabolism of carbohydrates	Glucose metabolism	-1.91562	8.41692e-05	85	1.67691	0.00424345	83
REACTOME_GLYCOLYSIS	Metabolism	Metabolism of carbohydrates	Glycolysis	-2.04583	2.30537e-05	68	1.77655	0.00392257	67
REACTOME_REGULATION_OF_GLUCOKINASE_BY_GLUCOKINASE_REGULATORY_PROTEIN	Metabolism	Metabolism of carbohydrates	Regulation of glucokinase by glucokinase regulatory protein	-2.05532	0.000199549	32	1.79884	0.0070411	32	1.7114	0.00936561	32
REACTOME_CARBOXYTERMINAL_POST_TRANSLATIONAL_MODIFICATIONS_OF_TUBULIN	Metabolism	Post-translational protein modification	Carboxyterminal post translational modifications of tubulin	-2.1128	4.03354e-05	41
REACTOME_SYNTHESIS_OF_PIPS_AT_THE_PLASMA_MEMBRANE	Metabolism	Metabolism of lipids and lipoproteins	Synthesis of PIPs at the plasma membrane				-2.19875	9.9345e-06	51	-1.69865	0.00612517	50
REACTOME_ACTIVATION_OF_GENE_EXPRESSION_BY_SREBF_SREBP	Metabolism	Metabolism of lipids and lipoproteins	Activation of gene expression by SREBF (SREBP)				-2.0735	0.000174214	42	-2.01085	0.000200995	42
REACTOME_REGULATION_OF_CHOLESTEROL_BIOSYNTHESIS_BY_SREBP_SREBF	Metabolism	Metabolism of lipids and lipoproteins	Regulation of cholesterol biosynthesis by SREBP (SREBF)				-2.03857	0.000166692	55	-1.71927	0.00538165	55
REACTOME_PI_METABOLISM	Metabolism	Metabolism of lipids and lipoproteins	PI metabolism				-2.03156	7.14644e-05	78	-1.71889	0.00164261	77
REACTOME_PHOSPHOLIPID_METABOLISM	Metabolism	Metabolism of lipids and lipoproteins	Phospholipid metabolism				-1.88656	7.37179e-06	192	-1.82582	5.97546e-06	191
REACTOME_O_LINKED_GLYCOSYLATION_OF_MUCINS	Metabolism	Metabolism of proteins	O-linked glycosylation of mucins				-1.8554	0.00153334	56	-1.71603	0.00501597	56
REACTOME_METABOLISM_OF_FAT_SOLUBLE_VITAMINS	Metabolism	Metabolism of vitamins and cofactors	Metabolism of fat soluble vitamins				-1.80145	0.00815614	39	-1.97056	0.000526628	39
REACTOME_METABOLISM_OF_STEROIDS	Metabolism	Metabolism of lipids and lipoproteins	Metabolism of steroids				-1.74908	0.000204482	141	-1.99729	2.21354e-06	141
REACTOME_ION_TRANSPORT_BY_P_TYPE_ATPASES	Metabolism	Transport of small molecules	Ion transport by P-type ATPases				-1.73361	0.0132381	50	-2.1866	1.85554e-06	50
REACTOME_CYTOCHROME_P450_ARRANGED_BY_SUBSTRATE_TYPE	Metabolism	Xenobiotics	Cytochrome P450 arranged by substrate type				-1.71292	0.0138432	48	-1.75577	0.00319891	50
REACTOME_GLYCEROPHOSPHOLIPID_BIOSYNTHESIS	Metabolism	Metabolism of lipids and lipoproteins	Glycerophospholipid biosynthesis				-1.66002	0.00192339	115	-1.7418	0.000674929	115
REACTOME_ION_CHANNEL_TRANSPORT	Metabolism	Transport of small molecules	Ion channel transport				-1.62719	0.00178645	160	-1.87642	8.41176e-06	159
REACTOME_SYNTHESIS_OF_BILE_ACIDS_AND_BILE_SALTS	Metabolism	Metabolism of lipids and lipoproteins	Synthesis of bile acids and bile salts				-1.58697	0.0371044	32	-1.5377	0.039005	32
REACTOME_REGULATION_OF_LIPID_METABOLISM_BY_PPARALPHA	Metabolism	Metabolism of lipids and lipoproteins	Regulation of lipid metabolism by PPARalpha				-1.51121	0.0173006	110
REACTOME_MITOCHONDRIAL_FATTY_ACID_BETA_OXIDATION	Metabolism	Metabolism of lipids and lipoproteins	Mitochondrial fatty acid beta-oxidation				1.53155	0.0487597	36
REACTOME_PROTEIN_LOCALIZATION	Metabolism	Metabolism of proteins	Protein localization				2.10101	6.80622e-08	158	1.87639	1.15321e-05	158
REACTOME_METABOLISM_OF_NUCLEOTIDES	Metabolism	Metabolism of nucleotides	Metabolism of nucleotides				2.25189	1.53347e-07	93	1.72225	0.0013346	93
REACTOME_TRNA_MODIFICATION_IN_THE_NUCLEUS_AND_CYTOSOL	Metabolism	Metabolism of RNA	tRNA modification in the nucleus and cytosol				2.30186	5.97145e-06	43	2.3675	1.46677e-07	43
REACTOME_THE_CITRIC_ACID_TCA_CYCLE_AND_RESPIRATORY_ELECTRON_TRANSPORT	Metabolism	Energy metabolism	The citric acid (TCA) cycle and respiratory electron transport				2.52465	1.62274e-14	175	1.54799	0.00180782	175
REACTOME_COMPLEX_I_BIOGENESIS	Metabolism	Energy metabolism	Complex I biogenesis				2.56021	9.16049e-09	57
REACTOME_METABOLISM_OF_POLYAMINES	Metabolism	Metabolism of amino acids and derivatives	Metabolism of polyamines				2.58882	2.63741e-09	56	2.32536	3.37275e-07	56
REACTOME_RESPIRATORY_ELECTRON_TRANSPORT	Metabolism	Energy metabolism	Respiratory electron transport				2.74533	8.65736e-15	103	1.79244	0.000476468	103
REACTOME_RESPIRATORY_ELECTRON_TRANSPORT_ATP_SYNTHESIS_BY_CHEMIOSMOTIC_COUPLING_AND_HEAT_PRODUCTION_BY_UNCOUPLING_PROTEINS	Metabolism	Energy metabolism	Respiratory electron transport ATP synthesis by chemiosmotic coupling and heat production by uncoupling proteins				2.83079	1.21291e-17	126	1.86153	2.66756e-05	126
REACTOME_MITOCHONDRIAL_TRANSLATION	Metabolism	Metabolism of proteins	Mitochondrial Translation				3.30144	3.67811e-27	94	2.61238	1.13663e-12	94
REACTOME_O_GLYCOSYLATION_OF_TSR_DOMAIN_CONTAINING_PROTEINS	Metabolism	Metabolism of proteins	O glycosylation of TSR domain containing proteins							-1.95221	0.000674929	32
REACTOME_FATTY_ACYL_COA_BIOSYNTHESIS	Metabolism	Metabolism of lipids and lipoproteins	Fatty acyl CoA biosynthesis							-1.9218	0.000499505	36
REACTOME_INTEGRATION_OF_ENERGY_METABOLISM	Metabolism	Energy metabolism	Integration of energy metabolism							-1.74844	0.000778433	99
REACTOME_FATTY_ACID_METABOLISM	Metabolism	Metabolism of lipids and lipoproteins	Fatty acid metabolism							-1.67106	0.000525554	160
REACTOME_INOSITOL_PHOSPHATE_METABOLISM	Metabolism	Metabolism of lipids and lipoproteins	Inositol phosphate metabolism							-1.64599	0.00846034	47
REACTOME_AQUAPORIN_MEDIATED_TRANSPORT	Metabolism	Transport of small molecules	Aquaporin mediated transport							-1.55681	0.0278877	43
REACTOME_POTASSIUM_CHANNELS	Metabolism	Transport of small molecules	Potassium channels							-1.54802	0.0133817	84
REACTOME_METABOLISM_OF_VITAMINS_AND_COFACTORS	Metabolism	Metabolism of vitamins and cofactors	Metabolism of vitamins and cofactors							-1.53613	0.00301912	173
REACTOME_ARACHIDONIC_ACID_METABOLISM	Metabolism	Metabolism of lipids and lipoproteins	Arachidonic acid metabolism							-1.52695	0.0378982	48
REACTOME_PHASE_I_FUNCTIONALIZATION_OF_COMPOUNDS	Metabolism	Xenobiotics	Phase I functionalization of compounds							-1.52284	0.0207582	81
REACTOME_DETOXIFICATION_OF_REACTIVE_OXYGEN_SPECIES	Metabolism	Detoxification	Detoxification of reactive oxygen species							-1.48023	0.0473539	31
REACTOME_BILE_ACID_AND_BILE_SALT_METABOLISM	Metabolism	Metabolism of lipids and lipoproteins	Bile acid and bile salt metabolism							-1.47044	0.0394164	42
REACTOME_ABC_FAMILY_PROTEINS_MEDIATED_TRANSPORT	Metabolism	Transport of small molecules	ABC family proteins mediated transport							1.33359	0.0435464	99
REACTOME_NUCLEOTIDE_CATABOLISM	Metabolism	Metabolism of nucleotides	Nucleotide catabolism							1.53916	0.0334195	31
REACTOME_ASSOCIATION_OF_TRIC_CCT_WITH_TARGET_PROTEINS_DURING_BIOSYNTHESIS	Metabolism	Metabolism of proteins	Association of TRiC/CCT with target proteins during biosynthesis							1.54773	0.0241578	36
REACTOME_CITRIC_ACID_CYCLE_TCA_CYCLE	Metabolism	Energy metabolism	Citric acid cycle (TCA cycle)
REACTOME_KERATAN_SULFATE_KERATIN_METABOLISM	Metabolism of carbohydrates	Glycosaminoglycan metabolism	Keratan sulfate / keratin metabolism				-1.79006	0.00793716	31
REACTOME_GLYCOSAMINOGLYCAN_METABOLISM	Metabolism of carbohydrates	Glycosaminoglycan metabolism	Glycosaminoglycan metabolism				-1.76947	0.000554522	113	-1.922	1.38364e-05	112
REACTOME_SIALIC_ACID_METABOLISM	Metabolism of carbohydrates	Glycosaminoglycan metabolism	Sialic acid metabolism				-1.76945	0.00906837	31
REACTOME_CHONDROITIN_SULFATE_DERMATAN_SULFATE_METABOLISM	Metabolism of carbohydrates	Glycosaminoglycan metabolism	Chondroitin sulfate / Dermatan sulfate metabolism							-2.00425	0.000251166	48
REACTOME_HEPARAN_SULFATE_HEPARIN_HS_GAG_METABOLISM	Metabolism of carbohydrates	Glycosaminoglycan metabolism	Heparan sulfate / heparin (HS) GAG metabolism							-1.92075	0.000761852	48
REACTOME_UNFOLDED_PROTEIN_RESPONSE_UPR	Metabolism of proteins	Unfolded Protein Response	Unfolded Protein Response (UPR)	2.65233	1.49108e-16	91				1.4872	0.0111544	91
REACTOME_SRP_DEPENDENT_COTRANSLATIONAL_PROTEIN_TARGETING_TO_MEMBRANE	Metabolism of proteins	Protein targeting and translocation	SRP-dependent cotranslational protein targeting to membrane	2.64211	9.94415e-18	111	3.31192	2.37198e-28	111	3.15242	1.32279e-29	111
REACTOME_RESPONSE_OF_EIF2AK4_GCN2_TO_AMINO_ACID_DEFICIENCY	Metabolism of proteins	Translation regulation	Response of EIF2AK4 (GCN2) to amino acid deficiency	2.58328	7.38942e-16	100	3.21962	4.53332e-25	100	3.24453	1.55206e-30	100
REACTOME_EUKARYOTIC_TRANSLATION_ELONGATION	Metabolism of proteins	Translation	Eukaryotic Translation Elongation	2.52397	9.27575e-14	92	3.61406	1.08021e-38	92	3.25689	2.07356e-30	92
REACTOME_EUKARYOTIC_TRANSLATION_INITIATION	Metabolism of proteins	Translation	Eukaryotic Translation Initiation	2.4016	4.82375e-12	118	3.49253	1.77588e-36	118	3.2936	1.35568e-36	118
REACTOME_ASPARAGINE_N_LINKED_GLYCOSYLATION	Metabolism of proteins	Post-translational protein modification	Asparagine N-linked glycosylation	2.27631	9.3257e-16	295				1.42106	0.00340073	294
REACTOME_N_GLYCAN_TRIMMING_IN_THE_ER_AND_CALNEXIN_CALRETICULIN_CYCLE	Metabolism of proteins	Post-translational protein modification	N-glycan trimming in the ER and calnexin/calreticulin cycle	2.22039	3.92684e-06	35
REACTOME_TRANSLATION	Metabolism of proteins	Translation	Translation	2.15079	2.05162e-12	291	3.45174	1.32197e-54	291	3.22939	4.08145e-53	291
REACTOME_ACTIVATION_OF_THE_MRNA_UPON_BINDING_OF_THE_CAP_BINDING_COMPLEX_AND_EIFS_AND_SUBSEQUENT_BINDING_TO_43S	Metabolism of proteins	Translation	Activation of the mRNA upon binding of the CAP-binding complex and elFs and subsequent binding to 43S	2.05195	6.56949e-05	59	3.02581	1.20827e-15	59	2.87003	2.92994e-16	59
REACTOME_TRNA_AMINOACYLATION	Metabolism of proteins	Translation	tRNA aminoacylation	1.98938	0.000297729	42				2.01858	0.000170334	42
REACTOME_BIOSYNTHESIS_OF_THE_N_GLYCAN_PRECURSOR_DOLICHOL_LIPID_LINKED_OLIGOSACCHARIDE_LLO_AND_TRANSFER_TO_A_NASCENT_PROTEIN	Metabolism of proteins	Post-translational protein modification	Biosynthesis of the N-glycan precursor dolichol lipid-linked oligosaccharide (LLO) and transfer to a nascent protein	1.8407	0.00107023	75
REACTOME_SYNTHESIS_OF_SUBSTRATES_IN_N_GLYCAN_BIOSYTHESIS	Metabolism of proteins	Post-translational protein modification	Synthesis of substrates in N-glycan biosynthesis	1.80561	0.0018817	60
REACTOME_TRNA_PROCESSING	Metabolism of proteins	RNA processing	tRNA processing	-1.61035	0.00309103	108	2.53294	6.45646e-12	108	2.61287	4.45555e-14	108
REACTOME_TRNA_PROCESSING_IN_THE_NUCLEUS	Metabolism of proteins	RNA processing	tRNA processing in the nucleus	-1.89946	0.000326706	58	2.22033	9.32506e-06	58	2.26609	1.0244e-06	58
REACTOME_O_LINKED_GLYCOSYLATION	Metabolism of proteins	Post-translational protein modification	O-linked glycosylation				-1.73091	0.00174553	98	-1.97244	1.30845e-05	98
REACTOME_MUSCLE_CONTRACTION	Muscle contraction	Muscle contraction	Muscle contraction							-1.90202	4.21278e-06	177
REACTOME_SMOOTH_MUSCLE_CONTRACTION	Muscle contraction	Muscle contraction	Smooth muscle contraction							-1.83194	0.00269336	39
REACTOME_SENSORY_PERCEPTION	Nervous System	Nervous System	Sensory perception							-1.90544	1.72314e-06	197
REACTOME_VISUAL_PHOTOTRANSDUCTION	Nervous System	Sensory System	Visual phototransduction				-1.61597	0.0154527	78	-1.93932	0.00016865	79
REACTOME_CARDIAC_CONDUCTION	Nervous System	Cardiovascular signaling	Cardiac conduction				-1.52784	0.0103242	115	-1.89489	4.98082e-05	114
REACTOME_SENSORY_PROCESSING_OF_SOUND_BY_OUTER_HAIR_CELLS_OF_THE_COCHLEA	Nervous System	Sensory System	Sensory processing of sound by outer hair cells of the cochlea							-1.63712	0.00884914	47
REACTOME_SENSORY_PROCESSING_OF_SOUND	Nervous System	Sensory System	Sensory processing of sound							-1.50345	0.0218155	67
REACTOME_NEURONAL_SYSTEM	Neuronal System	Neuronal System	Neuronal System	-1.44743	0.00161299	348	-1.54598	0.000684722	339	-1.94042	2.19297e-09	339
REACTOME_TRANSMISSION_ACROSS_CHEMICAL_SYNAPSES	Neuronal System	Synaptic transmission	Transmission across chemical synapses	-1.39571	0.0126428	234	-1.37198	0.0245989	228	-1.92288	1.78624e-07	228
REACTOME_GABA_B_RECEPTOR_ACTIVATION	Neuronal System	Synaptic transmission	GABA B receptor activation	-1.63803	0.0267686	40				-1.57566	0.0284659	39
REACTOME_GABA_RECEPTOR_ACTIVATION	Neuronal System	Synaptic transmission	GABA receptor activation	-1.65319	0.0145904	48				-1.64763	0.00835432	47
REACTOME_NEUROTRANSMITTER_RECEPTORS_AND_POSTSYNAPTIC_SIGNAL_TRANSMISSION	Neuronal System	Synaptic transmission	Neurotransmitter receptors and postsynaptic signal transmission	-1.65748	0.000905116	176				-1.90297	2.04255e-06	174
REACTOME_ASSEMBLY_AND_CELL_SURFACE_PRESENTATION_OF_NMDA_RECEPTORS	Neuronal System	Synaptic transmission	Assembly and cell surface presentation of NMDA receptors	-1.66343	0.0162039	42				-1.52266	0.0269143	42
REACTOME_RHO_GTPASES_ACTIVATE_IQGAPS	Neuronal System	Small GTPase signaling	Rho GTPases activate IQGAPs	-1.70279	0.0185018	31				-1.48798	0.0431945	31
REACTOME_GAP_JUNCTION_TRAFFICKING_AND_REGULATION	Neuronal System	Gap junctions	Gap junction trafficking and regulation	-1.787	0.00470988	45
REACTOME_NCAM_SIGNALING_FOR_NEURITE_OUT_GROWTH	Neuronal System	Cell adhesion molecules	NCAM signaling for neurite out growth				-1.70469	0.0118386	59	-1.97851	0.000158671	60
REACTOME_RET_SIGNALING	Neuronal System	Receptor tyrosine kinase signaling	RET signaling				-1.69584	0.0214632	38	-1.94988	0.000387361	37
REACTOME_CDC42_GTPASE_CYCLE	Neuronal System	Small GTPase signaling	CDC42 GTPase cycle				-1.69017	0.00105576	151	-1.47814	0.0118467	151
REACTOME_NEUROTRANSMITTER_RELEASE_CYCLE	Neuronal System	Synaptic transmission	Neurotransmitter release cycle				-1.68153	0.0159993	42
REACTOME_NCAM1_INTERACTIONS	Neuronal System	Cell adhesion molecules	NCAM1 interactions				-1.64168	0.0245362	39	-1.93978	0.000571897	40
REACTOME_RAC1_GTPASE_CYCLE	Neuronal System	Small GTPase signaling	RAC1 GTPase cycle				-1.59923	0.0023235	177	-1.44781	0.0116139	177
REACTOME_ACTIVATION_OF_NMDA_RECEPTORS_AND_POSTSYNAPTIC_EVENTS	Neuronal System	Synaptic transmission	Activation of NMDA receptors and postsynaptic events							-1.7352	0.000841287	87
REACTOME_RAC3_GTPASE_CYCLE	Neuronal System	Small GTPase signaling	RAC3 GTPase cycle							-1.42924	0.0232475	91
REACTOME_CELL_DEATH_SIGNALLING_VIA_NRAGE_NRIF_AND_NADE	NRIF and NADE	NRIF and NADE	Cell death signalling via NRAGE							-1.41735	0.0334195	75
REACTOME_ORGANELLE_BIOGENESIS_AND_MAINTENANCE	Organelle biogenesis and maintenance	Organelle biogenesis and maintenance	Organelle biogenesis and maintenance	-1.42865	0.00270532	285	1.30705	0.0243973	285
REACTOME_AUTOPHAGY	Organelle biogenesis and maintenance	Autophagy	Autophagy	1.50855	0.0175636	148				1.76545	0.000126051	148
REACTOME_AGGREPHAGY	Organelle Biogenesis and Maintenance	Autophagy	Aggrephagy	-1.60095	0.0264242	42	1.60883	0.024138	42
REACTOME_CILIUM_ASSEMBLY	Organelle biogenesis and maintenance	Cilium assembly	Cilium assembly	-1.67917	0.00010607	192
REACTOME_ANCHORING_OF_THE_BASAL_BODY_TO_THE_PLASMA_MEMBRANE	Organelle biogenesis and maintenance	Cilium assembly	Anchoring of the basal body to the plasma membrane	-2.04263	4.41501e-06	96
REACTOME_KINESINS	Organelle Biogenesis and Maintenance	Cytoskeleton dynamics	Kinesins	-2.36637	4.36092e-08	59
REACTOME_MITOCHONDRIAL_BIOGENESIS	Organelle biogenesis and maintenance	Mitochondrial biogenesis	Mitochondrial biogenesis				1.54807	0.0149021	93
REACTOME_SELECTIVE_AUTOPHAGY	Organelle Biogenesis and Maintenance	Autophagy	Selective autophagy				1.59111	0.0146355	79	1.59977	0.00798904	79
REACTOME_CRISTAE_FORMATION	Organelle biogenesis and maintenance	Mitochondrial biogenesis	Crista formation				2.38381	3.62036e-06	31	1.93856	0.000979813	31
REACTOME_MITOCHONDRIAL_PROTEIN_IMPORT	Organelle biogenesis and maintenance	Mitochondrial biogenesis	Mitochondrial protein import				2.71321	3.5337e-11	63	2.23264	1.74414e-06	63
REACTOME_INTRAFLAGELLAR_TRANSPORT	Organelle Biogenesis and Maintenance	Cilium assembly	Intraflagellar transport							-1.54552	0.0338948	48
REACTOME_LATE_ENDOSOMAL_MICROAUTOPHAGY	Organelle Biogenesis and Maintenance	Autophagy	Late endosomal microautophagy							1.9436	0.000651031	33
REACTOME_SUMOYLATION_OF_RNA_BINDING_PROTEINS	Post-translational modification	Sumoylation	Sumoylation of RNA binding proteins	-1.75951	0.0038589	47	1.80186	0.00421516	47	1.75004	0.00419589	47
REACTOME_SUMOYLATION_OF_DNA_DAMAGE_RESPONSE_AND_REPAIR_PROTEINS	Post-translational modification	Sumoylation	Sumoylation of DNA damage response and repair proteins	-1.79471	0.0016166	76				1.72956	0.00311395	76
REACTOME_SUMOYLATION	Post-translational modification	Sumoylation	Sumoylation	-1.8391	1.14635e-05	181				1.49782	0.00330925	179
REACTOME_SUMOYLATION_OF_CHROMATIN_ORGANIZATION_PROTEINS	Post-translational modification	Sumoylation	Sumoylation of chromatin organization proteins	-1.90748	0.000271645	68				1.48974	0.0369531	67
REACTOME_SUMOYLATION_OF_UBIQUITINYLATION_PROTEINS	Post-translational modification	Sumoylation	Sumoylation of ubiquitinylation proteins	-1.92835	0.0010604	39	1.54006	0.0463424	39	1.78872	0.00603355	39
REACTOME_SUMOYLATION_OF_SUMOYLATION_PROTEINS	Post-translational modification	Sumoylation	Sumoylation of sumoylation proteins	-2.13718	1.84141e-05	35	1.77912	0.0134991	35	1.6934	0.00852575	35
REACTOME_SUMOYLATION_OF_DNA_REPLICATION_PROTEINS	Post-translational protein modification	SUMOylation	Sumoylation of DNA replication proteins	-2.28447	5.41879e-07	46	1.98747	0.000414759	46	1.90175	0.000969839	46
REACTOME_DEUBIQUITINATION	Post-translational protein modification	Deubiquitination	Deubiquitination				1.32053	0.031365	264	2.02194	1.68913e-09	264
REACTOME_UB_SPECIFIC_PROCESSING_PROTEASES	Post-translational protein modification	Ubiquitin processing	UB specific processing proteases				1.43288	0.0123412	187	2.03014	4.96044e-08	187
REACTOME_SYNTHESIS_OF_ACTIVE_UBIQUITIN_ROLES_OF_E1_AND_E2_ENZYMES	Post-translational protein modification	Ubiquitination	Synthesis of active ubiquitin: Roles of E1 and E2 enzymes				1.55536	0.0355621	30	1.73246	0.00653348	30
REACTOME_NEDDYLATION	Post-translational protein modification	Neddylation	Neddylation				1.57555	0.000341543	236	1.93836	9.57469e-08	235
REACTOME_UCH_PROTEINASES	Post-translational protein modification	Deubiquitination	UCH proteinases				2.13761	3.32627e-06	96	2.16505	4.26996e-07	96
REACTOME_SUMOYLATION_OF_TRANSCRIPTION_COFACTORS	Post-translational protein modification	SUMOylation	Sumoylation of transcription cofactors							1.45322	0.0438915	43
REACTOME_METALLOPROTEASE_DUBS	Post-translational protein modification	Deubiquitination	Metalloprotease DUBs							1.61318	0.0168699	33
REACTOME_E3_UBIQUITIN_LIGASES_UBIQUITINATE_TARGET_PROTEINS	Post-translational protein modification	Ubiquitination	E3 ubiquitin ligases ubiquitinate target proteins							1.86319	0.00116081	56
REACTOME_PROTEIN_UBIQUITINATION	Post-translational protein modification	Ubiquitination	Protein ubiquitination							1.95672	0.000147007	76
REACTOME_PROGRAMMED_CELL_DEATH	Programmed Cell Death	Programmed Cell Death	Programmed Cell Death				1.57169	0.0016451	203	1.49538	0.00286083	202
REACTOME_NRAGE_SIGNALS_DEATH_THROUGH_JNK	Programmed Cell Death	Apoptosis	NRAGE signals death through JNK				-1.56138	0.0392791	58	-1.7894	0.00168287	58
REACTOME_APOPTOSIS	Programmed Cell Death	Apoptosis	Apoptosis				1.66802	0.000503273	172	1.43082	0.0108485	171
REACTOME_DEATH_RECEPTOR_SIGNALING	Programmed Cell Death	Extrinsic apoptosis pathway	Death receptor signaling							1.33802	0.0300793	152
	Programmed Cell Death	Extrinsic apoptosis pathway	Death receptor signaling							1.33802	0.0300793	152
REACTOME_REGULATED_NECROSIS	Programmed Cell Death	Necroptosis	Regulated necrosis							1.64506	0.0112315	56
	Programmed Cell Death	Necroptosis	Regulated necrosis							1.64506	0.0112315	56
REACTOME_RIPK1_MEDIATED_REGULATED_NECROSIS	Programmed Cell Death	Necrosis	RIPK1 mediated regulated necrosis							1.80157	0.00323519	30
	Programmed Cell Death	Necrosis	RIPK1 mediated regulated necrosis							1.80157	0.00323519	30
REACTOME_REPRODUCTION	Reproduction	Reproduction	Reproduction	-1.85076	6.95128e-05	122				1.71907	0.000519788	121
REACTOME_REGULATION_OF_INSULIN_LIKE_GROWTH_FACTOR_IGF_TRANSPORT_AND_UPTAKE_BY_INSULIN_LIKE_GROWTH_FACTOR_BINDING_PROTEINS_IGFBPS	Signal Transduction	Insulin signaling	Regulation of insulin like growth factor (IGF) transport and uptake by insulin like growth factor binding proteins (IGFBPs)	1.76845	0.00058656	110				-2.08946	1.0244e-06	107
REACTOME_TNFR1_INDUCED_NFKAPPAB_SIGNALING_PATHWAY	Signal Transduction	Signaling by TNF	TNFR1 induced NF-kappaB signaling pathway	1.69669	0.0174645	33				2.09973	7.80289e-05	33
REACTOME_HEDGEHOG_LIGAND_BIOGENESIS	Signal Transduction	Signaling by Hedgehog	Hedgehog ligand biogenesis	1.68288	0.0130783	63	2.19966	7.04369e-06	63	1.64941	0.00852575	63
REACTOME_RAB_REGULATION_OF_TRAFFICKING	Signal Transduction	Small GTPase signaling	Rab regulation of trafficking	1.64131	0.00394031	120
REACTOME_RAB_GEFS_EXCHANGE_GTP_FOR_GDP_ON_RABS	Signal Transduction	Small GTPase signaling	Rab GEFs exchange GTP for GDP on Rabs	1.60627	0.0108164	89
REACTOME_EGFR_DOWNREGULATION	Signal Transduction	Signaling by Receptor Tyrosine Kinases	EGFR downregulation	1.5964	0.0402267	31
REACTOME_SIGNALING_BY_EGFR	Signal Transduction	Signaling by Receptor Tyrosine Kinases	Signaling by EGFR	1.54671	0.0492277	50
REACTOME_SIGNALING_BY_ROBO_RECEPTORS	Signal Transduction	Axon guidance	Signaling by ROBO receptors	1.46239	0.0120045	212	2.85129	2.30046e-23	212	2.63242	1.82517e-20	212
REACTOME_SIGNALING_BY_WNT	Signal Transduction	Signaling by WNT	Signaling by WNT	-1.38023	0.0111174	311
REACTOME_G_ALPHA_S_SIGNALLING_EVENTS	Signal Transduction	G protein signaling	G alpha s signalling events	-1.40555	0.0495646	111	-1.57509	0.0145492	111	-1.68939	0.000805318	113
REACTOME_TCF_DEPENDENT_SIGNALING_IN_RESPONSE_TO_WNT	Signal Transduction	Signaling by WNT	TCF dependent signaling in response to WNT	-1.42852	0.00478782	215				1.49042	0.00260964	214
REACTOME_SIGNALING_BY_FGFR	Signal Transduction	Signaling by Receptor Tyrosine Kinases	Signaling by FGFR	-1.47541	0.0427621	79
REACTOME_RHOB_GTPASE_CYCLE	Signal Transduction	Signaling by Rho GTPases	RhoB GTPase cycle	-1.48361	0.0450476	70
REACTOME_RHOC_GTPASE_CYCLE	Signal Transduction	Signaling by Rho GTPases	RhoC GTPase cycle	-1.48868	0.0492277	74
REACTOME_HEDGEHOG_OFF_STATE	Signal Transduction	Signaling by Hedgehog	Hedgehog off state	-1.5221	0.0109468	108	1.58992	0.00880191	108
REACTOME_CA_DEPENDENT_EVENTS	Signal Transduction	Ca2+ signalling pathway	Ca2+ dependent events	-1.80427	0.00242572	35				-1.8997	0.00107699	35
REACTOME_G_PROTEIN_MEDIATED_EVENTS	Signal Transduction	G protein signaling	G protein mediated events	-1.88668	0.0011792	51				-1.8039	0.0015651	51
REACTOME_OPIOID_SIGNALLING	Signal Transduction	Neurotransmitter receptor signaling	Opioid signaling	-1.95538	4.29586e-05	84				-1.61144	0.00767777	83
REACTOME_RHO_GTPASE_EFFECTORS	Signal Transduction	Signaling by Rho GTPases	Rho GTPase effectors	-2.19594	6.82229e-15	309	1.6025	0.000273418	308	1.27366	0.0246066	307
REACTOME_RHO_GTPASES_ACTIVATE_FORMINS	Signal Transduction	Signaling by Rho GTPases	Rho GTPases activate Formins	-2.46045	9.68154e-14	138	2.27492	1.73204e-09	138	1.65207	0.000994255	138
REACTOME_HEME_SIGNALING	Signal Transduction	Signaling by nuclear receptors	Heme signaling				-1.9886	0.00108298	45
REACTOME_SIGNALING_BY_SCF_KIT	Signal Transduction	Signaling by SCF-KIT	Signaling by SCF-KIT				-1.80927	0.0049843	40
REACTOME_NR1H2_AND_NR1H3_MEDIATED_SIGNALING	Signal Transduction	Nuclear receptor signaling	NR1H2 and NR1H3 mediated signaling				-1.73297	0.0157924	43
REACTOME_NETRIN_1_SIGNALING	Signal Transduction	Axon guidance	Netrin-1 signaling				-1.72336	0.00824979	46	-1.64859	0.00904056	45
REACTOME_FLT3_SIGNALING	Signal Transduction	Signaling by Receptor Tyrosine Kinases	FLT3 signaling				-1.70941	0.0185779	37
REACTOME_CONSTITUTIVE_SIGNALING_BY_ABERRANT_PI3K_IN_CANCER	Signal Transduction	PI3K/AKT signaling	Constitutive signaling by aberrant PI3K in cancer				-1.70504	0.00593995	63	-1.51658	0.0241578	64
REACTOME_PI3K_AKT_SIGNALING_IN_CANCER	Signal Transduction	PI3K/AKT signaling	PI3K/AKT signaling in cancer				-1.67791	0.00760613	90
REACTOME_NEGATIVE_REGULATION_OF_THE_PI3K_AKT_NETWORK	Signal Transduction	PI3K/AKT signaling	Negative regulation of the PI3K/AKT network				-1.66459	0.0049843	96
REACTOME_INSULIN_RECEPTOR_SIGNALLING_CASCADE	Signal Transduction	Insulin signaling	Insulin receptor signalling cascade				-1.63214	0.0168791	46	-1.6592	0.00887128	46
REACTOME_SIGNALING_BY_INSULIN_RECEPTOR	Signal Transduction	Insulin signaling	Signaling by Insulin Receptor				-1.59957	0.0143675	73	-1.77214	0.00122063	73
REACTOME_CLASS_B_2_SECRETIN_FAMILY_RECEPTORS	Signal Transduction	G protein signaling	Class B/2 Secretin family receptors				-1.55907	0.022679	77	-1.56782	0.0111633	77
REACTOME_ONCOGENIC_MAPK_SIGNALING	Signal Transduction	MAPK family signaling cascades	Oncogenic MAPK signaling				-1.54953	0.0229187	81
REACTOME_SIGNALING_BY_RECEPTOR_TYROSINE_KINASES	Signal Transduction	Signaling by Receptor Tyrosine Kinases	Signaling by Receptor Tyrosine Kinases				-1.53972	0.000139863	489	-1.52468	0.000111364	490
REACTOME_SIGNALING_BY_PDGF	Signal Transduction	Signaling by PDGF	Signaling by PDGF				-1.53096	0.0410497	56	-2.04502	4.01897e-05	57
REACTOME_SIGNALING_BY_TYPE_1_INSULIN_LIKE_GROWTH_FACTOR_1_RECEPTOR_IGF1R	Signal Transduction	Signaling by IGF1R	Signaling by type 1 insulin like growth factor 1 receptor (IGF1R)				-1.53051	0.0393959	46	-1.75202	0.00367844	46
REACTOME_G_ALPHA_Q_SIGNALLING_EVENTS	Signal Transduction	G protein signaling	G alpha q signalling events				-1.52804	0.00794241	173	-1.95281	2.9228e-06	168
REACTOME_RAB_GERANYLGERANYLATION	Signal Transduction	Small GTPase signaling	Rab geranylgeranylation				-1.52655	0.03342	63
REACTOME_SIGNALING_BY_NTRKS	Signal Transduction	Signaling by Receptor Tyrosine Kinases	Signaling by NTRKs				-1.49936	0.0103242	131
REACTOME_GPCR_LIGAND_BINDING	Signal Transduction	G protein signaling	GPCR ligand binding				-1.39478	0.0186604	308	-1.59087	0.00016779	307
REACTOME_SIGNALING_BY_NUCLEAR_RECEPTORS	Signal Transduction	Signaling by Nuclear Receptors	Signaling by nuclear receptors				-1.36958	0.0214151	277
REACTOME_MAPK_FAMILY_SIGNALING_CASCADES	Signal Transduction	MAPK family signaling cascades	MAPK family signaling cascades				-1.36413	0.0193979	304
REACTOME_RHO_GTPASE_CYCLE	Signal Transduction	Signaling by Rho GTPases	Rho GTPase cycle				-1.30416	0.0251462	438	-1.46897	0.00044831	439
REACTOME_PTEN_REGULATION	Signal Transduction	PI3K/AKT signaling	PTEN regulation				1.49016	0.00948034	136	1.92279	1.38364e-05	136
REACTOME_MAPK6_MAPK4_SIGNALING	Signal Transduction	MAPK family signaling cascades	MAPK6/MAPK4 signaling				1.5128	0.0187643	88	1.61729	0.00634836	88
REACTOME_BETA_CATENIN_INDEPENDENT_WNT_SIGNALING	Signal Transduction	Signaling by WNT	Beta-catenin independent WNT signaling				1.56884	0.00331697	143
REACTOME_HEDGEHOG_ON_STATE	Signal Transduction	Signaling by Hedgehog	Hedgehog on state				1.63931	0.00619097	83	1.68159	0.00347426	83
REACTOME_DEGRADATION_OF_BETA_CATENIN_BY_THE_DESTRUCTION_COMPLEX	Signal Transduction	Signaling by WNT	Degradation of beta-catenin by the destruction complex				1.8464	0.000467548	83	1.90156	0.000201297	83
REACTOME_TNFR2_NON_CANONICAL_NF_KB_PATHWAY	Signal Transduction	Signaling by TNF	TNFR2 non-canonical NF-kB pathway				1.91324	0.000125569	92	1.83061	0.000326505	93
REACTOME_ASYMMETRIC_LOCALIZATION_OF_PCP_PROTEINS	Signal Transduction	Planar cell polarity pathway	Asymmetric localization of PCP proteins				1.92138	0.000457261	62	1.73807	0.00195453	62
REACTOME_SIGNALING_BY_NOTCH4	Signal Transduction	Signaling by NOTCH	Signaling by NOTCH4				1.92491	0.000470773	81	1.94987	9.49225e-05	81
REACTOME_PCP_CE_PATHWAY	Signal Transduction	Planar cell polarity pathway	Planar cell polarity (PCP) CE pathway				1.94639	9.82521e-05	90	1.50312	0.0147136	90
REACTOME_REGULATION_OF_RAS_BY_GAPS	Signal Transduction	Small GTPase signaling	Regulation of RAS by GAPS				1.98241	0.0001966	66	1.81173	0.00124586	66
REACTOME_REGULATION_OF_PTEN_STABILITY_AND_ACTIVITY	Signal Transduction	PI3K/AKT signaling	Regulation of PTEN stability and activity				2.13622	1.92082e-05	66	2.15479	6.41689e-06	66
REACTOME_DEGRADATION_OF_AXIN	Signal Transduction	Signaling by WNT	Degradation of Axin				2.25201	7.30523e-06	53	2.33139	6.68471e-07	53
REACTOME_DEGRADATION_OF_GLI1_BY_THE_PROTEASOME	Signal Transduction	Signaling by Hedgehog	Degradation of GLI1 by the proteasome				2.25314	5.15929e-06	57	2.08692	2.73906e-05	57
REACTOME_DEGRADATION_OF_DVL	Signal Transduction	Signaling by WNT	Degradation of DVL				2.36371	5.4519e-07	55	2.30752	1.23433e-06	55
REACTOME_NEGATIVE_REGULATION_OF_NOTCH4_SIGNALING	Signal Transduction	Signaling by NOTCH	Negative regulation of NOTCH4 signaling				2.52887	2.21656e-08	54	2.46713	2.78659e-08	54
REACTOME_DAG_AND_IP3_SIGNALING	Signal Transduction	Phosphoinositide signaling system	DAG and IP3 signaling							-1.8118	0.00321286	39
REACTOME_SIGNALING_BY_RETINOIC_ACID	Signal Transduction	Signaling by nuclear receptors	Signaling by retinoic acid							-1.80182	0.00347101	39
REACTOME_G_ALPHA_12_13_SIGNALLING_EVENTS	Signal Transduction	G protein signaling	G alpha 12/13 signalling events							-1.76368	0.000869139	77
REACTOME_REGULATION_OF_INSULIN_SECRETION	Signal Transduction	Insulin signaling	Regulation of insulin secretion							-1.75379	0.00177028	72
REACTOME_SIGNALING_BY_FGFR1_IN_DISEASE	Signal Transduction	Signaling by Receptor Tyrosine Kinases	Signaling by FGFR1 in disease							-1.66375	0.0159133	34
REACTOME_TGF_BETA_RECEPTOR_SIGNALING_ACTIVATES_SMADS	Signal Transduction	Signaling by TGF-beta family members	TGF beta receptor signaling activates SMADs							-1.63289	0.0112309	46
REACTOME_GPER1_SIGNALING	Signal Transduction	Steroid hormone receptor signaling	GPER1 signaling							-1.61001	0.0244542	41
REACTOME_SIGNALING_BY_VEGF	Signal Transduction	Signaling by VEGF	Signaling by VEGF							-1.60766	0.00535446	103
REACTOME_EPH_EPHRIN_MEDIATED_REPULSION_OF_CELLS	Signal Transduction	Signaling by receptor tyrosine kinases	EPH-Ephrin mediated repulsion of cells							-1.59453	0.0145551	50
REACTOME_EXTRA_NUCLEAR_ESTROGEN_SIGNALING	Signal Transduction	Steroid hormone receptor signaling	Extra nuclear estrogen signaling							-1.59141	0.0112208	73
REACTOME_G_ALPHA_Z_SIGNALLING_EVENTS	Signal Transduction	G protein signaling	G alpha z signalling events							-1.58022	0.0156475	44
REACTOME_G_ALPHA_I_SIGNALLING_EVENTS	Signal Transduction	G protein signaling	G alpha i signalling events							-1.57967	0.000849813	223
REACTOME_EPH_EPHRIN_SIGNALING	Signal Transduction	Signaling by receptor tyrosine kinases	EPH-Ephrin signaling							-1.57111	0.00717612	91
REACTOME_CA2_PATHWAY	Signal Transduction	Ca2+ signalling pathway	Ca2+ pathway							-1.56245	0.0128658	61
REACTOME_ACTIVATED_NOTCH1_TRANSMITS_SIGNAL_TO_THE_NUCLEUS	Signal Transduction	Signaling by NOTCH	Activated NOTCH1 transmits signal to the nucleus							-1.55278	0.0269143	31
REACTOME_IRS_MEDIATED_SIGNALLING	Signal Transduction	Insulin signaling	IRS mediated signalling							-1.54993	0.0447812	41
REACTOME_GLUCAGON_LIKE_PEPTIDE_1_GLP1_REGULATES_INSULIN_SECRETION	Signal Transduction	Insulin signaling	Glucagon-like peptide 1 (GLP1) regulates insulin secretion							-1.5458	0.0321314	38
REACTOME_SIGNALING_BY_NOTCH2	Signal Transduction	Signaling by NOTCH	Signaling by NOTCH2							-1.53922	0.0440939	30
REACTOME_EPHB_MEDIATED_FORWARD_SIGNALING	Signal Transduction	Signaling by ephrin receptors	EPHB mediated forward signaling							-1.51349	0.0300793	42
REACTOME_VASOPRESSIN_REGULATES_RENAL_WATER_HOMEOSTASIS_VIA_AQUAPORINS	Signal Transduction	Water homeostasis	Vasopressin regulates renal water homeostasis via aquaporins							-1.50586	0.0407243	37
REACTOME_CLASS_A_1_RHODOPSIN_LIKE_RECEPTORS	Signal Transduction	G protein signaling	Class A/1 (Rhodopsin-like receptors)							-1.49833	0.00431082	213
REACTOME_SIGNALING_BY_TGFB_FAMILY_MEMBERS	Signal Transduction	Signaling by TGF-beta family members	Signaling by TGF-beta family members							-1.49546	0.012875	115
REACTOME_TRANSLOCATION_OF_SLC2A4_GLUT4_TO_THE_PLASMA_MEMBRANE	Signal Transduction	Insulin signaling	Translocation of SLC2A4 (GLUT4) to the plasma membrane							-1.43144	0.0380887	70
REACTOME_SIGNALING_BY_TGF_BETA_RECEPTOR_COMPLEX	Signal Transduction	Signaling by TGF-beta family members	Signaling by TGF-beta receptor complex							-1.40941	0.0335327	90
REACTOME_RHOA_GTPASE_CYCLE	Signal Transduction	Signaling by Rho GTPases	RhoA GTPase cycle							-1.37819	0.0296826	145
REACTOME_TBC_RABGAPS	Signal Transduction	Small GTPase signaling	TBC/RABGAPs							1.4757	0.0370005	43
REACTOME_MTOR_SIGNALLING	Signal Transduction	Signaling by MTOR	MTOR signalling							1.47616	0.0382352	40
REACTOME_TAK1_DEPENDENT_IKK_AND_NF_KAPPA_B_ACTIVATION	Signal Transduction	Signaling by NF-kappaB	TAK1 dependent IKK and NF-kappaB activation							1.70559	0.00515033	42
REACTOME_KEAP1_NFE2L2_PATHWAY	Signal Transduction	NFE2L2 mediated oxidative stress response	KEAP1-NFE2L2 pathway							1.78494	0.00052822	103
REACTOME_NUCLEAR_EVENTS_MEDIATED_BY_NFE2L2	Signal Transduction	NFE2L2 mediated oxidative stress response	Nuclear events mediated by NFE2L2							1.90734	0.000251166	77
REACTOME_NEGATIVE_REGULATION_OF_SIGNALING_BY_G_PROTEIN_COUPLED_RECEPTORS	Signal Transduction	G protein signaling	Negative regulation of signaling by GPCRs
REACTOME_SIGNALING_BY_G_PROTEIN_COUPLED_RECEPTORS	Signal Transduction	G protein signaling	Signaling by G protein-coupled receptors
REACTOME_PLATELET_ACTIVATION_SIGNALING_AND_AGGREGATION	Signaling and aggregation	Signaling and aggregation	Platelet activation				-1.36976	0.0230982	239	-2.0092	2.12234e-08	238
REACTOME_FORMATION_OF_THE_CORNIFIED_ENVELOPE	Skin Development	Skin Development	Formation of the cornified envelope							-1.60762	0.0100062	68
REACTOME_KERATINIZATION	Skin Development	Skin Development	Keratnization							-1.57867	0.00954226	76
REACTOME_TRANSPORT_OF_INORGANIC_CATIONS_ANIONS_AND_AMINO_ACIDS_OLIGOPEPTIDES	Transport of small molecules	Transport of small molecules	Transport of inorganic cations/anions and amino acids/oligopeptides	1.72843	0.0026716	96	-2.09168	1.5184e-05	90	-1.80276	0.000418811	91
REACTOME_TRANSPORT_OF_BILE_SALTS_AND_ORGANIC_ACIDS_METAL_IONS_AND_AMINE_COMPOUNDS	Transport of small molecules	Transport of small molecules	Transport of bile salts and organic acids				-1.6552	0.010511	70
REACTOME_AMINO_ACID_TRANSPORT_ACROSS_THE_PLASMA_MEMBRANE	Transport of small molecules	Amino acid transport	Amino acid transport across the plasma membrane	2.19144	8.9964e-06	31				-1.55107	0.0407243	30
REACTOME_CARGO_CONCENTRATION_IN_THE_ER	Transport of small molecules	Vesicle mediated transport	Cargo concentration in the ER	2.11184	7.01367e-05	32				1.80836	0.00387881	32
REACTOME_TRANSPORT_TO_THE_GOLGI_AND_SUBSEQUENT_MODIFICATION	Transport of small molecules	Vesicle mediated transport	Transport to the Golgi and subsequent modification	1.85977	8.47239e-06	179				1.59274	0.000591662	179
REACTOME_SLC_MEDIATED_TRANSMEMBRANE_TRANSPORT	Transport of small molecules	Solute carrier family transport	SLC mediated transmembrane transport	1.55944	0.00243526	218	-1.84325	8.87441e-06	211	-1.61195	0.000513619	211
REACTOME_TRANSFERRIN_ENDOCYTOSIS_AND_RECYCLING	Transport of small molecules	Endocytosis	Transferrin endocytosis and recycling							-1.68159	0.0170208	30
REACTOME_INTRA_GOLGI_AND_RETROGRADE_GOLGI_TO_ER_TRAFFIC	Transport of small molecules	Vesicle mediated transport	Intra-Golgi and retrograde Golgi to ER traffic							1.55327	0.00108782	199
REACTOME_COPII_MEDIATED_VESICLE_TRANSPORT	Vesicle-mediated transport	Transport to the Golgi and subsequent modification	COPII-mediated vesicle transport	2.01693	4.13195e-05	67				2.00607	0.000110994	67
REACTOME_ER_TO_GOLGI_ANTEROGRADE_TRANSPORT	Vesicle-mediated transport	Transport to the Golgi and subsequent modification	ER to Golgi anterograde transport	1.98884	2.61206e-06	150				1.81822	3.83784e-05	150
REACTOME_COPI_MEDIATED_ANTEROGRADE_TRANSPORT	Vesicle-mediated transport	Golgi-to-ER retrograde traffic	COPI-mediated anterograde transport	1.72811	0.001995	98				1.58173	0.00621996	98
REACTOME_INTRA_GOLGI_TRAFFIC	Vesicle-mediated transport	Golgi-to-ER retrograde traffic	Intra Golgi traffic	1.65462	0.0159213	44
REACTOME_RETROGRADE_TRANSPORT_AT_THE_TRANS_GOLGI_NETWORK	Vesicle-mediated transport	Trans-Golgi network vesicle budding	Retrograde transport at the trans-Golgi network	1.59454	0.0301327	49				1.87298	0.00101828	49
REACTOME_TRANS_GOLGI_NETWORK_VESICLE_BUDDING	Vesicle-mediated transport	Trans-Golgi network vesicle budding	Trans-Golgi network vesicle budding	1.50461	0.0373405	72
REACTOME_COPI_INDEPENDENT_GOLGI_TO_ER_RETROGRADE_TRAFFIC	Vesicle-mediated transport	Golgi-to-ER retrograde traffic	COPI-independent Golgi to ER retrograde traffic	-1.67717	0.0116297	51
REACTOME_RECYCLING_PATHWAY_OF_L1	Vesicle-mediated transport	Endocytosis and recycling	Recycling pathway of L1	-1.77865	0.00328137	48				-1.6332	0.0172263	48
REACTOME_GAP_JUNCTION_ASSEMBLY	Vesicle-mediated transport	Gap junctions	Gap junction assembly	-2.03233	0.000302085	32	1.65565	0.0348987	31
